# Supplementary material
Source: PubMed Central journal article supplement (PMC2696623)
Supplement: NIHMS115962-supplement-1_si_001.pdf [file NIHMS115962-supplement-1_si_001.pdf]

**Cu(I)-Catalyzed Diamination of Disubstituted Terminal Olefins: An  
Approach to Potent NK<sub>1</sub> Antagonist**

**Yuehong Wen, Baoguo Zhao, and Yian Shi\***

*Department of Chemistry  
Colorado State University  
Fort Collins, CO 80523*

**Supporting Information**

Table of Contents

|                                                     |      |
|-----------------------------------------------------|------|
| General methods                                     | S-2  |
| Diamination procedure                               | S-2  |
| Deprotection procedure                              | S-2  |
| Synthesis of <b>Sch 425078</b>                      | S-4  |
| Characterization data of compounds <b>3</b>         | S-7  |
| NOE studies of compound <b>4a</b>                   | S-13 |
| NMR spectra of compounds <b>3, 4a, 5a, 6a, 9-14</b> | S-14 |
| The X-ray structure of compound <b>14</b>           | S-64 |

**General methods.** All commercially reagents were used without further purification. Column chromatography was performed with silica gel (200-400 mesh). <sup>1</sup>H NMR was recorded on 300 or 400 MHz spectrometers at ambient temperature. <sup>13</sup>C NMR was recorded at 75 or 100 MHz spectrometers at ambient temperature. IR spectra were recorded on a FT-IR spectrometer. Melting points were uncorrected.

Olefins **1a**, **1f**, **1h**, **1i**, **1j**, and **1p** were purchased and used directly. Olefins **1b-1e**, **1g**, and **1k-1n** were prepared from ketones using the Tebbe or Wittig reagents according to the reported procedures.<sup>1</sup> Olefin **1o** was prepared by following the reported procedure.<sup>2</sup>

(1) (a) Ohsugi, S.; Nishide, K.; Node, M. *Tetrahedron* **2003**, *59*, 1859. (b) Pine, S. H.; Shen, G. S.; Hoang, H. *Synthesis* **1991**, 165. (c) Tebbe, F. N.; Parshall, G. W.; Reddy, G. S. *J. Am. Chem. Soc.* **1978**, *100*, 3611.

(2) Beddow, J. E.; Davies, S. G.; Ling, K. B.; Roberts, P. M.; Russell, A. J.; Smith, A. D.; Thomson, J. E. *Org. Biomol. Chem.* **2007**, *5*, 2812.

**Representative diamination procedure (Table 1, entry 1).** To a 1.5 mL vial equipped with a stir bar was added CuCl (0.002 g, 0.02 mmol), triphenylphosphine (0.0052 g, 0.02 mmol), and CDCl<sub>3</sub> (0.3 mL). After the mixture was stirred at room temperature for 10 min, 2-phenylpropene (**1a**) (0.047 g, 0.4 mmol) was added. The reaction mixture was warmed to 65 °C using an oil bath with stirring, and di-*tert*-butyldiaziridinone (**2**) (0.136 g, 0.8 mmol) was added by syringe pump over 8 h. The reaction mixture was stirred at this temperature for an additional 1 h and purified by flash chromatography (silica gel, hexane:ether = 10:1, v/v) to give the diamination product **3a** as a white solid (0.105 g, 91%).

**Removal of one *tert*-butyl group (Scheme 2).** A mixture of compound **3a** (0.075 g, 0.26 mmol) and methanesulfonic acid (0.075 mL) in hexane (0.75 mL) was stirred at room temperature for 3.5 h. Water (7 mL) was then added. The mixture was extracted with chloroform (10 mL × 3), washed with brine (10 mL), dried (Na<sub>2</sub>SO<sub>4</sub>), filtered, concentrated, and purified by column chromatography (silica gel, hexane:ethyl acetate = 2:1, v/v) to give

compound **4a** as a white solid (0.060 g, 99%). mp 88-90 °C; IR (film) 3226, 1693  $\text{cm}^{-1}$ ;  $^1\text{H}$  NMR (400 MHz,  $\text{CDCl}_3$ )  $\delta$  7.38-7.31 (m, 4H), 7.29-7.22 (m, 1H), 4.92 (s, 1H), 3.48 (d,  $J = 8.8$  Hz, 1H), 3.40 (d,  $J = 8.8$  Hz, 1H), 1.61 (s, 3H), 1.32 (s, 9H);  $^{13}\text{C}$  NMR (100 MHz,  $\text{CDCl}_3$ )  $\delta$  161.4, 146.1, 128.6, 127.2, 124.8, 57.7, 56.3, 52.9, 28.2, 27.7; HRMS Calcd for  $\text{C}_{14}\text{H}_{21}\text{N}_2\text{O}$  ( $\text{M}+\text{H}^+$ ): 233.1648. Found: 233.1651.

**Removal of both of the *tert*-butyl groups (Scheme 2).** A mixture of compound **3a** (0.150 g, 0.52 mmol) and methanesulfonic acid (0.15 mL) in hexane (1.5 mL) was stirred at 65 °C for 3.5 h. Water (10 mL) was then added. The mixture was extracted with chloroform (20 mL  $\times$  3), washed with brine (10 mL), dried ( $\text{Na}_2\text{SO}_4$ ), filtered, concentrated, and purified by column chromatography (silica gel, ethyl acetate then ethyl acetate/methanol = 20/1) to give compound **5a** as a white solid (0.078 g, 85%). mp 197-198 °C; IR (film) 3193, 1699  $\text{cm}^{-1}$ ;  $^1\text{H}$  NMR (400 MHz,  $\text{DMSO-d}_6$ )  $\delta$  7.39-7.32 (m, 4H), 7.25-7.24 (m, 1H), 7.02 (s, 1H), 6.29 (s, 1H), 3.43 (d,  $J = 8.8$  Hz, 1H), 3.26 (d,  $J = 8.4$  Hz, 1H), 1.49 (s, 3H);  $^{13}\text{C}$  NMR (100 MHz,  $\text{DMSO-d}_6$ )  $\delta$  162.4, 147.1, 128.2, 126.6, 124.8, 59.6, 54.1, 28.7; Anal. Calcd for  $\text{C}_{10}\text{H}_{12}\text{N}_2\text{O}$ : C, 68.16; H, 6.86; N, 15.90. Found: C, 68.09; H, 6.84; N, 15.78.

**Preparation of diamine 6a (Scheme 2).** A mixture of compounds **3a** (0.116 g, 0.4 mmol) and conc. HCl (6.0 mL) was stirred at reflux for 30 h, washed with  $\text{CH}_2\text{Cl}_2$  (10 mL  $\times$  3), concentrated under reduced pressure, diluted with water (5 mL), and adjusted to basic (pH >12) with 15% aqueous NaOH. The mixture was extracted with  $\text{CH}_2\text{Cl}_2$  (10 mL  $\times$  3), washed with brine (10 mL), dried ( $\text{Na}_2\text{SO}_4$ ), filtered, and concentrated to give diamine **6a** as a dark yellow oil (0.052 g, 87% yield). IR (film) 3355, 3287  $\text{cm}^{-1}$ ;  $^1\text{H}$  NMR (300 MHz,  $\text{CDCl}_3$ )  $\delta$  7.43 (d,  $J = 8.1$  Hz, 2H), 7.35-7.30 (m, 2H), 7.23-7.18 (m, 1H), 2.91 (d,  $J = 12.3$  Hz, 1H), 2.72 (d,  $J = 12.3$  Hz, 1H), 1.41 (s, 3H), 1.34 (brs, 4H);  $^{13}\text{C}$  NMR (75 MHz,  $\text{CDCl}_3$ )  $\delta$  147.1, 128.3, 126.4, 125.5, 56.1, 54.7, 28.8; HRMS Calcd for  $\text{C}_9\text{H}_{14}\text{N}_2$  ( $\text{M}^+$ ): 150.1154. Found: 150.1157.

**Preparation of  $\alpha$ -bromomethylstyrene (7).** *N*-Bromosuccinimide (8.90 g, 50.0 mmol) was added to a solution of  $\alpha$ -methylstyrene (10.4 mL, 80.0 mmol) in  $\text{CCl}_4$  (5 mL), and the mixture was rapidly heated in an oil bath at 170 °C until the solids were dissolved. The reaction mixture was allowed to cool to room temperature and filtered to remove the precipitates. The filtrate was concentrated under reduced pressure and purified by flash chromatography (hexane) to give **7** as a colorless oil (5.0 g, 51%).  $^1\text{H}$  NMR (300 MHz,  $\text{CDCl}_3$ )  $\delta$  7.59-7.56 (m, 2H), 7.45-7.42 (m, 3H), 5.63 (s, 1H), 5.56 (s, 1H), 4.45 (s, 2H);  $^{13}\text{C}$  NMR (75 MHz,  $\text{CDCl}_3$ )  $\delta$  144.3, 137.6, 128.6, 128.4, 126.2, 117.3, 34.3.

Reed, S. F. *J. Org. Chem.* **1965**, *30*, 3258.

**Preparation of olefin 9.** To a stirred suspension of NaH (60% dispersion in mineral oil) (0.40 g, 10.0 mmol) in THF (20.0 mL) at 0 °C was added a solution of (*R*)-1-(3,5-bis(trifluoromethyl)phenyl)ethanol (2.582 g, 10.0 mmol) in THF (10.0 mL). After stirring at room temperature for 30 min, a solution of  $\alpha$ -bromomethylstyrene (1.97 g, 10.0 mmol) in THF (10.0 mL) was added. The resulting mixture was heated at reflux for 18 h, cooled to room temperature, filtered through Celite, concentrated, and purified by flash chromatography (silical gel, hexane:ethyl acetate = 100:1, v/v) to afford compound **9** as a colorless oil (2.90 g, 77%).  $[\alpha]_D^{20} = +43.8$  (*c* 1.1,  $\text{CH}_2\text{Cl}_2$ ); IR (film) 1279, 1177, 1134  $\text{cm}^{-1}$ ;  $^1\text{H}$  NMR (400 MHz,  $\text{CDCl}_3$ )  $\delta$  7.74 (d, *J* = 9.6 Hz, 3H), 7.38-7.35 (m, 2H), 7.31-7.24 (m, 3H), 5.49 (s, 1H), 5.27 (d, *J* = 1.2 Hz, 1H), 4.60 (q, *J* = 6.4 Hz, 1H), 4.31 (d, *J* = 12.8 Hz, 1H), 4.20 (d, *J* = 12.4 Hz, 1H), 1.41 (d, *J* = 6.4 Hz, 3H);  $^{13}\text{C}$  NMR (100 MHz,  $\text{CDCl}_3$ )  $\delta$  146.8, 144.2, 138.6, 132.4, 132.1, 131.8, 131.4, 128.6, 128.1, 126.6, 126.2, 124.9, 122.1, 121.7, 121.6, 115.0, 76.2, 71.1, 24.0.

**Diamination of compound 9.** To a 1.5 mL vial equipped with a stir bar was added CuCl (0.004 g, 0.04 mmol), triphenylphosphite (0.0124 g, 0.04 mmol), and  $\text{CDCl}_3$  (0.3 mL). After the mixture was stirred at room temperature for 10 min, compound **9** (0.075 g, 0.20 mmol) was added. The reaction mixture was warmed to 65 °C using an oil bath with stirring, and di-*tert*-butyldiaziridinone (**2**) (0.068 g, 0.40 mmol) was added by syringe pump over 8 h. The

reaction mixture was stirred at this temperature for an additional 2 h and purified by flash chromatography (silica gel, hexane:ether = 10:1, v/v) to give compound **10** as a sticky colorless oil (0.038 g, 35%) and more polar compound **11** as a sticky colorless oil (0.033 g, 30%).

**10**:  $[\alpha]_D^{20} = +19.8$  (*c* 2.5, CH<sub>2</sub>Cl<sub>2</sub>); IR (film) 1682 cm<sup>-1</sup>; <sup>1</sup>H NMR (300 MHz, CDCl<sub>3</sub>) δ 7.87 (s, 3H), 7.56 (d, *J* = 8.1 Hz, 2H), 7.42-7.32 (m, 3H), 4.77 (q, *J* = 6.6 Hz, 1H), 4.16 (d, *J* = 9.0 Hz, 1H), 3.80 (d, *J* = 9.0 Hz, 1H), 3.73 (d, *J* = 8.7 Hz, 1H), 3.21 (d, *J* = 8.7 Hz, 1H), 1.64 (d, *J* = 6.6 Hz, 3H), 1.37 (s, 9H), 1.20 (s, 9H); <sup>13</sup>C NMR (75 MHz, CDCl<sub>3</sub>) δ 160.4, 146.1, 145.2, 132.8, 132.4, 132.0, 131.5, 128.8, 128.4, 127.6, 126.9, 126.3, 125.2, 122.1, 122.0, 121.6, 78.4, 72.0, 64.0, 55.8, 54.5, 53.2, 29.8, 27.4, 24.0; HRMS Calcd for C<sub>28</sub>H<sub>35</sub>F<sub>6</sub>N<sub>2</sub>O<sub>2</sub> (M+H<sup>+</sup>): 545.2597. Found: 545.2601.

**11**:  $[\alpha]_D^{20} = +31.1$  (*c* 2.85, CH<sub>2</sub>Cl<sub>2</sub>); IR (film) 1685 cm<sup>-1</sup>; <sup>1</sup>H NMR (300 MHz, CDCl<sub>3</sub>) δ 7.90-7.89 (m, 3H), 7.45 (d, *J* = 6.9 Hz, 2H), 7.38-7.27 (m, 3H), 4.72 (q, *J* = 6.3 Hz, 1H), 4.03 (d, *J* = 9.0 Hz, 1H), 3.98 (d, *J* = 9.3 Hz, 1H), 3.71 (d, *J* = 8.7 Hz, 1H), 3.21 (d, *J* = 8.7 Hz, 1H), 1.62 (d, *J* = 6.6 Hz, 3H), 1.43 (s, 9H), 1.24 (s, 9H); <sup>13</sup>C NMR (75 MHz, CDCl<sub>3</sub>) δ 160.5, 146.4, 145.3, 132.8, 132.4, 131.9, 131.5, 128.4, 127.6, 126.4, 125.2, 121.9, 121.88, 121.8, 121.6, 78.3, 72.3, 63.9, 55.8, 54.8, 53.1, 29.8, 27.6, 23.7; HRMS Calcd for C<sub>28</sub>H<sub>35</sub>F<sub>6</sub>N<sub>2</sub>O<sub>2</sub> (M+H<sup>+</sup>): 545.2597. Found: 545.2601.

**Preparation of compound 12.** A mixture of compound **10** (0.140 g, 0.26 mmol) and CF<sub>3</sub>CO<sub>2</sub>H (0.52 mL) in a 3 mL vial was stirred at 80 °C for 2 h, concentrated, and purified by flash chromatography (silica gel, ethyl acetate) to give compound **12** as a white solid (0.083 g, 74%).  $[\alpha]_D^{20} = -52.9$  (*c* 1.2, CH<sub>2</sub>Cl<sub>2</sub>); mp 131-132 °C; IR (film) 3200, 1713 cm<sup>-1</sup>; <sup>1</sup>H NMR (300 MHz, CDCl<sub>3</sub>) δ 7.80 (s, 1H), 7.50 (s, 2H), 7.44-7.34 (m, 3H), 7.30-7.28 (m, 2H), 5.60 (s, 1H), 4.90 (s, 1H), 4.52 (q, *J* = 6.6 Hz, 1H), 3.78 (d, *J* = 8.7 Hz, 1H), 3.68 (d, *J* = 8.4 Hz, 1H), 3.58 (d, *J* = 9.0 Hz, 1H), 3.51 (d, *J* = 9.0 Hz, 1H), 1.43 (d, *J* = 6.6 Hz, 3H); <sup>13</sup>C NMR (75 MHz, CDCl<sub>3</sub>) δ 162.9, 146.1, 142.3, 132.6, 132.2, 131.8, 131.3, 128.9, 127.9, 126.2, 125.3, 125.1, 125.0, 121.8, 121.5, 78.0, 74.8, 63.4, 50.9, 24.1; Anal. Calcd for C<sub>20</sub>H<sub>18</sub>F<sub>6</sub>N<sub>2</sub>O<sub>2</sub>: C, 55.56; H, 4.20; N, 6.48. Found: C, 55.63; H, 4.42; N, 6.33; HRMS Calcd for C<sub>20</sub>H<sub>19</sub>F<sub>6</sub>N<sub>2</sub>O<sub>2</sub>

(M+H<sup>+</sup>): 433.1345. Found: 433.1347.

**Preparation of compound 13.** A mixture of compound **10** (0.168 g, 0.31 mmol) and CF<sub>3</sub>CO<sub>2</sub>H (0.6 mL) in a 3 mL vial was stirred at rt for 1 h, concentrated, and purified by flash chromatography (silica gel, ethyl acetate:hexane = 1:2, v/v) to give compound **13** as a sticky colorless oil (0.142 g, 94%).  $[\alpha]_D^{20} = -31.6$  (*c* 3.8, CH<sub>2</sub>Cl<sub>2</sub>); IR (film) 1694 cm<sup>-1</sup>; <sup>1</sup>H NMR (300 MHz, CDCl<sub>3</sub>) δ 7.75 (s, 1H), 7.45 (s, 2H), 7.40-7.29 (m, 3H), 7.26-7.24 (m, 2H), 5.26 (brs, 1H), 4.46 (q, *J* = 6.6 Hz, 1H), 3.66 (d, *J* = 8.4 Hz, 1H), 3.57 (d, *J* = 8.4 Hz, 1H), 3.49 (d, *J* = 8.7 Hz, 1H), 3.35 (d, *J* = 9.0 Hz, 1H), 1.36 (d, *J* = 6.3 Hz, 3H), 1.33 (s, 9H); <sup>13</sup>C NMR (75 MHz, CDCl<sub>3</sub>) δ 161.2, 146.2, 142.6, 132.6, 132.2, 131.7, 131.3, 128.8, 127.7, 126.3, 126.2, 125.1, 121.8, 121.7, 121.5, 78.0, 74.7, 59.2, 53.4, 53.3, 27.7, 24.2; HRMS Calcd for C<sub>24</sub>H<sub>27</sub>F<sub>6</sub>N<sub>2</sub>O<sub>2</sub> (M+H<sup>+</sup>): 489.1971. Found: 489.1979.

**Preparation of compound 14.** To a solution of **13** (0.090 g, 0.184 mmol) in anhydrous THF (2 mL) at 0 °C under Ar, was added a solution of *n*-BuLi in pentane (2.0 M, 0.14 mL, 0.28 mmol). After the mixture was stirred at 0 °C for 15 min, a solution of benzoyl chloride (0.042 mL, 0.051 g, 0.36 mmol) in THF (1 mL) was added. Upon stirring at 0 °C for an additional 2 h, the reaction mixture was quenched with saturated aqueous ammonium chloride solution, extracted with CH<sub>2</sub>Cl<sub>2</sub> (15 mL × 3), washed with saturated aqueous NaHCO<sub>3</sub> and brine, dried (Na<sub>2</sub>SO<sub>4</sub>), filtered, concentrated, and purified by flash chromatography (silica gel, ethyl acetate:hexane = 1:8, v/v) to give compound **14** as a white solid (0.068 g, 62%).  $[\alpha]_D^{20} = -15.1$  (*c* 1.45, CH<sub>2</sub>Cl<sub>2</sub>); mp 162-163 °C; IR (film) 1727, 1668 cm<sup>-1</sup>; <sup>1</sup>H NMR (400 MHz, CDCl<sub>3</sub>) δ 8.10-8.08 (m, 1H), 7.74 (s, 1H), 7.66 (s, 2H), 7.48-7.43 (m, 2H), 7.41-7.33 (m, 4H), 7.31-7.23 (m, 3H), 4.65 (q, *J* = 6.4 Hz, 1H), 4.21 (d, *J* = 9.2 Hz, 1H), 4.18 (d, *J* = 9.2 Hz, 1H), 4.07 (d, *J* = 9.2 Hz, 1H), 3.50 (d, *J* = 8.8 Hz, 1H), 1.53 (d, *J* = 6.4 Hz, 3H), 1.34 (s, 9H); <sup>13</sup>C NMR (100 MHz, CDCl<sub>3</sub>) δ 170.3, 154.4, 145.9, 141.3, 135.8, 133.9, 132.1, 131.8, 131.4, 130.3, 128.9, 128.6, 128.5, 128.0, 127.7, 126.3, 125.0, 124.7, 121.9, 78.1, 69.8, 63.7, 54.3, 52.9, 27.5, 23.8; HRMS Calcd for C<sub>31</sub>H<sub>31</sub>F<sub>6</sub>N<sub>2</sub>O<sub>3</sub> (M+H<sup>+</sup>): 593.2233. Found: 593.2241.

**Table 1, Entry 1**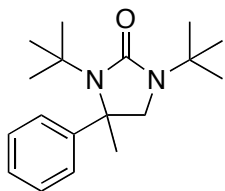

White solid; mp 74-75 °C; IR (film) 1688 cm<sup>-1</sup>; <sup>1</sup>H NMR (400 MHz, CDCl<sub>3</sub>) δ 7.47-7.45 (m, 2H), 7.33-7.29 (m, 2H), 7.24-7.23 (m, 1H), 3.16 (d, *J* = 8.8 Hz, 1H), 3.06 (d, *J* = 8.8 Hz, 1H), 1.80 (s, 3H), 1.31 (s, 9H), 1.19 (s, 9H); <sup>13</sup>C NMR (100 MHz, CDCl<sub>3</sub>) δ 160.5, 147.8, 128.3, 127.1, 126.3, 61.3, 60.3, 55.6, 53.0, 29.8, 27.5, 24.3; Anal. Calcd for C<sub>18</sub>H<sub>28</sub>N<sub>2</sub>O: C, 74.96; H, 9.78; N, 9.71. Found: C, 75.19; H, 9.56; N, 9.94.

**Table 1, Entry 2**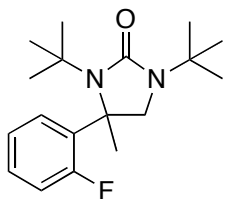

White solid; mp 110-111 °C; IR (film) 1689 cm<sup>-1</sup>; <sup>1</sup>H NMR (400 MHz, CDCl<sub>3</sub>) δ 7.30-7.26 (m, 1H), 7.20-7.18 (m, 1H), 7.03-6.93 (m, 2H), 3.33 (d, *J* = 8.4 Hz, 1H), 3.01 (dd, *J* = 8.4, 2.8 Hz, 1H), 1.75 (s, 3H), 1.25 (s, 9H), 1.12 (s, 9H); <sup>13</sup>C NMR (100 MHz, CDCl<sub>3</sub>) δ 162.5, 159.9 (*J* = 29.2 Hz), 133.8 (*J* = 7.3 Hz), 129.5 (*J* = 9.1 Hz), 128.3 (*J* = 3.6 Hz), 123.9 (*J* = 2.7 Hz), 117.1 (*J* = 21.9 Hz), 59.5, 57.7, 55.4, 53.2, 29.6, 27.6, 26.1; Anal. Calcd for C<sub>18</sub>H<sub>27</sub>FN<sub>2</sub>O: C, 70.55; H, 8.88; N, 9.14. Found: C, 70.33; H, 8.65; N, 9.06.

**Table 1, Entry 3**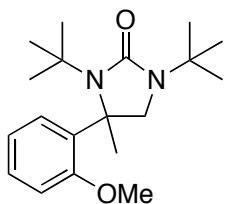

White solid; mp 56-57 °C; IR (film) 1681 cm<sup>-1</sup>; <sup>1</sup>H NMR (300 MHz, CDCl<sub>3</sub>) δ 7.32-7.26 (m, 2H), 6.93-6.88 (m, 2H), 3.83 (s, 3H), 3.58 (d, *J* = 8.1 Hz, 1H), 2.97 (d, *J* = 7.5 Hz, 1H), 1.83

(s, 3H), 1.37 (s, 9H), 1.18 (s, 9H);  $^{13}\text{C}$  NMR (75 MHz,  $\text{CDCl}_3$ )  $\delta$  160.1, 158.0, 133.6, 128.9, 127.6, 120.0, 111.3, 59.6, 56.4, 55.0, 54.5, 53.0, 29.5, 27.7, 27.4; Anal. Calcd for  $\text{C}_{19}\text{H}_{30}\text{N}_2\text{O}_2$ : C, 71.66; H, 9.50; N, 8.80. Found: C, 71.45; H, 9.61; N, 8.83.

**Table 1, Entry 4**

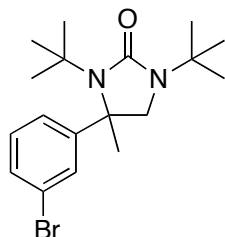

White solid; mp 90-91 °C; IR (film) 1690  $\text{cm}^{-1}$ ;  $^1\text{H}$  NMR (300 MHz,  $\text{CDCl}_3$ )  $\delta$  7.60-7.59 (m, 1H), 7.44-7.36 (m, 2H), 7.23-7.18 (m, 1H), 3.12 (d,  $J = 8.4$  Hz, 1H), 3.08 (d,  $J = 8.7$  Hz, 1H), 1.80 (s, 3H), 1.32 (s, 9H), 1.21 (s, 9H);  $^{13}\text{C}$  NMR (100 MHz,  $\text{CDCl}_3$ )  $\delta$  160.3, 150.4, 130.3, 130.0, 129.3, 125.0, 122.6, 61.2, 60.0, 55.7, 53.1, 29.8, 27.5, 24.5; Anal. Calcd for  $\text{C}_{18}\text{H}_{27}\text{BrN}_2\text{O}$ : C, 58.86; H, 7.41; N, 7.63. Found: C, 58.77; H, 7.50; N, 7.54.

**Table 1, Entry 5**

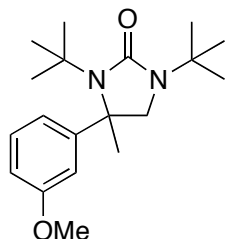

White solid; mp 113-115 °C; IR (film) 1683  $\text{cm}^{-1}$ ;  $^1\text{H}$  NMR (400 MHz,  $\text{CDCl}_3$ )  $\delta$  7.25-7.21 (m, 1H), 7.05-7.01 (m, 2H), 6.78-6.76 (m, 1H), 3.79 (s, 3H), 3.16 (d,  $J = 8.4$  Hz, 1H), 3.06 (d,  $J = 8.4$  Hz, 1H), 1.79 (s, 3H), 1.31 (s, 9H), 1.21 (s, 9H);  $^{13}\text{C}$  NMR (100 MHz,  $\text{CDCl}_3$ )  $\delta$  160.5, 159.6, 149.7, 129.4, 118.7, 112.6, 112.0, 61.4, 60.2, 55.6, 55.3, 53.1, 29.7, 27.5, 24.6; Anal. Calcd for  $\text{C}_{19}\text{H}_{30}\text{N}_2\text{O}_2$ : C, 71.66; H, 9.50; N, 8.80. Found: C, 72.02; H, 9.27; N, 8.97.



**Table 1, Entry 6**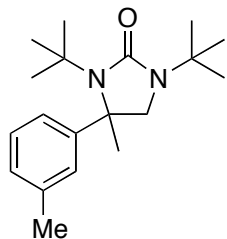

Colorless oil; IR (film)  $1690\text{ cm}^{-1}$ ;  $^1\text{H NMR}$  (300 MHz,  $\text{CDCl}_3$ )  $\delta$  7.30-7.28 (m, 2H), 7.25-7.19 (m, 1H), 7.08-7.05 (m, 1H), 3.18 (d,  $J = 8.4\text{ Hz}$ , 1H), 3.08 (d,  $J = 8.4\text{ Hz}$ , 1H), 2.36 (s, 3H), 1.82 (s, 3H), 1.34 (s, 9H), 1.22 (s, 9H);  $^{13}\text{C NMR}$  (75 MHz,  $\text{CDCl}_3$ )  $\delta$  160.5, 147.8, 137.8, 128.2, 127.8, 126.9, 123.4, 61.3, 60.2, 55.5, 53.0, 29.8, 27.5, 24.4, 21.7; Anal. Calcd for  $\text{C}_{19}\text{H}_{30}\text{N}_2\text{O}$ : C, 75.45; H, 10.00; N, 9.26. Found: C, 75.58; H, 9.89; N, 9.09.

**Table 1, Entry 7**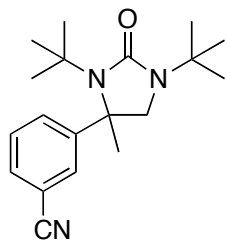

White solid; mp  $175\text{-}176\text{ }^\circ\text{C}$ ; IR (film)  $1686\text{ cm}^{-1}$ ;  $^1\text{H NMR}$  (400 MHz,  $\text{CDCl}_3$ )  $\delta$  7.72-7.67 (m, 2H), 7.50-7.48 (m, 1H), 7.42-7.38 (m, 1H), 3.05-3.02 (m, 2H), 1.76 (s, 3H), 1.24 (s, 9H), 1.11 (s, 9H);  $^{13}\text{C NMR}$  (100 MHz,  $\text{CDCl}_3$ )  $\delta$  160.1, 149.6, 131.0, 129.6, 129.3, 118.8, 112.5, 61.1, 59.8, 55.8, 53.2, 29.9, 27.5, 24.3; Anal. Calcd for  $\text{C}_{19}\text{H}_{27}\text{N}_3\text{O}$ : C, 72.81; H, 8.68; N, 13.41. Found: C, 73.15; H, 8.61; N, 13.66.

**Table 1, Entry 8**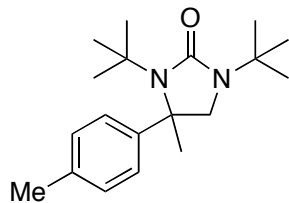

Colorless oil; IR (film)  $1690\text{ cm}^{-1}$ ;  $^1\text{H NMR}$  (400 MHz,  $\text{CDCl}_3$ )  $\delta$  7.34 (d,  $J = 8.0\text{ Hz}$ , 2H), 7.11 (d,  $J = 8.4\text{ Hz}$ , 2H), 3.14 (d,  $J = 8.4\text{ Hz}$ , 1H), 3.04 (d,  $J = 8.0\text{ Hz}$ , 1H), 2.32 (s, 3H), 1.78 (s,

3H), 1.31 (s, 9H), 1.19 (s, 9H);  $^{13}\text{C}$  NMR (100 MHz,  $\text{CDCl}_3$ )  $\delta$  160.6, 144.8, 136.8, 129.0, 126.2, 61.1, 60.3, 55.5, 53.0, 29.8, 27.5, 24.4, 21.1; Anal. Calcd for  $\text{C}_{19}\text{H}_{30}\text{N}_2\text{O}$ : C, 75.45; H, 10.00; N, 9.26. Found: C, 75.18; H, 9.89; N, 9.06.

**Table 1, Entry 9**

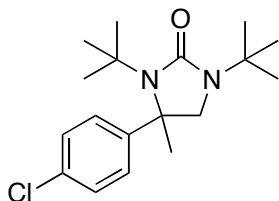

Colorless oil; IR (film)  $1689\text{ cm}^{-1}$ ;  $^1\text{H}$  NMR (400 MHz,  $\text{CDCl}_3$ )  $\delta$  7.38 (d,  $J = 8.4$  Hz, 2H), 7.26 (d,  $J = 8.8$  Hz, 2H), 3.08 (d,  $J = 8.4$  Hz, 1H), 3.04 (d,  $J = 8.8$  Hz, 1H), 1.77 (s, 3H), 1.28 (s, 9H), 1.17 (s, 9H);  $^{13}\text{C}$  NMR (100 MHz,  $\text{CDCl}_3$ )  $\delta$  160.3, 146.4, 133.0, 128.5, 127.7, 61.0, 60.0, 55.6, 53.0, 29.8, 27.5, 24.4; Anal. Calcd for  $\text{C}_{18}\text{H}_{27}\text{ClN}_2\text{O}$ : C, 66.96; H, 8.43; N, 8.68. Found: C, 66.94; H, 8.52; N, 8.69.

**Table 1, Entry 10**

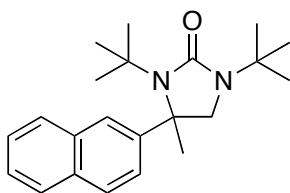

White solid; mp  $103\text{-}104\text{ }^\circ\text{C}$ ; IR (film)  $1689\text{ cm}^{-1}$ ;  $^1\text{H}$  NMR (300 MHz,  $\text{CDCl}_3$ )  $\delta$  7.88-7.81 (m, 4H), 7.75-7.72 (m, 1H), 7.52-7.49 (m, 2H), 3.28 (d,  $J = 8.4$  Hz, 1H), 3.13 (d,  $J = 8.7$  Hz, 1H), 1.98 (s, 3H), 1.38 (s, 9H), 1.26 (s, 9H);  $^{13}\text{C}$  NMR (75 MHz,  $\text{CDCl}_3$ )  $\delta$  160.6, 145.0, 133.1, 132.5, 128.2, 128.16, 127.7, 126.5, 126.2, 125.2, 124.0, 61.6, 59.6, 55.7, 53.1, 29.8, 27.6, 24.5; Anal. Calcd for  $\text{C}_{22}\text{H}_{30}\text{N}_2\text{O}$ : C, 78.06; H, 8.93; N, 8.28. Found: C, 78.15; H, 8.70; N, 8.14.

**Table 1, Entry 11**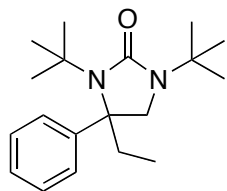

Colorless oil; IR (film) 1685  $\text{cm}^{-1}$ ;  $^1\text{H}$  NMR (300 MHz,  $\text{CDCl}_3$ )  $\delta$  7.49-7.46 (m, 2H), 7.36-7.29 (m, 2H), 7.27-7.22 (m, 1H), 3.30 (d,  $J = 8.7$  Hz, 1H), 3.25 (d,  $J = 9.0$  Hz, 1H), 2.40-2.28 (m, 1H), 2.13-2.01 (m, 1H), 1.36 (s, 9H), 1.22 (s, 9H), 1.14 (t,  $J = 7.2$ , 3H);  $^{13}\text{C}$  NMR (75 MHz,  $\text{CDCl}_3$ )  $\delta$  160.7, 148.8, 128.3, 127.1, 126.3, 63.1, 57.1, 55.6, 53.1, 31.2, 29.4, 27.6, 8.6; HRMS Calcd for  $\text{C}_{19}\text{H}_{31}\text{N}_2\text{O}$  ( $\text{M}+\text{H}^+$ ): 303.2431. Found: 303.2435.

**Table 1, Entry 12**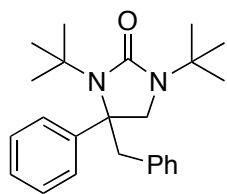

White solid; mp 115-117  $^\circ\text{C}$ ; IR (film) 1684  $\text{cm}^{-1}$ ;  $^1\text{H}$  NMR (300 MHz,  $\text{CDCl}_3$ )  $\delta$  7.65-7.63 (m, 2H), 7.43-7.33 (m, 4H), 7.31-7.23 (m, 4H), 3.61 (s, 2H), 3.53 (d,  $J = 9.0$  Hz, 1H), 3.31 (d,  $J = 9.0$  Hz, 1H), 1.28 (s, 9H), 1.16 (s, 9H);  $^{13}\text{C}$  NMR (75 MHz,  $\text{CDCl}_3$ )  $\delta$  160.1, 148.3, 137.4, 130.6, 128.4, 128.3, 127.4, 127.0, 126.7, 63.3, 56.5, 56.1, 52.8, 43.5, 29.8, 27.3; Anal. Calcd for  $\text{C}_{24}\text{H}_{32}\text{N}_2\text{O}$ : C, 79.08; H, 8.85; N, 7.68. Found: C, 78.87; H, 8.61; N, 7.40.

**Table 1, Entry 13**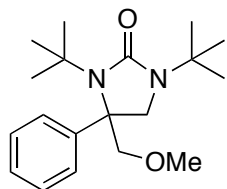

Colorless oil; IR (film) 1690  $\text{cm}^{-1}$ ;  $^1\text{H}$  NMR (400 MHz,  $\text{CDCl}_3$ )  $\delta$  7.43-7.40 (m, 2H), 7.25-7.22 (m, 2H), 7.18-7.16 (m, 1H), 4.02 (d,  $J = 9.2$  Hz, 1H), 3.67 (d,  $J = 9.2$  Hz, 1H), 3.61 (d,  $J = 9.2$  Hz, 1H), 3.41 (s, 3H), 3.00 (d,  $J = 9.2$  Hz, 1H), 1.26 (s, 9H), 1.09 (s, 9H);  $^{13}\text{C}$  NMR

(100 MHz, CDCl<sub>3</sub>)  $\delta$  160.5, 145.5, 128.2, 127.3, 126.8, 75.3, 64.1, 59.2, 55.7, 53.9, 53.1, 29.8, 27.6; Anal. Calcd for C<sub>19</sub>H<sub>30</sub>N<sub>2</sub>O<sub>2</sub>: C, 71.66; H, 9.50; N, 8.80. Found: C, 71.42; H, 9.40; N, 8.61.

**Table 1, Entry 14**

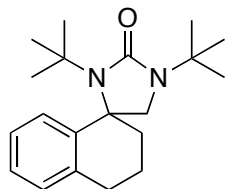

White solid; mp 124-125 °C; IR (film) 1688 cm<sup>-1</sup>; <sup>1</sup>H NMR (300 MHz, CDCl<sub>3</sub>)  $\delta$  7.7 (d, *J* = 7.8 Hz, 1H), 7.28-7.12 (m, 2H), 7.05-7.02 (m, 1H), 3.35 (d, *J* = 8.7 Hz, 1H), 3.11 (d, *J* = 8.7 Hz, 1H), 2.78-2.76 (m, 2H), 2.19-2.16 (m, 2H), 2.03-1.98 (m, 1H), 1.83-1.76 (m, 1H), 1.36 (s, 9H), 1.25 (s, 9H); <sup>13</sup>C NMR (75 MHz, CDCl<sub>3</sub>)  $\delta$  160.8, 142.7, 137.6, 128.8, 128.3, 1226.8, 126.3, 61.7, 58.3, 55.2, 53.0, 31.9, 29.9, 29.8, 27.5, 21.4; Anal. Calcd for C<sub>20</sub>H<sub>30</sub>N<sub>2</sub>O: C, 76.39; H, 9.62; N, 8.91. Found: C, 76.34; H, 9.46; N, 8.88.

**Table 1, Entry 15**

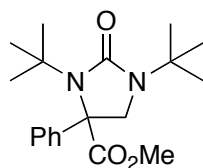

Yellow oil; IR (film) 1751, 1697 cm<sup>-1</sup>; <sup>1</sup>H NMR (300 MHz, CDCl<sub>3</sub>)  $\delta$  7.53-7.50 (m, 2H), 7.34-7.31 (m, 3H), 3.91 (s, 3H), 3.85 (d, *J* = 9.0 Hz, 1H), 3.38 (d, *J* = 9.0 Hz, 1H), 1.33 (s, 9H), 1.24 (s, 9H); <sup>13</sup>C NMR (75 MHz, CDCl<sub>3</sub>)  $\delta$  173.8, 159.8, 142.4, 128.3, 128.0, 127.3, 69.2, 57.7, 56.6, 53.4, 52.6, 29.0, 27.3; Anal. Calcd for C<sub>19</sub>H<sub>28</sub>N<sub>2</sub>O<sub>3</sub>: C, 68.65; H, 8.49; N, 8.43. Found: C, 68.90; H, 8.28; N, 8.17.

**Table 1, Entry 16**

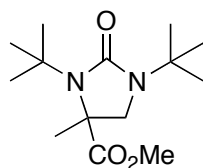

White solid; mp 66-68 °C; IR (film) 1743, 1697  $\text{cm}^{-1}$ ;  $^1\text{H}$  NMR (300 MHz,  $\text{CDCl}_3$ )  $\delta$  3.74 (s, 3H), 3.31 (d,  $J = 8.1$  Hz, 1H), 2.99 (d,  $J = 7.8$  Hz, 1H), 1.57 (s, 3H), 1.34 (s, 9H), 1.29 (s, 9H);  $^{13}\text{C}$  NMR (75 MHz,  $\text{CDCl}_3$ )  $\delta$  175.5, 159.4, 61.8, 55.2, 54.1, 53.2, 52.6, 28.8, 27.4, 23.7; HRMS Calcd for  $\text{C}_{14}\text{H}_{27}\text{N}_2\text{O}_3$  ( $\text{M}+\text{H}^+$ ): 271.2016. Found: 271.2021.

**NOE studies of compound 4a.**

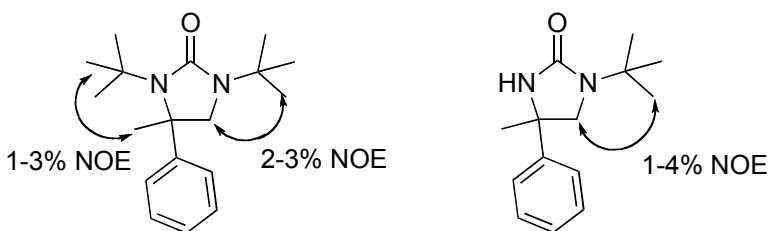

STANDARD 1H OBSERVE

Pulse Sequence: sZgU1  
 Solvent: CDCl3  
 Ambient Temperature  
 File: ven-1-30AH  
 INOVA-500 "epoxide"

Pulse 31.0 degrees  
 Acq. time: 2.291 sec  
 Rfid: 0.9876 Hz  
 OBSERVE: H1=400.1063280 MHz  
 DATA PROCESSING  
 Gauss apodization 0.971 sec  
 F1 size: 65536  
 Total time 0 min, 23 sec

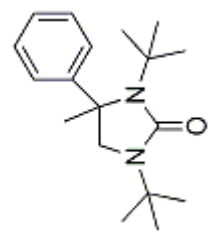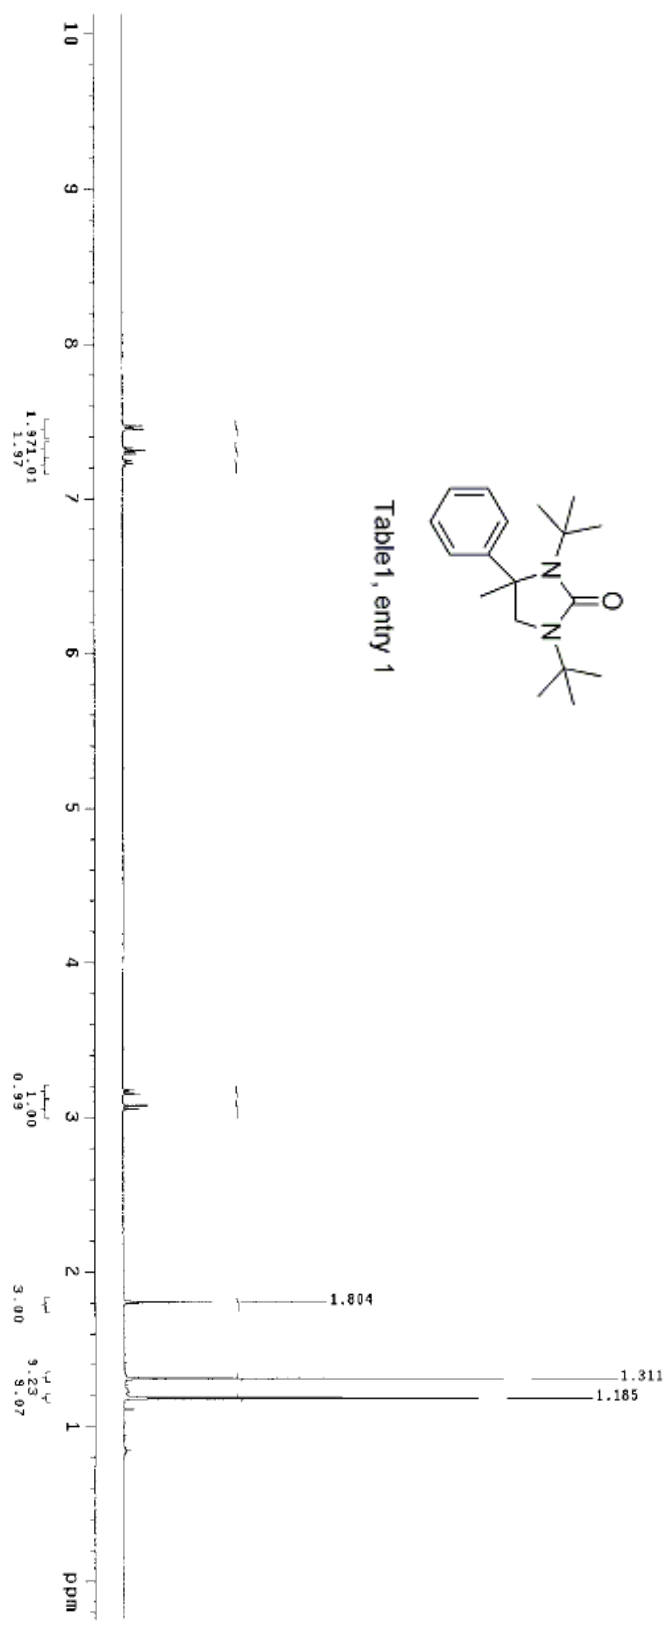

13C OBSERVE

Pulse Sequence: s2pul  
Solvent: CDCl3  
Ambient Temperature  
File: Wen-1-30AC  
INOVA-500 "epoxide"

Relax. delay 1.700 sec  
Pulse 44.5 degrees  
Acq. time 0.533 sec  
Waltz16 2.0 Hz  
200 repetitions  
OBSERVE C13, 100.606039 MHz  
DECUPLE H1, 400.1483268 MHz  
Power 42 dB  
continuously on  
WALTZ-16 Modulated  
D1H1 100.606039 MHz  
File Processing 2.0 Hz  
F1 size 32768  
Total time 29 min, 53 sec

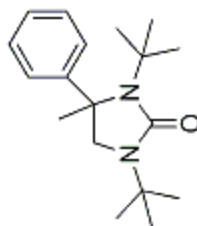

Table1, entry 1

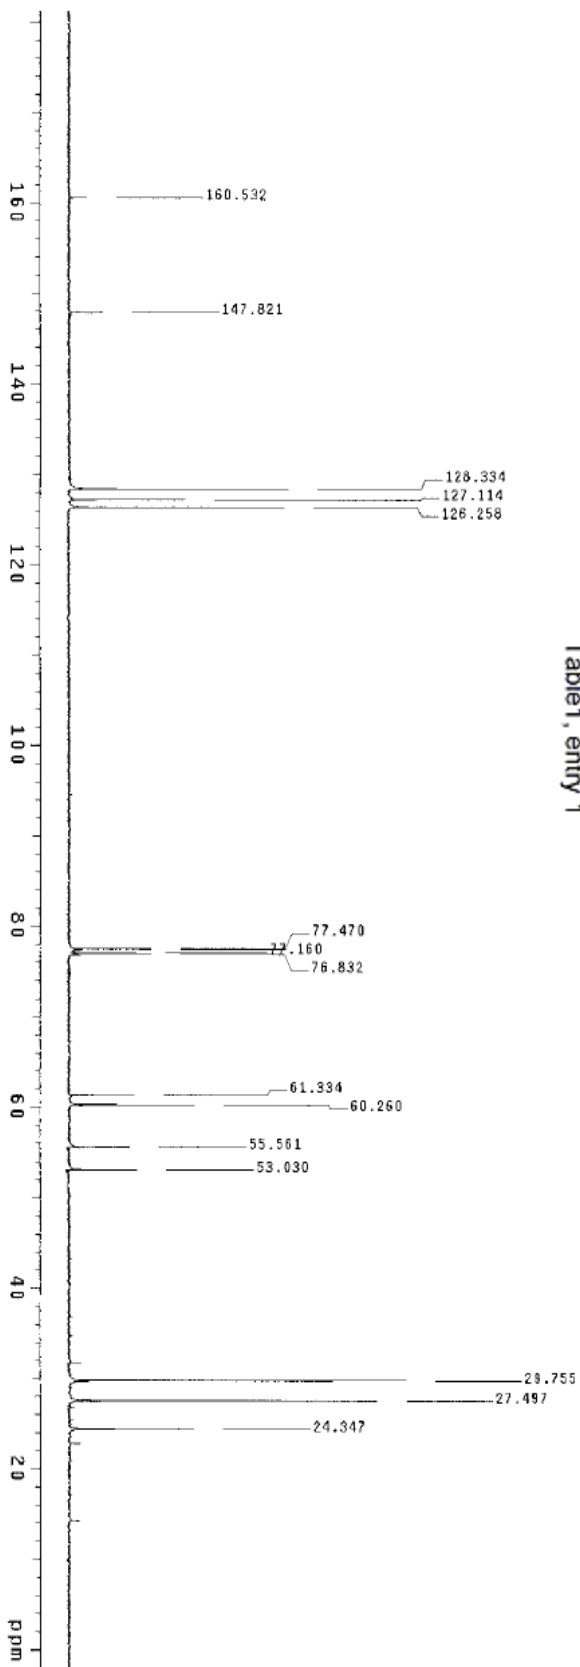

STANDARD 1H OBSERVE

Pulse Sequence: s2pu1

Solvent: CDCl3

Acq. time: 2.291 sec

File: Men-2-184HM

INOVA-500 "epoxide"

Pulse: 31.0 degrees

Acq. time: 2.291 sec

Width: 6982.6 Hz

8 repetitions

DSK: 0.001063260 MHz

DSK: 0.001063260 MHz

Gauss: 400.1063260 MHz

Fl. size: 65586

Total time: 0 min, 23 sec

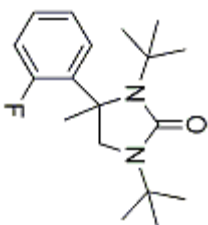

Table 1, entry 2

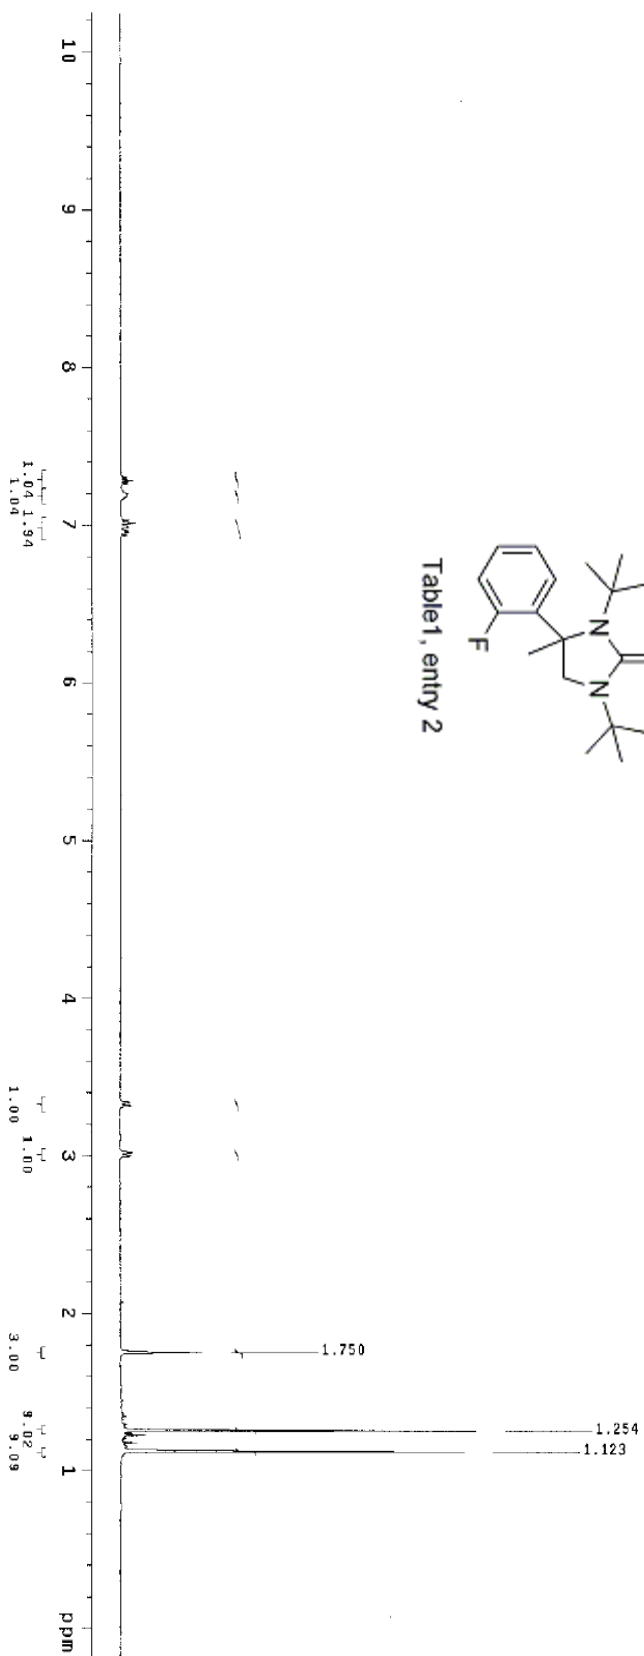



13C OBSERVE

Pulse Sequence: s2pu1  
Solvent: CDCl3  
Ambient Temperature  
File: w6h-2\_15AC  
INDVA-300 "epoxide"

Relax. delay 1.700 sec  
Pulse 4d 5 degrees  
Acq. time 0.533 sec  
Width 30018.8 Hz  
160 repetitions  
OBSERVE C13, 100.6088057 MHz  
DECOUPLE H1, 400.1085208 MHz  
continuously on  
WALTZ-16 modulated  
DATA PROCESSING  
Line broadening 2.0 Hz  
F1 size 52768  
Total time 29 min, 53 sec

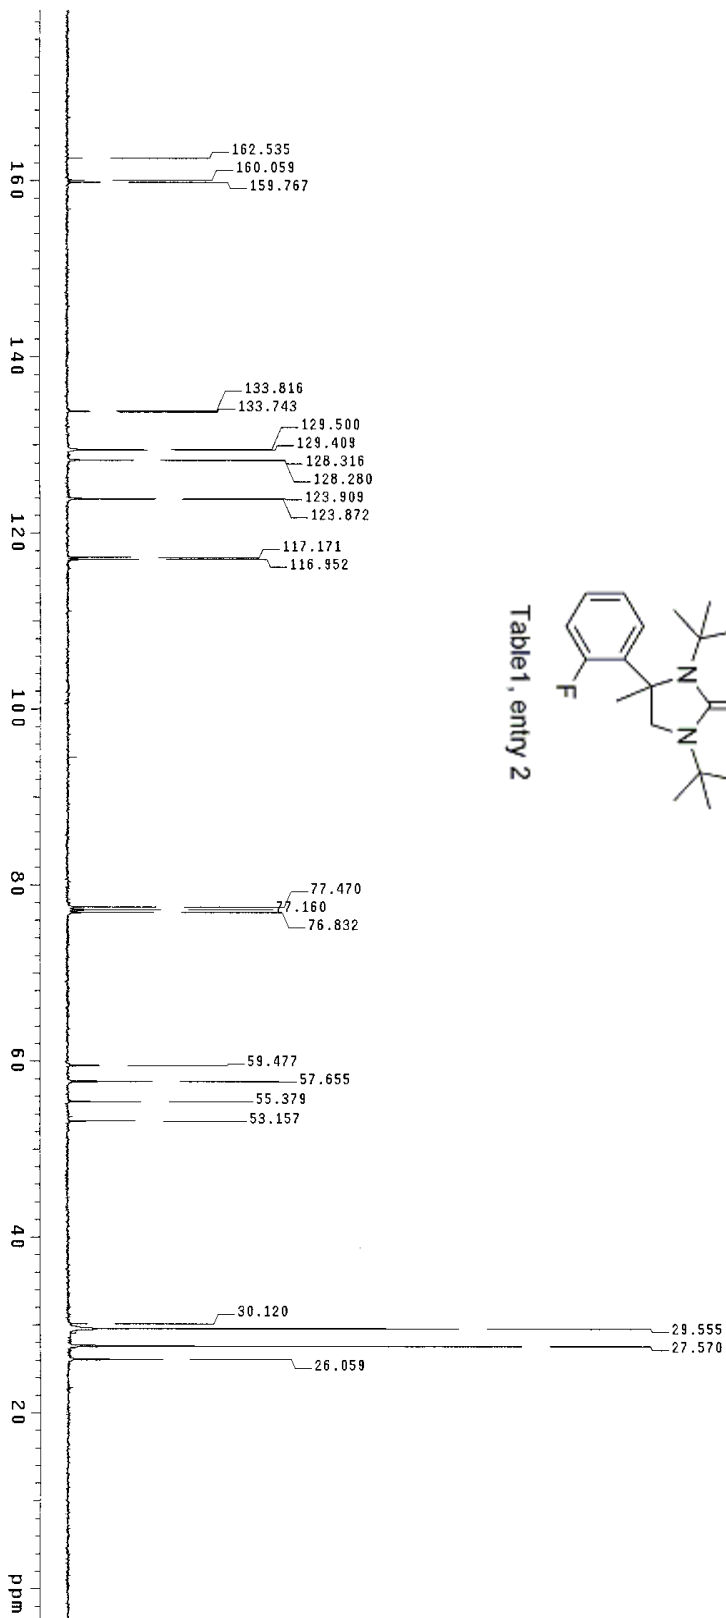

Table1, entry 2

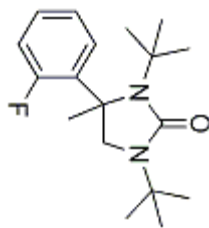

STANDARD 1H OBSERVE

Pulse Sequence: s2pu1  
Solvent: CDCl3  
Ambient Temperature  
File: Ven-2-22AH  
INOVA-500 "epoxide"  
Relax. delay 1.000 sec  
Pulse: 94.0 degrees  
Acq. time 2.721 sec  
Aft. 800.152  
8 Repetitions  
OBSERVE H1: 299.9533661 MHz  
DATA PROCESSING  
Gauss apodization 0.424 sec  
F1 size 65536  
Total time 9 min, 37 sec

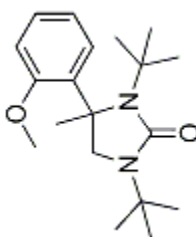

Table 1, entry 3

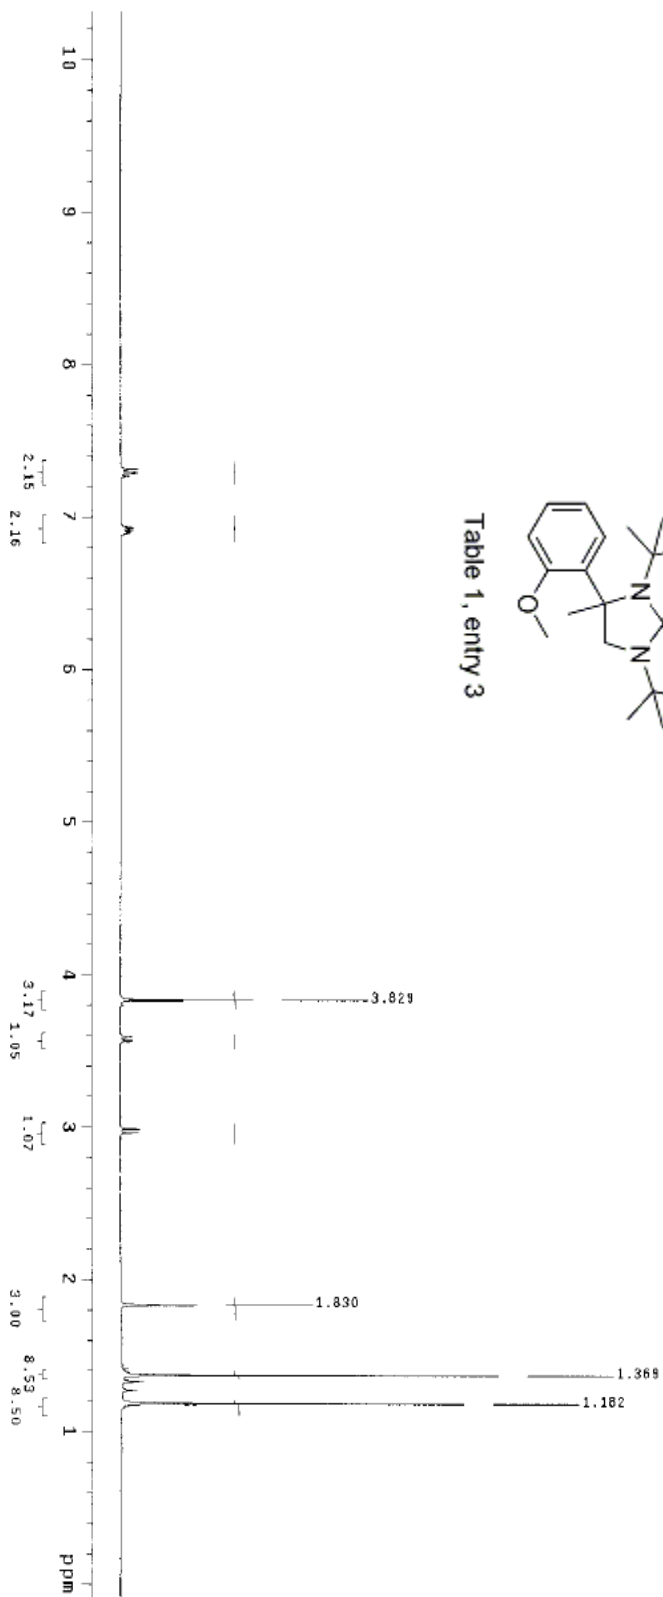

13C OBSERVE

Pulse Sequence: zgpg30  
Solvent: CDCl3  
Ambient Temperature  
File: wen-2-22AC  
INOVA-500 "epoxide"

Relax. delay 1.500 sec  
Pulse 39.1 degrees  
Acq. time 0.800 sec  
Width 20000.0 Hz  
200 Repetitions  
OBSERVE C13, 75.423287 MHz  
DECUPLE H1, 299.594859 MHz  
Power 36 dB  
CONTINUOUSLY ON  
Not Frequency Modulated  
DATA PROCESSING  
Line broadening 1.0 Hz  
FT size 32768  
Total time 30 min, 47 sec

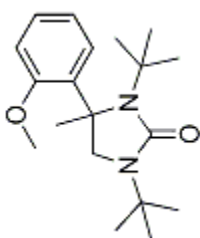

Table 1, entry 3

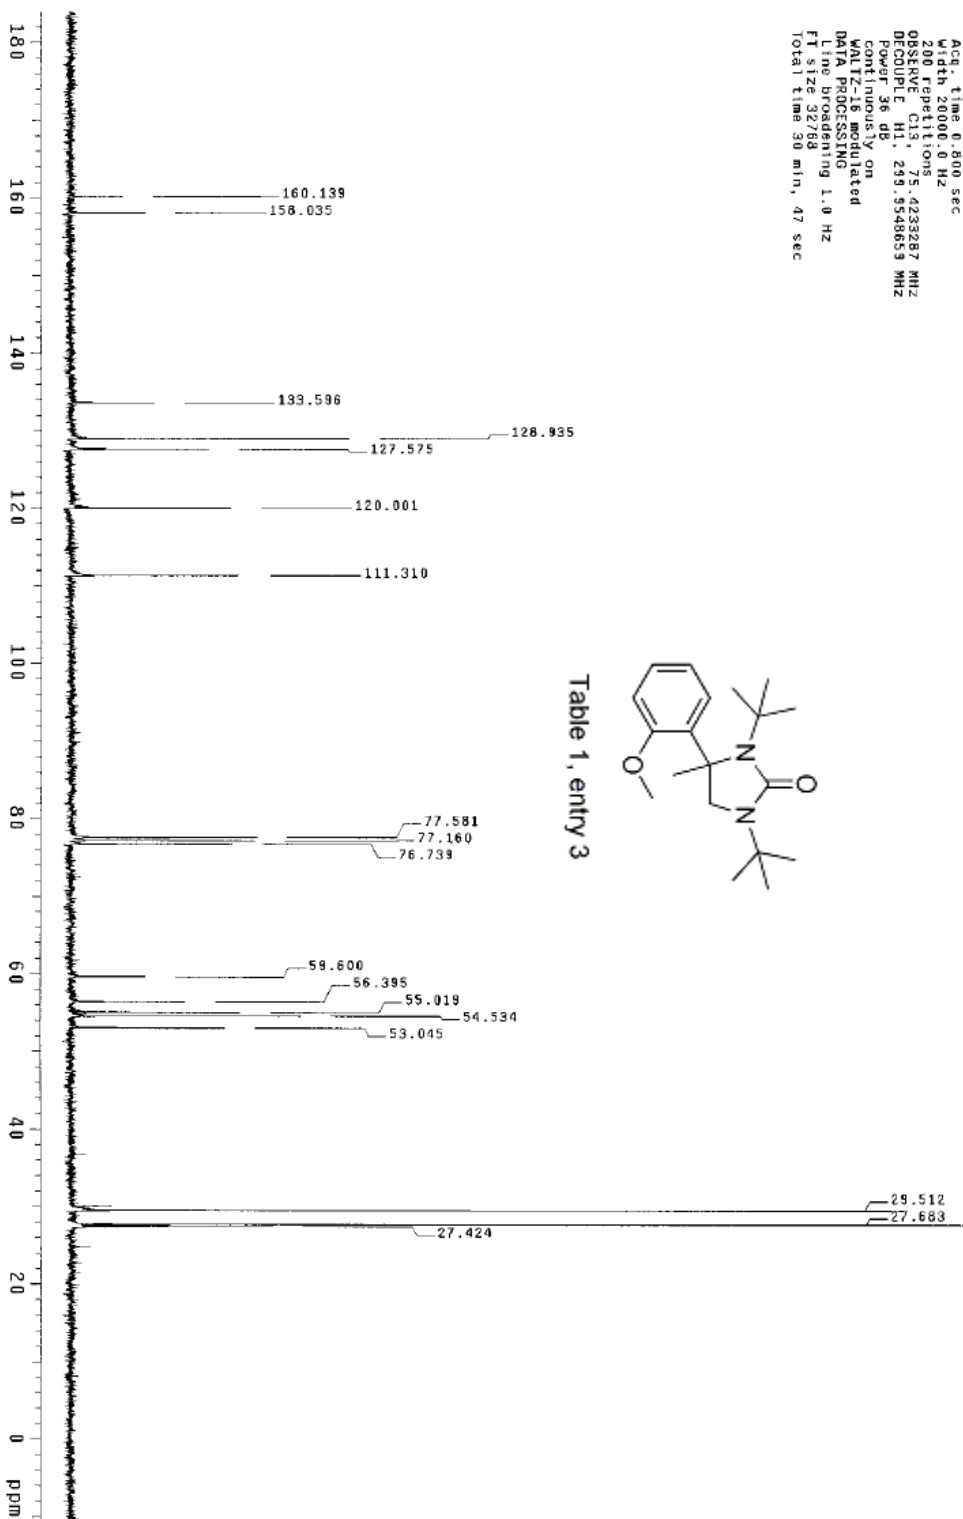

STANDARD 1H OBSERVE

Pulse Sequence: szpul1  
Solvent: CDCl3  
Sample Name: 17A11  
File: wch-2-17A11  
INDVA=500 "epoxide"  
Relax: delay 1.000 sec  
Acq: time 2.720 sec  
Width: 6000.6 Hz  
Observed F1: 99.995 MHz  
Observed F2: 99.995 MHz  
DATA PROCESSING  
Gain: amplification 0.835 sec  
File size: 65536  
Total time 0 min, 37 sec

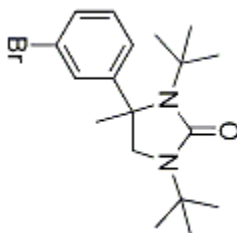

Table 1, entry 4

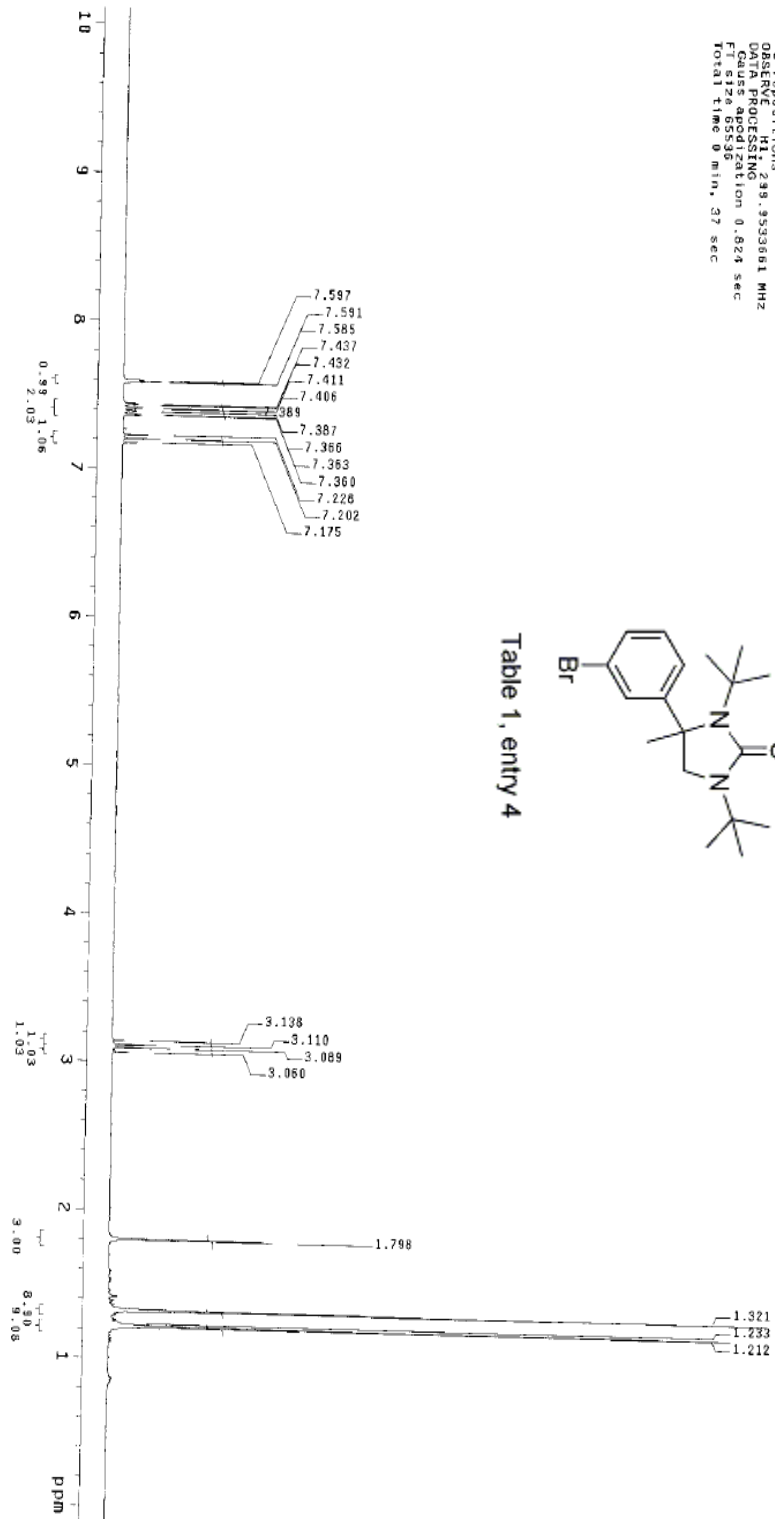

13C OBSERVE

Pulse Sequence: s2pul  
Solvent: CDCl3  
Ambient Temperature  
File: ven-2-17ACC  
INOVA-500 "epoxide"

Relax. delay 1.700 sec  
Pulse 44.5 degrees  
Acq. time 0.533 sec  
Width 30018.8 Hz  
Observer C13  
OBSERVE C13  
DECUPLE H1  
Power 42 dB  
continuously on  
WALTZ-16 modulated  
DATA PROCESSING  
Line broadening 2.0 Hz  
F1 size 32798  
Total time 29 min, 53 sec

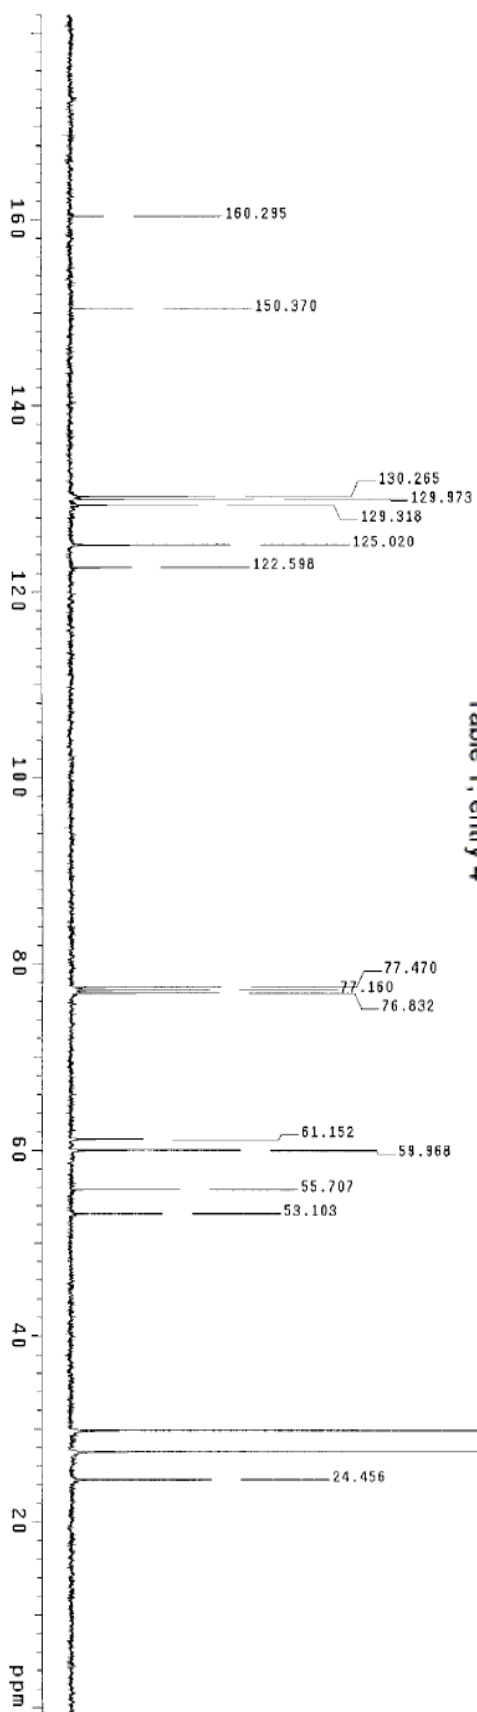

Table 1, entry 4

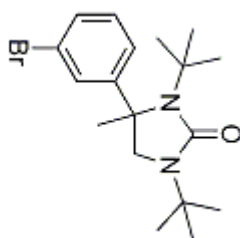

STANDARD 1H OBSERVE

Pulse Sequence: s2pu1

Solvent: CDCl3

Acq. date: 11/11/01

File: ugn-2-bbh

INOVA-500 "epoxide"

Pulse 31.0 degrees

Acq. time 2.291 sec

Width 6882.6 Hz

8 repetitions 100.1069260 MHz

Observed 400.1069260 MHz

Observed 100.6281170 MHz

Gauss 900000000

Gauss 900000000

FT size 65536

Total time 0 min, 23 sec

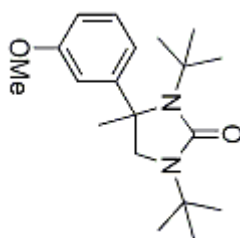

Table 1, entry 5

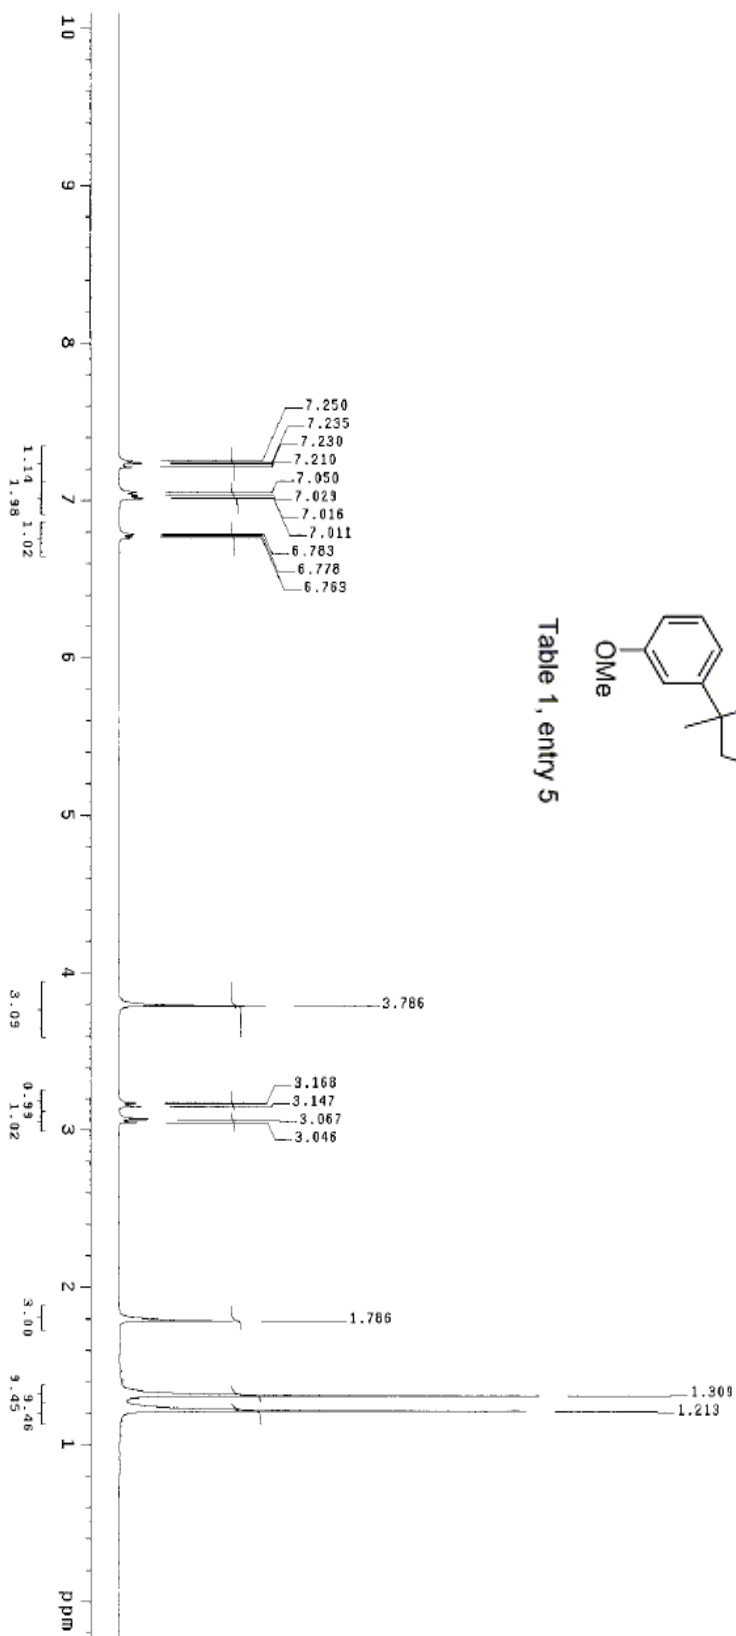

13C OBSERVE

Pulse Sequence: s2pul

Solvent: CDCl3

Acq. Temperature

INDVA-500 "epoxide"

Relax. delay 1.700 sec

Pulse 44.5 degree

Acq. time 0.533 sec

Width 30018.8 Hz

420 repetitions

ORCOMP 0.1, 400.1083238 MHz

Power 42 dB

continuously on

WALTZ-16 modulated

DATA PROCESSING

Line broadening 2.0 Hz

Total time 29 min, 53 sec

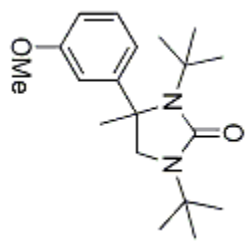

Table 1, entry 5

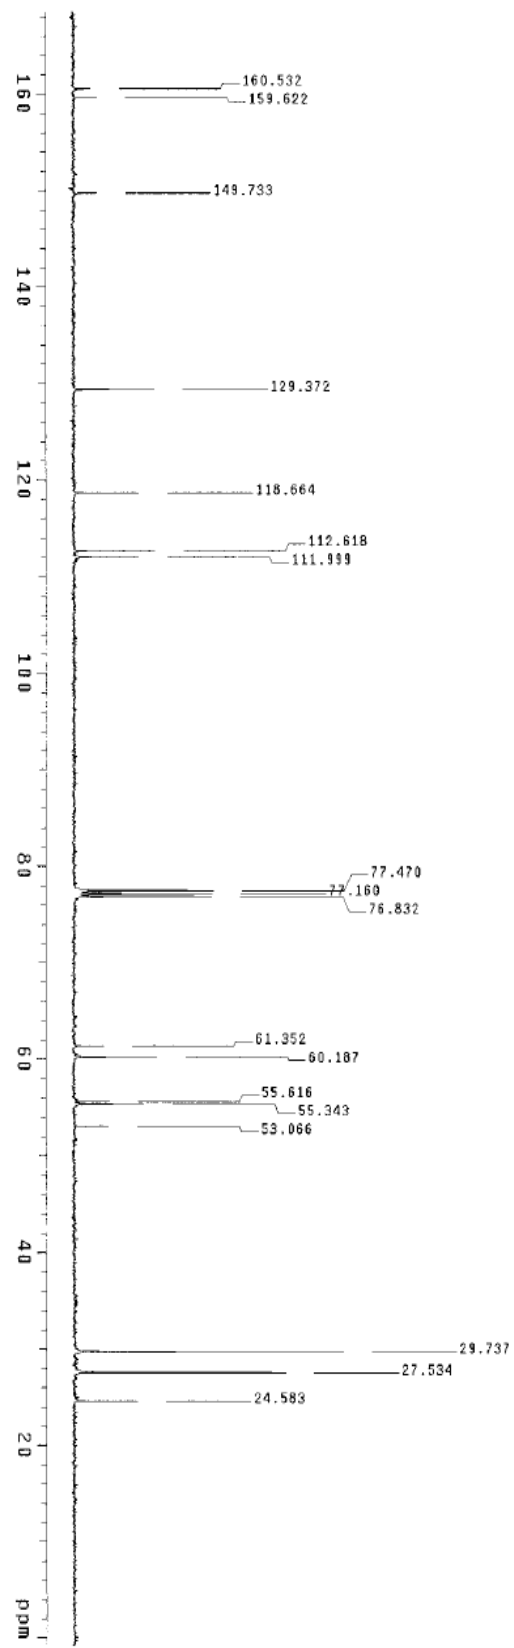

STANDARD 1H OBSERVE

Pulse Sequence: s2pu1

Solvent: CDCl3

Acq: time 2.732 sec

File: ven-2-17BH

INOVA-500 "spoxide"

Relax. delay 1.000 sec

Pulse 34.0 degrees

Acq: time 2.732 sec

8 repetitions

DATA PROCESSING

OSERVE HI 299.9533661 MHz

Gauss apodization 0.824 sec

File size 65336

Total time 9 min, 37 sec

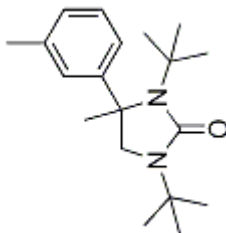

Table 1, entry 6

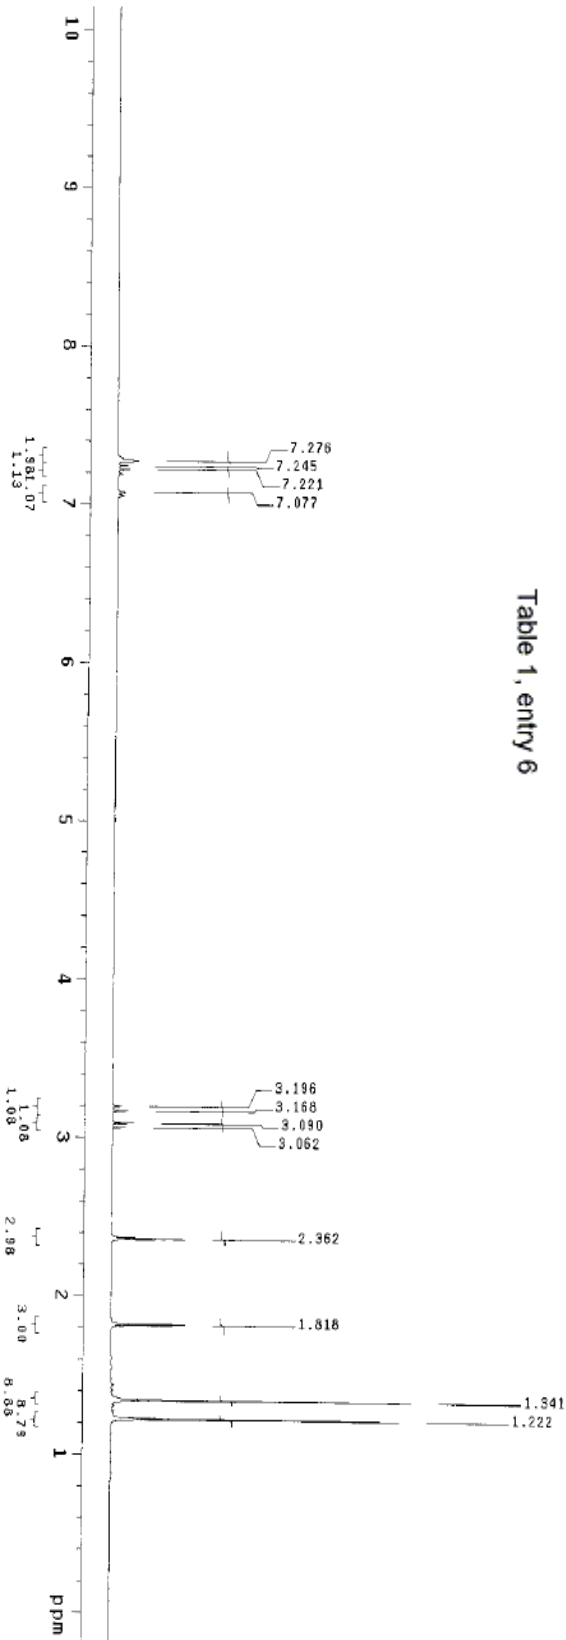



13C DBSERVE

Pulse Sequence: s2pu1

Solvent: CDCl3

Ambient Temperature

File: Wm-2-17DC

INOVA-500 "EpoXide"

Relax. delay 1.500 sec

Pulse 39.1 degrees

Acq. time 0.800 sec

200 repetitions

DBSERVE C13 75.4233275 MHz

DECOUPLE H1 289.8546659 MHz

Power 36 dB

continuously on

WALTZ-16 modulated

DATA PROCESSING

Line Broadening 1.0 Hz

File size 32768

Total time 50 min, 47 sec

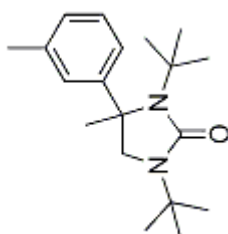

Table 1, entry 6

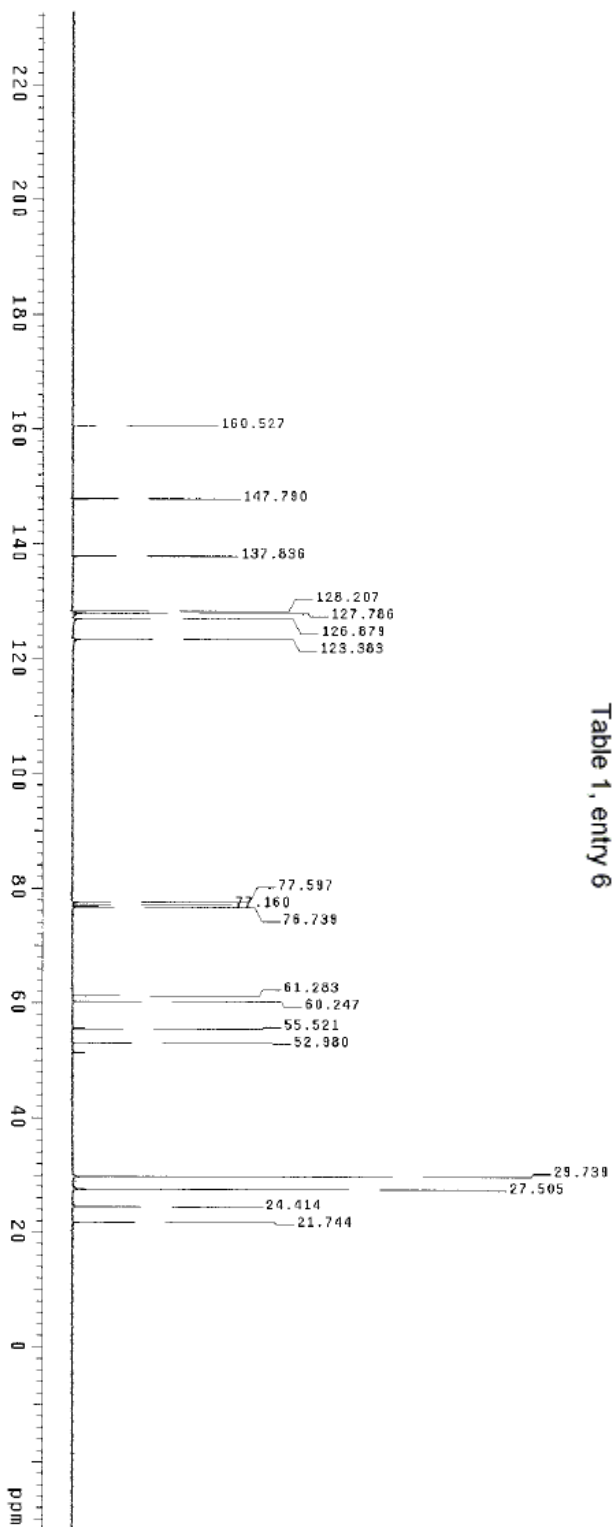

STANDARD 1H OBSERVE

Pulse Sequence: szpu1

Solvent: CDCl3

Acq. Temp: 29.84

File: spn-200804

INOVA-500 "spokids"

Pulse 31.0 degrees

Acq. time 2.291 sec

Width 6982.6 Hz

8. Frequency 100.626130 MHz

DATA ACQUISITION 1063250 MHz

DATA PROCESSING

Gauss apodization 0.971 sec

FI size 65536

Total time 0 min, 23 sec

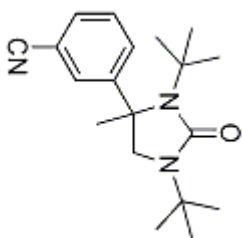

Table 1, entry 7

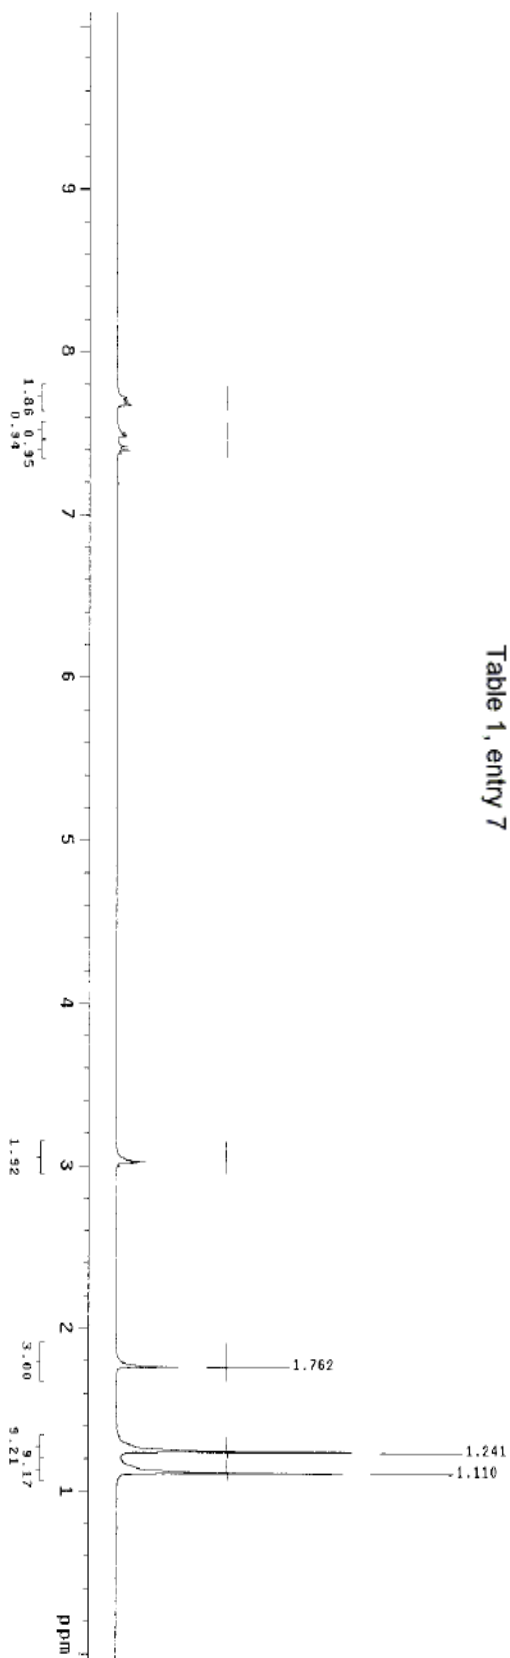



STANDARD 1H OBSERVE

Pulse Sequence: s2pu1

Solvent: CDCl3  
Acquisition Temperature  
File: Men-2-58H  
INOVA-500 "epoxide"

Pulse 31.0 degrees  
Acq. time 2.291 sec  
Width 6982.6 Hz  
8 Repetitions  
Observed 100.1063260 MHz  
DATA PROCESSING  
Gauss apodization 0.971 sec  
FI size 69536  
Total time 0 min, 29 sec

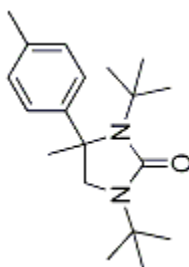

Table 1, entry 8

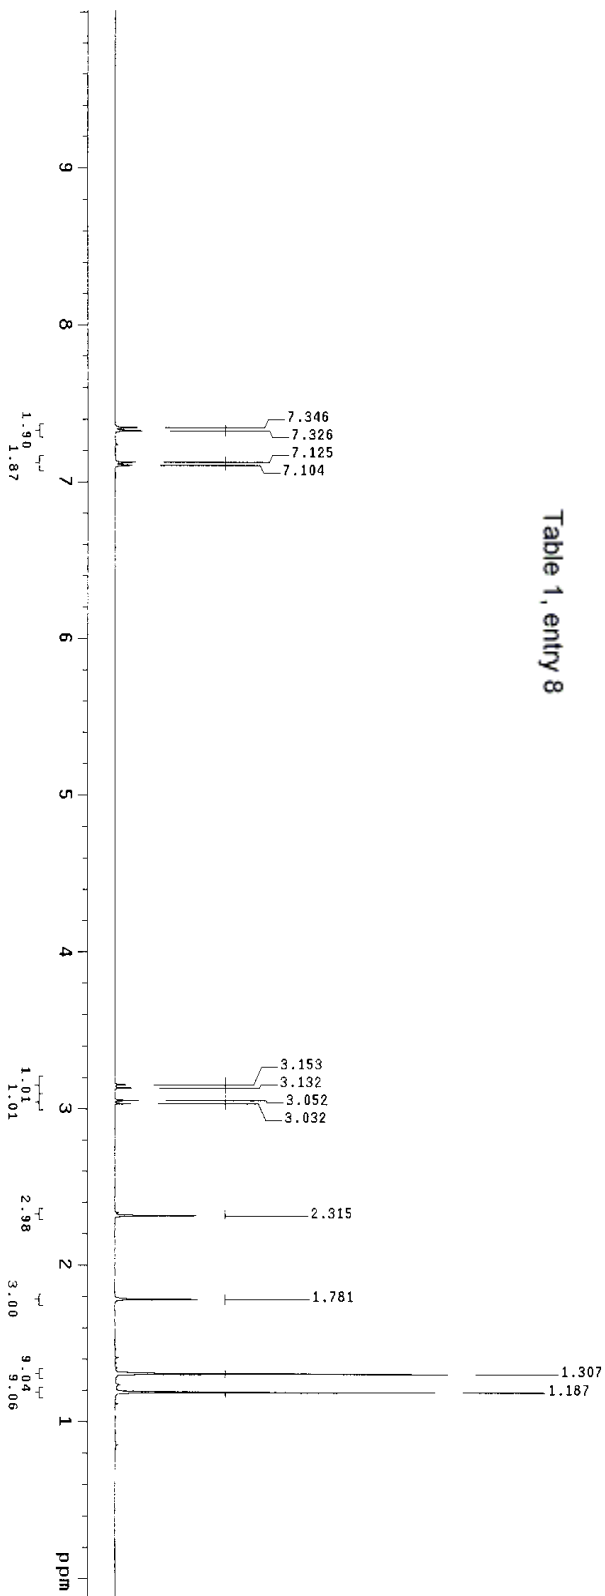

13C OBSERVE

Pulse Sequence: scpul

Solvent: CDCl3

Temperature

INOVA-500

Relax. delay 1.700 sec  
Pulse 44.5 degrees  
Acq. time 0.533 sec  
Wden 30018.8 Hz  
OBSERVE C13 100.668030 MHz  
DECUPLE H1 400.1083288 MHz  
Power 42 dB  
CONTINUOUSLY ON  
NMR Unit: 101  
DATA PROCESSING  
Line broadening 2.0 Hz  
FT size 32768  
Total time 28 min, 53 sec

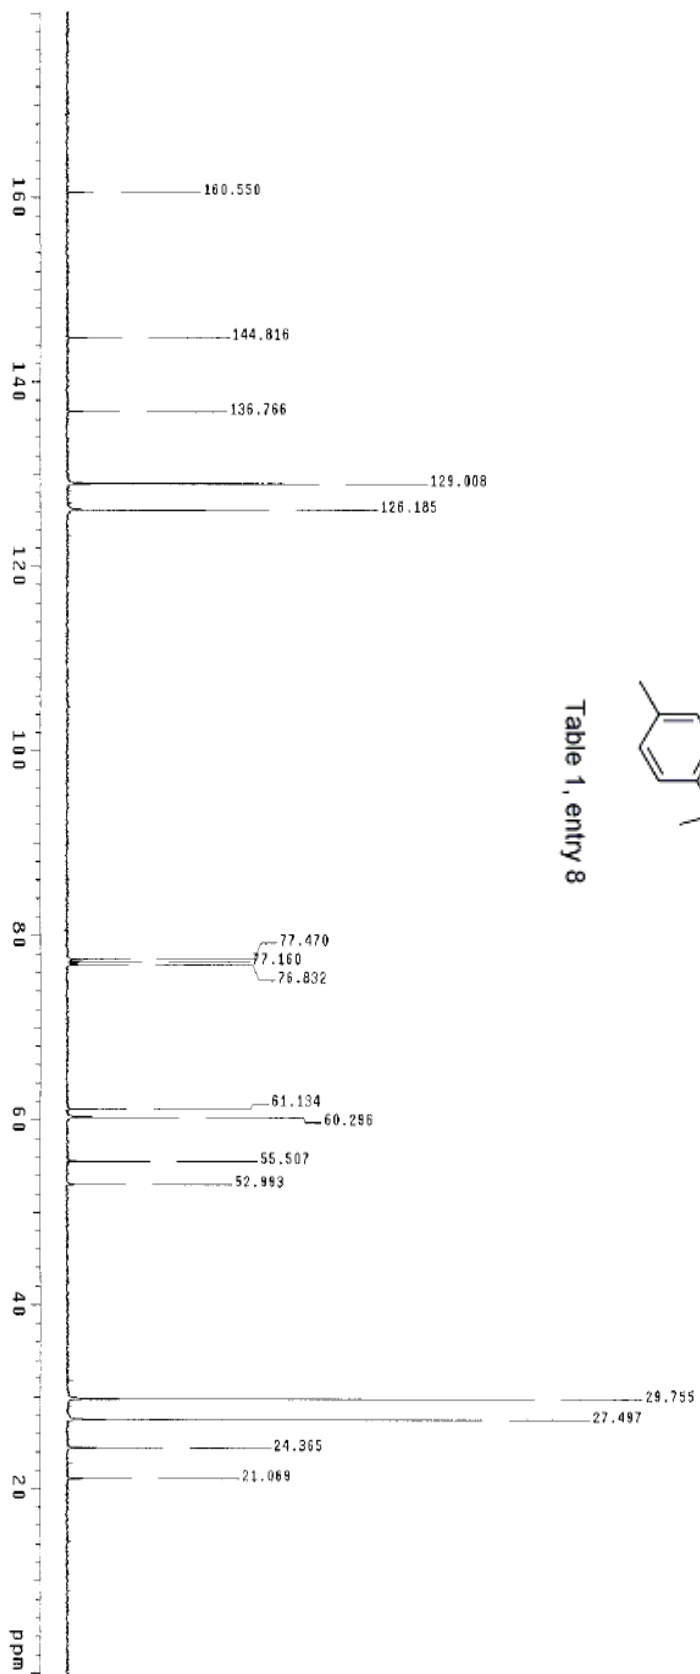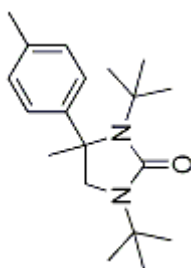

Table 1, entry 8

STANDARD 1H OBSERVE

Pulse Sequence: szpu1

Solvent: CDCl3

Ambient temperature

File: wcn-2-5ah

INOVA-500 "epoxide"

Pulse 31.0 degrees

Acq. time 2.291 sec

Width 6982.6 Hz

ORSE RPT 11/14/00.1063360 MHZ

DATA PROCESSING

Gauss apodization 0.971 sec

FT size 65536

Total time 0 min, 23 sec

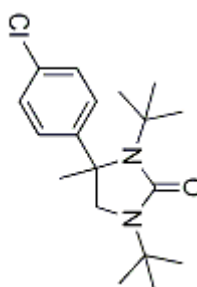

Table 1, entry 9

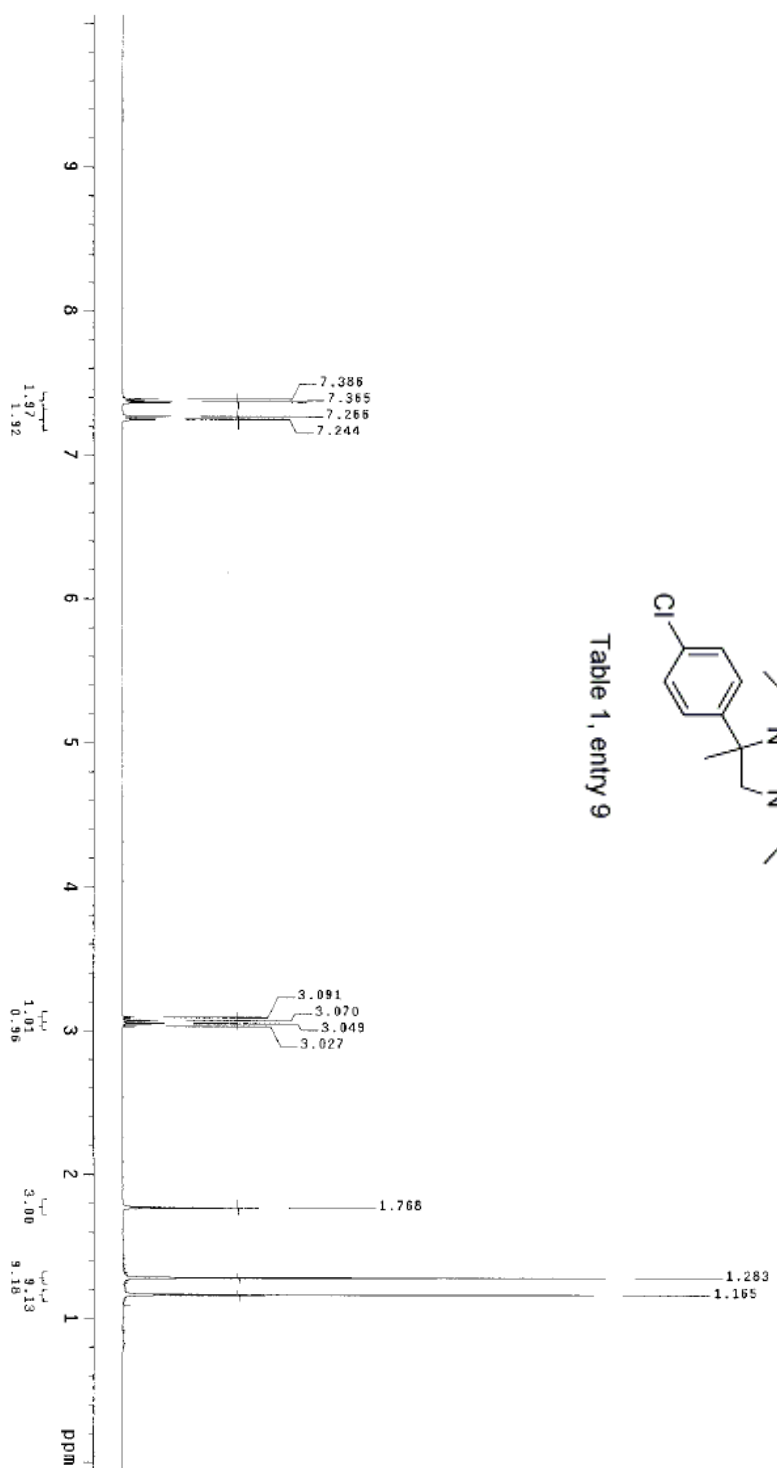

13C OBSERVE

Pulse Sequence: szpul  
Solvent: CDCl3  
Ambient temperature  
File: wcn-2-5AC  
INDWA-500 "epoxid.m"

Relax. delay 1.700 sec  
Pulse: 14.50 deg sec  
Pulse 2: 14.50 deg sec  
Width 30018.8 Hz  
152 repetitions  
OBSERVE C13, 100.608030 MHz  
DECUPLE H1, 400.1083268 MHz  
Power: 42.00 dB  
Pulse program: wcn  
WAIT-16 modulated  
DATA PROCESSING  
Line broadening 2.0 Hz  
FT size: 32768  
Total time 29 min, 53 sec

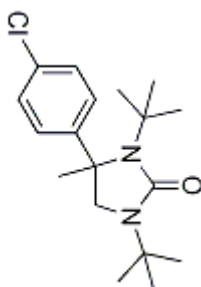

Table 1, entry 9

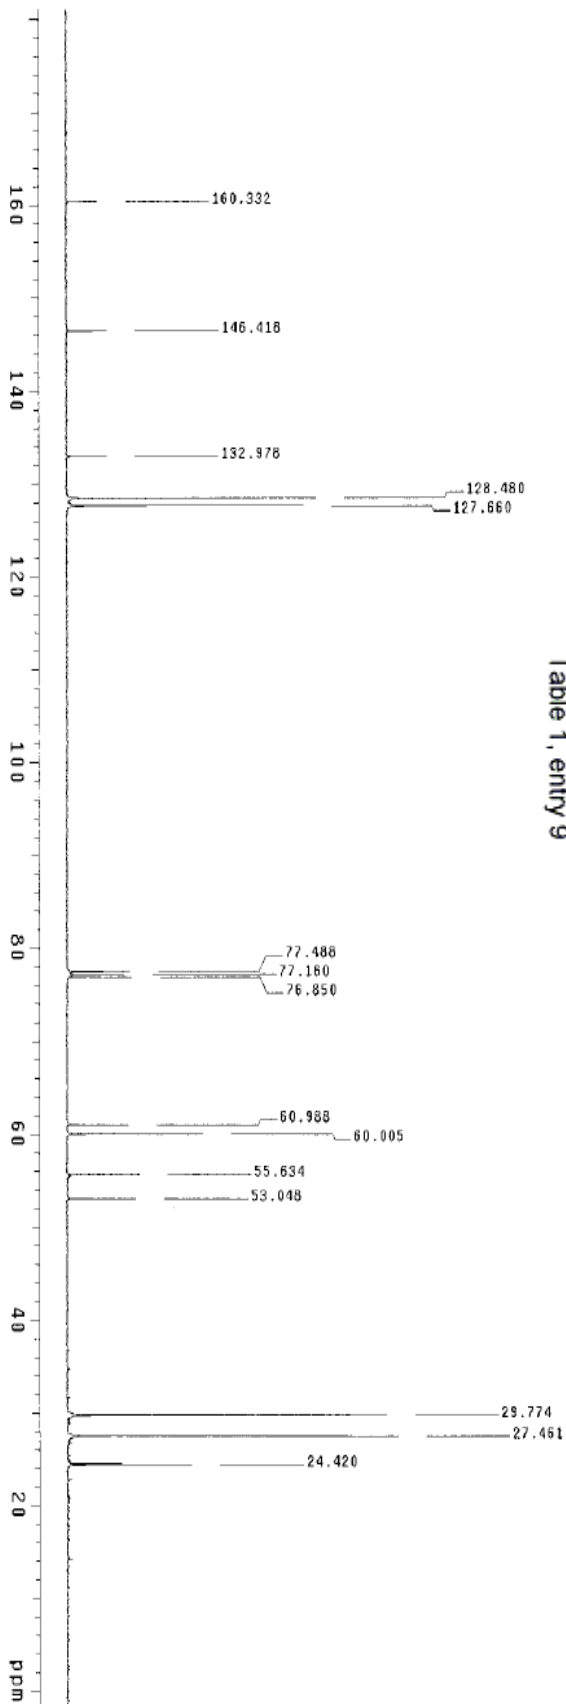

STANDARD 1H OBSERVE

Pulse Sequence: s2put  
 Solvent: CDCl3  
 Ambient temperature  
 File: wnt-2-19AH  
 INOVA-500 "epoxide"

Relax. delay 1.000 sec  
 Acq. time 2.732 sec  
 Width 5000.6 Hz  
 # repetitions 8  
 OBSERVE H1: 299.8533661 MHz  
 DATA PROCESSING  
 F1 size 65526  
 Total time 0 min, 37 sec

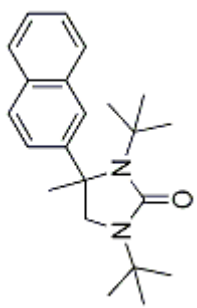

Table 1, entry 10

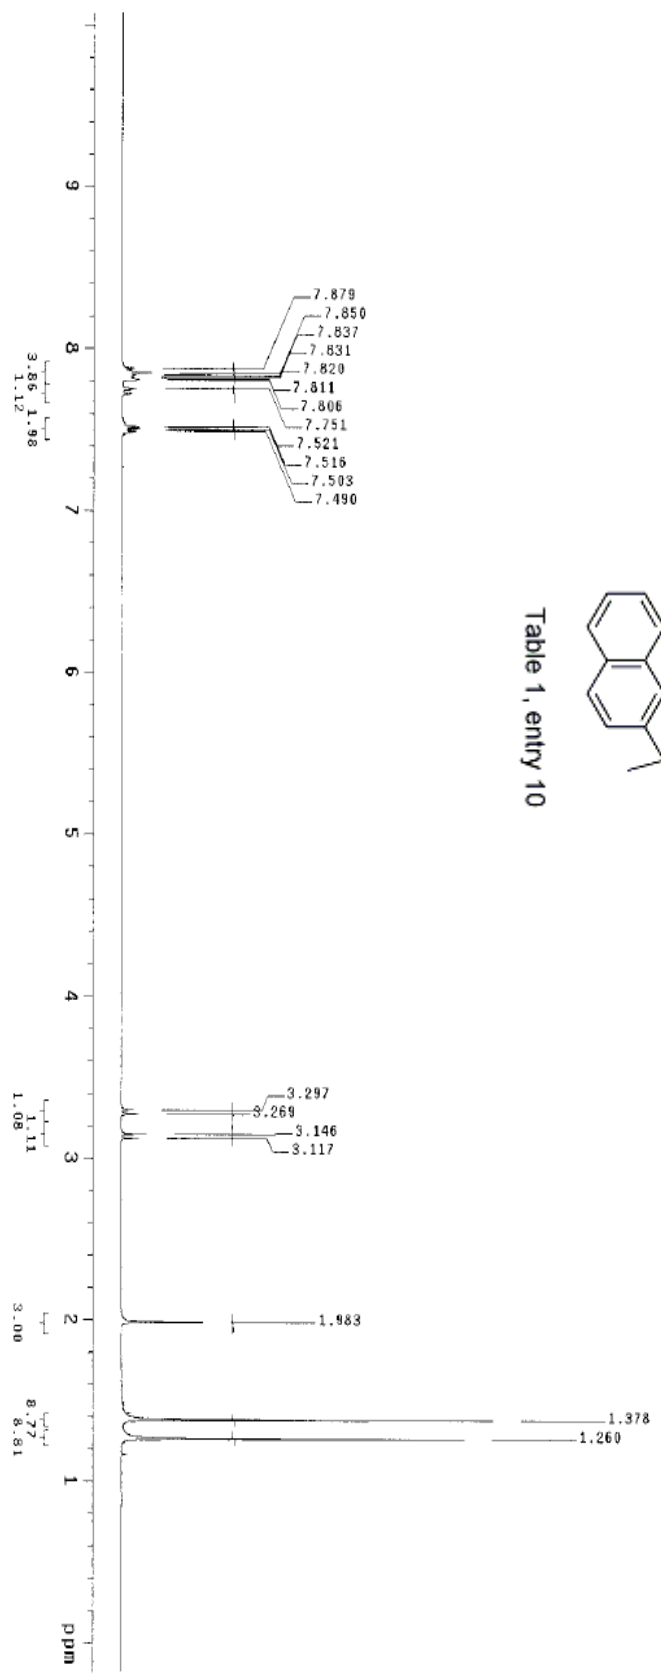



13C OBSERVE

Pulse Sequence: szpau  
Solvent: CDCl3  
Ambient temperature  
File: wcn-2-19AC  
INOVA-500 "epoxide"

Relax. delay 1.500 sec  
Acq. time 1.440 sec  
Width 20000.0 Hz  
200 repetitions  
OBSERVE C13, 75.4233263 MHz  
DECUPLE H1, 299.9548659 MHz  
Continuously  
WALTZ-16 modulated  
DATA PROCESSING  
Line broadening 1.0 Hz  
FT size 32768  
Total time 30 min, 47 sec

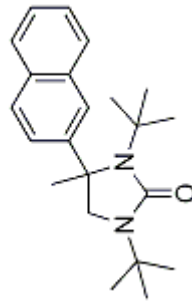

Table 1, entry 10

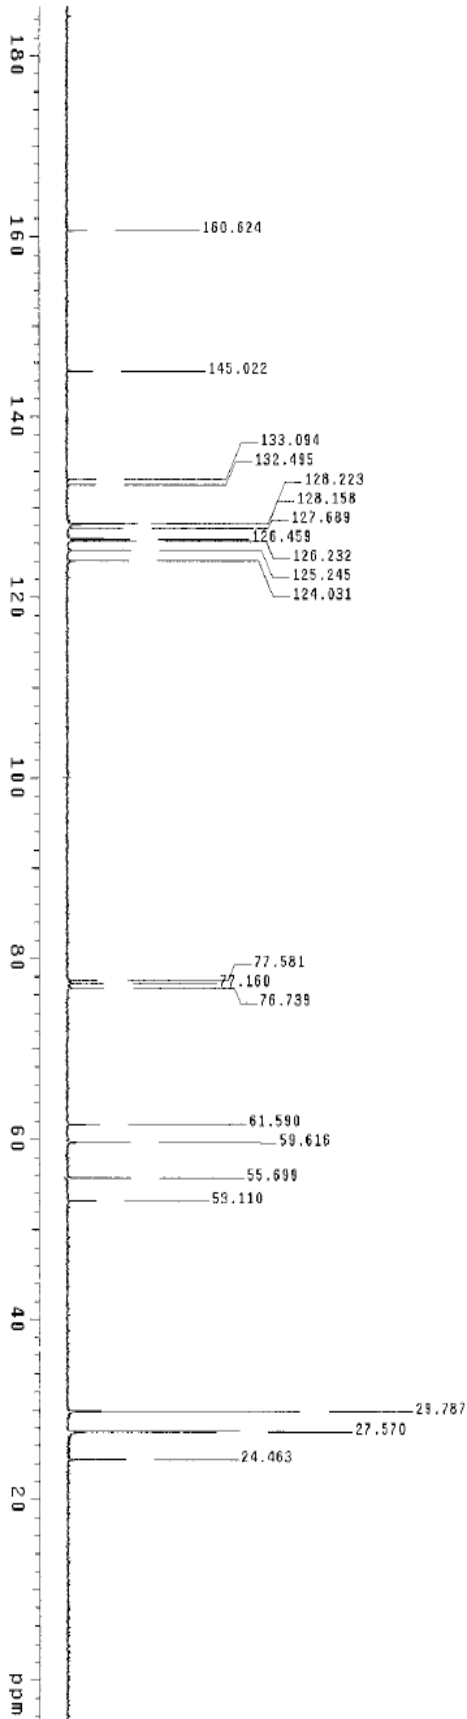



13C OBSERVE

Pulse Sequence: s2put

Solvent: CDCl3

Acquire Temperature

File: s2put\_2\_7Ac

INOVA-500 "epoxide"

Relax. delay 1.500 sec  
Pulse: 32.1 degrees  
Pulse: 32.1 degrees  
Width 20000.0 Hz  
116 repetitions  
OBSERVE C13, 75.4233275 MHz  
DECOUPLE H1, 239.5546654 MHz  
Power 36 db  
continuously on  
WALTZ-16 modulated  
DATA PROCESSING  
Line broadening 1.0 Hz  
F1 size 32768  
Total time 30 min, 47 sec

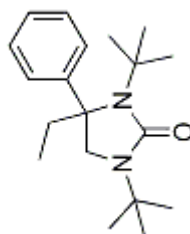

Table 1, entry 11

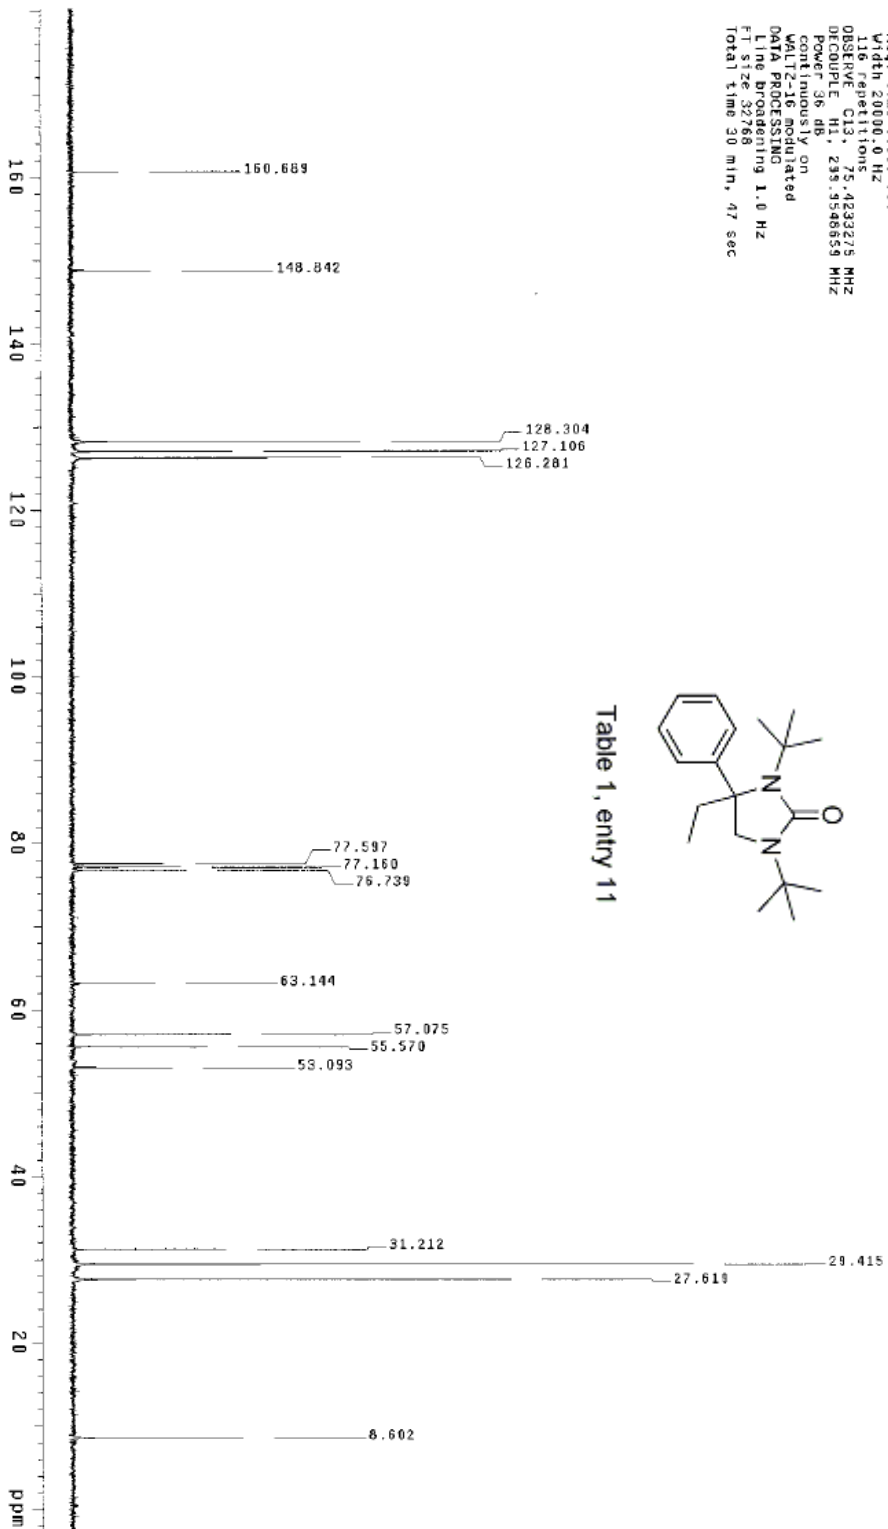

STANDARD 1H OBSERVE

Pulse Sequence: s2pul1  
 Solvent: CDCl3  
 Ambient temperature  
 File: Wen-2-741H  
 INOVA-500 "epoxide"

Relax: delay 1.000 sec  
 Pulse: 14.000 sec  
 Acq: time 2.592 sec  
 Width 6000.6 Hz  
 8 repetitions

OBSERVE: 299.9533661 MHz  
 DATA PROCESSING: 0.824 sec  
 File size: 65536  
 Total time 0 min, 37 sec

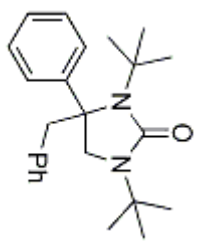

Table 1, entry 12

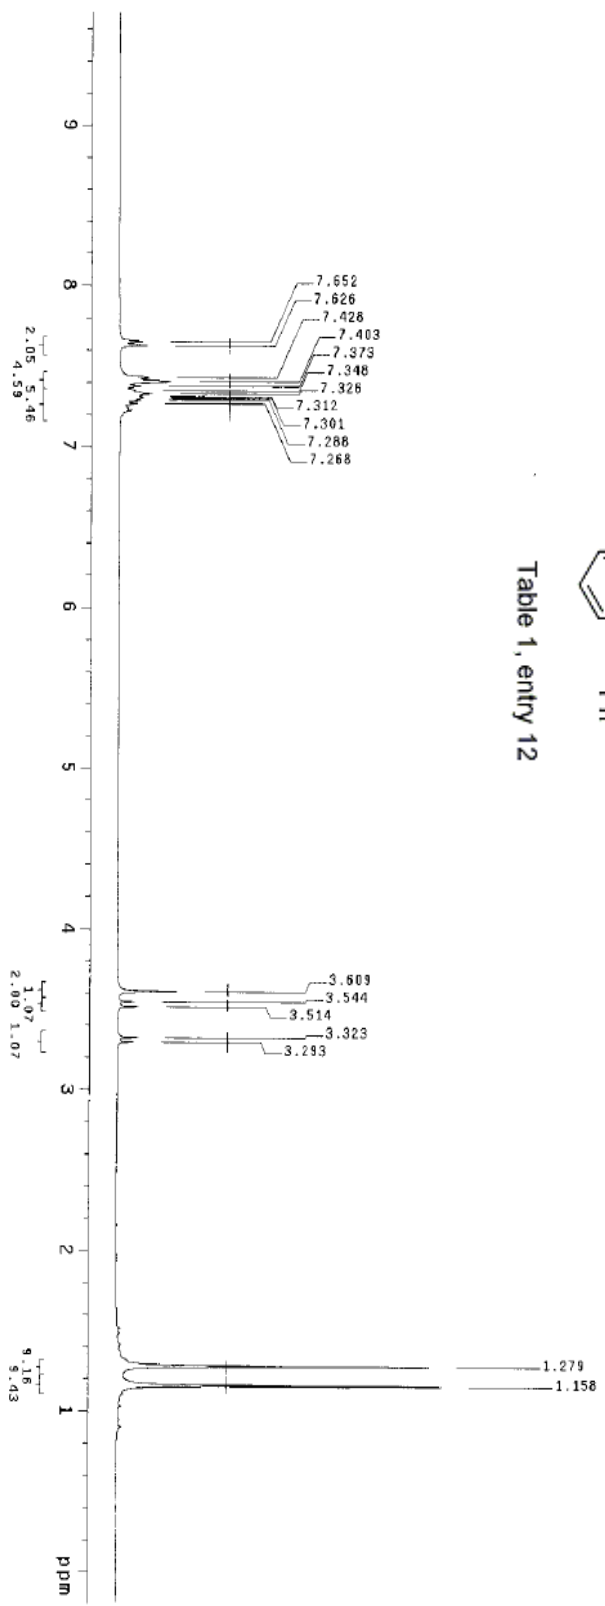

13C OBSERVE

Pulse Sequence: zgpg30  
Solvent: CDCl3  
Ambient temperature  
File: w9n-2-78c  
INOVA-500 "epoxidizer"  
Relax: delay 1.500 sec  
Puls: 1.000 sec  
Acq: time 0.800 sec  
Width 20000.0 Hz  
420 repetitions  
OBSERVE G13: 75.4233251 MHz  
PULSE 16: 289.3508859 MHz  
continuously on  
WALTZ-16 modulated  
DATA PROCESSING  
F1: 289.3508859 MHz  
F2: 75.4233251 MHz  
Total time 30 min, 47 sec

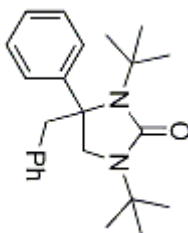

Table 1, entry 12

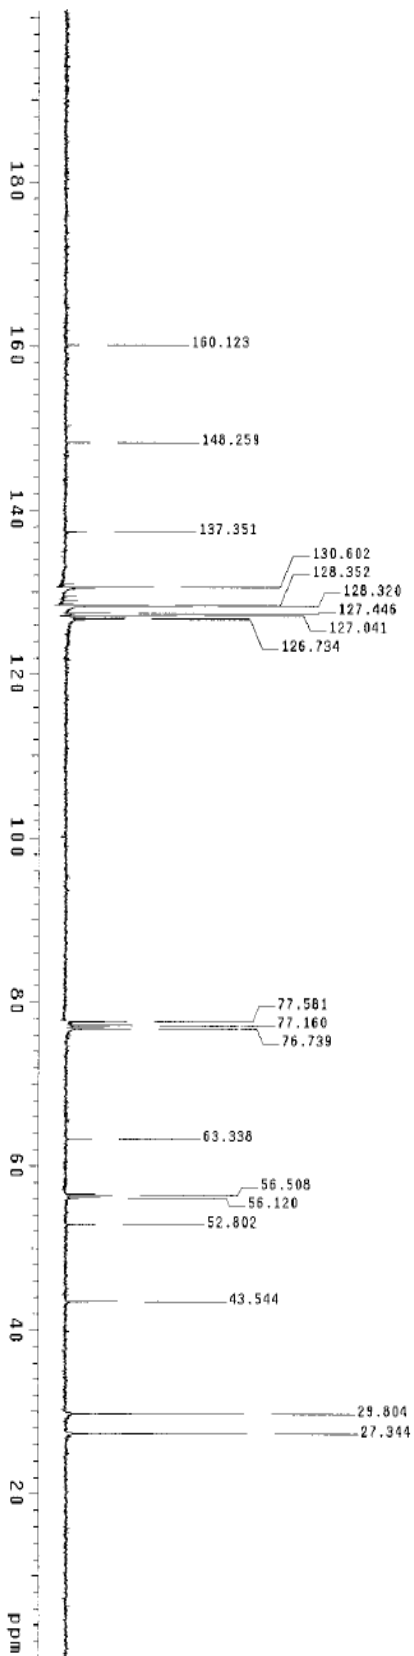



13C OBSERVE

Pulse Sequence: szpu1

Solvent: CDCl3

Ambient Temperature

File: Wm-2-18b1

INOVA-500 "gpx1dc"

Relax. delay 1.700 sec

Pulse: 49.5 deg sec

Width: 30018.8 Hz

120 repetitions

OBSERVE C13, 100.6058085 MHz

DECOUPLE H1, 400.1033268 MHz

Power 42 dB

continuously on

WALTZ16 modulated

DATA PROCESSING

Line broadening 2.0 Hz

FT size 32768

Total time 29 min, 53 sec

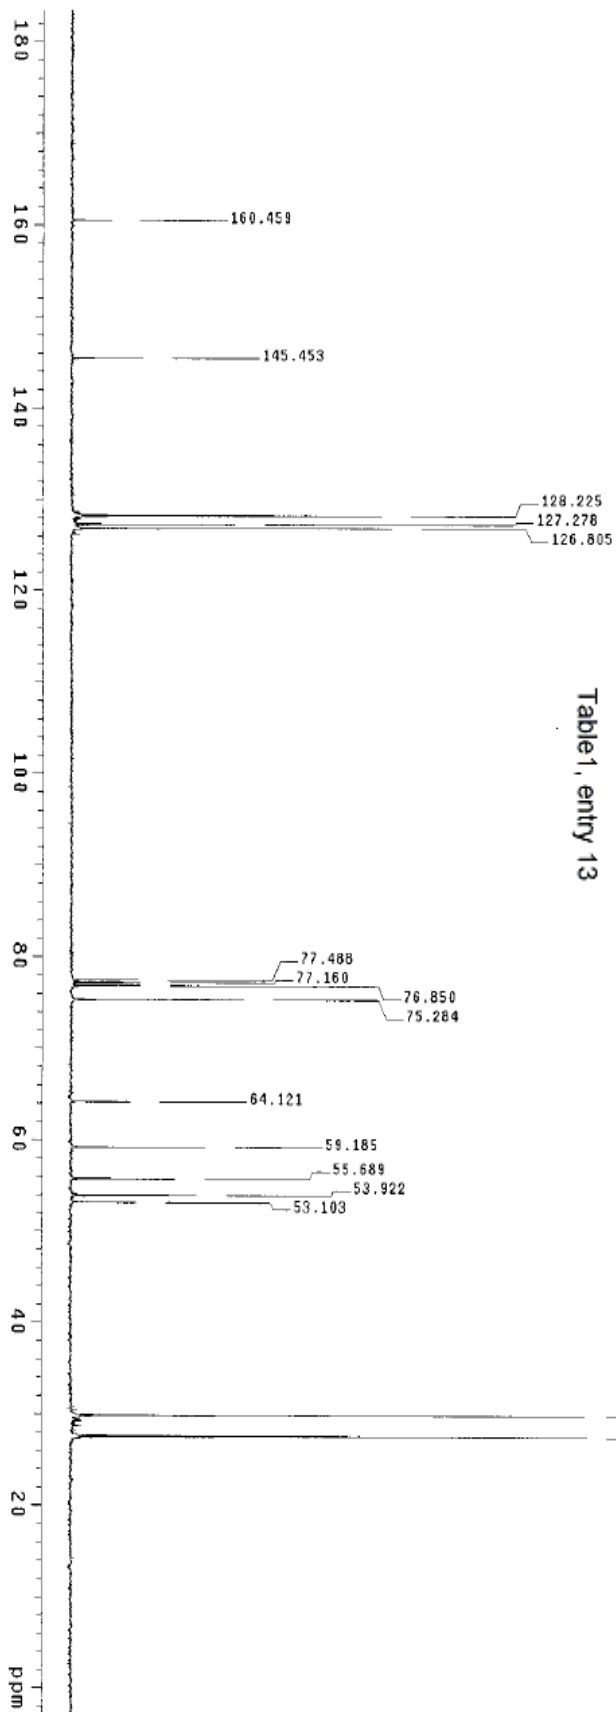

Table 1, entry 13

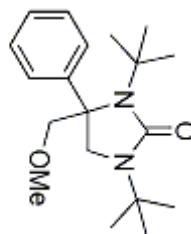

STANDARD 1H OBSERVE

Pulse Sequence: s2pul  
 Solvent: CDCl3  
 Ambient temperature  
 F1 nu: 400 MHz  
 INOVA-500 "Proxide"

Relay: delay 1.000 sec  
 pulse 34.0 degrees  
 Acq. time 2.732 sec  
 Width 6000.6 Hz  
 8 repetitions  
 OBSERVE: H1: 298.9533661 MHz  
 DATA ACQUISITION 0.824 sec  
 FT size 65536  
 Total time 0 min, 37 sec

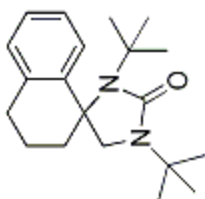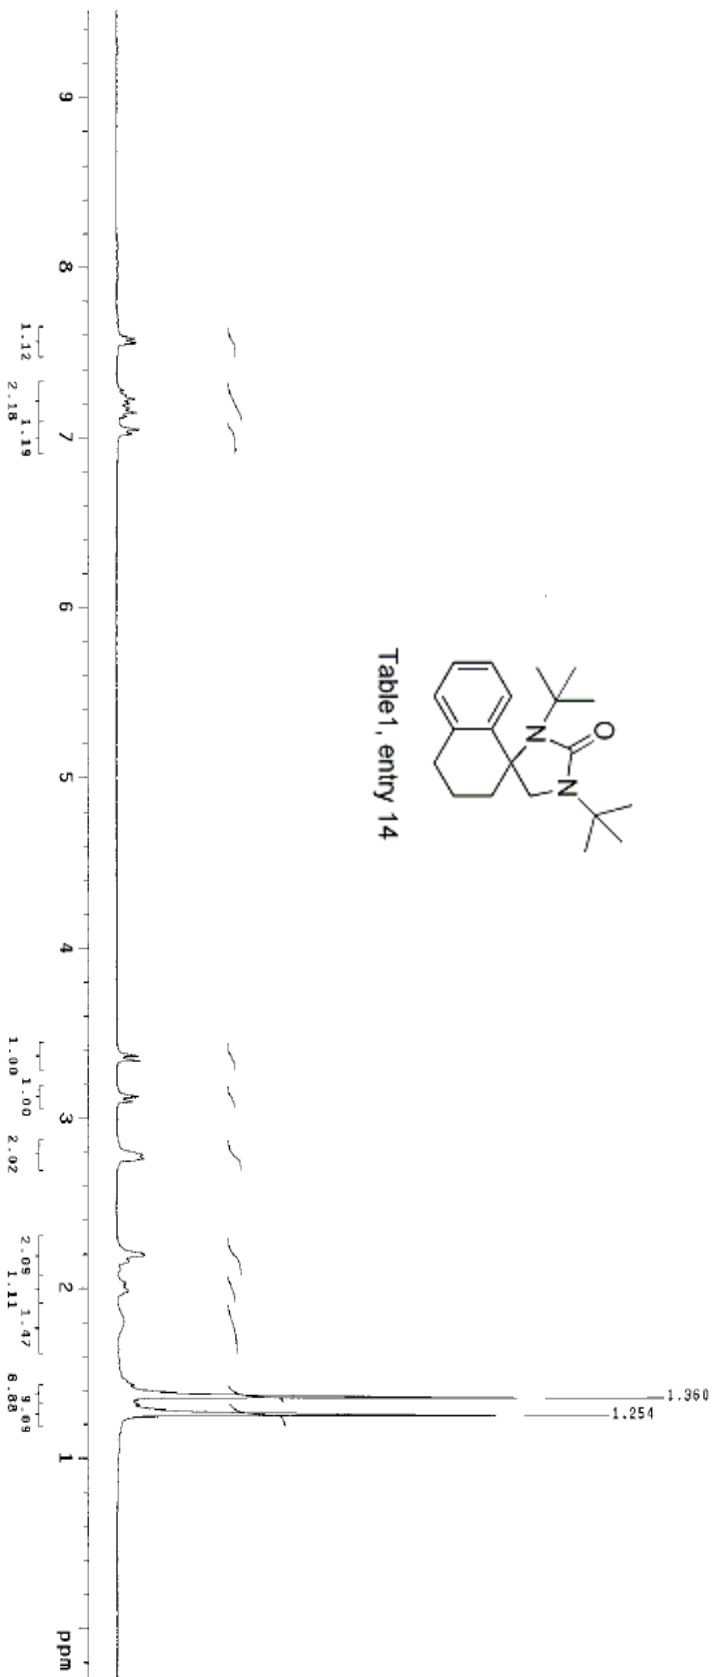



13C OBSERVE

Pulse Sequence: zgpg30

Solvent: CDCl3

Sample Name: 14

File: Men-2-228C

INOVA-500 "epoxide"

Relax. delay 1.500 sec

Pulse 39.1 degrees

Acq. time 0.800 sec

Width 20000.0 Hz

Observer C13

DECOUPLE M1, 259.5548659 MHz

Power 36 dB

Continuously on

DATA ACQUISITION

Line broadening 1.0 Hz

FT size 32768

Total time 30 min, 47 sec

Table 1, entry 14

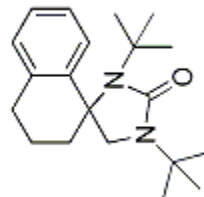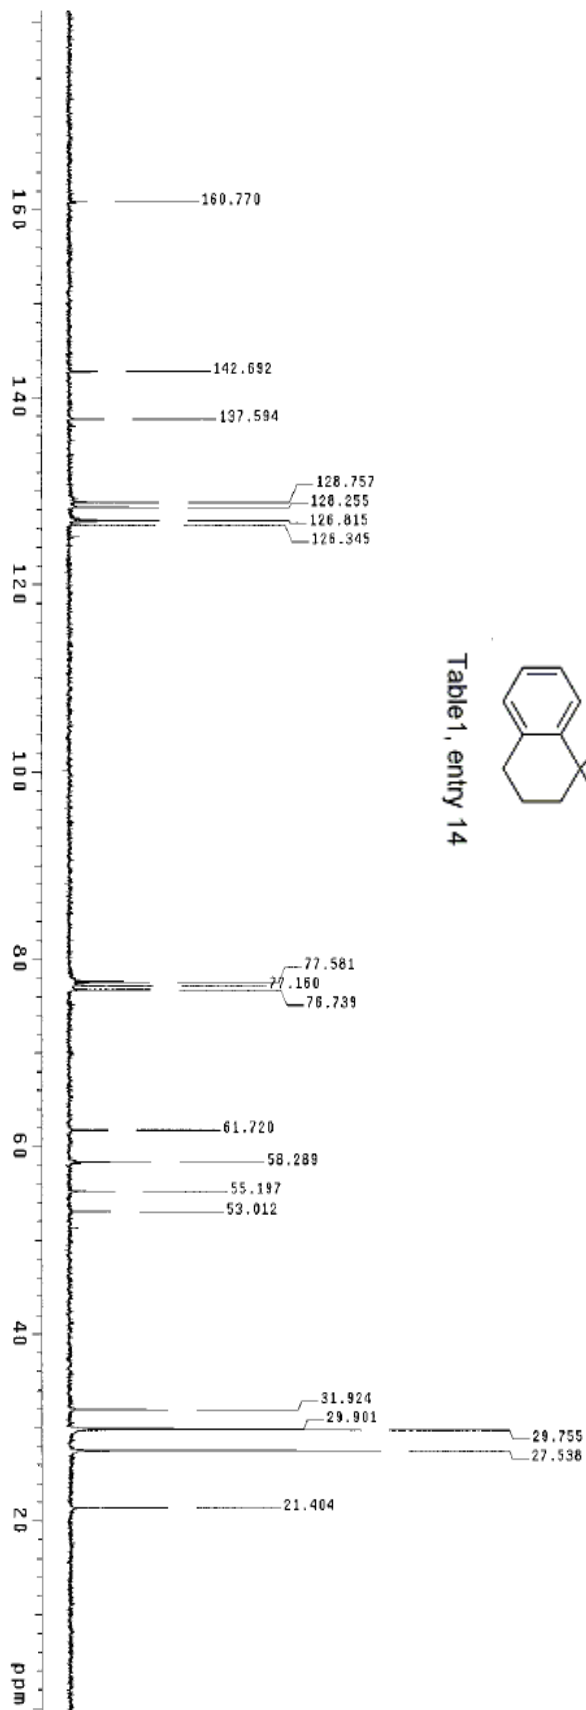

STANDARD IN OBSERVE

Pulse Sequence: s2pu1  
Solvent: CDCl3  
Ambient Temperature  
File: Wen-2-14B  
INOVA-500 "epoxide"  
Relax. delay 1.000 sec  
Pulse 34.0 degrees  
Acq. time 2.732 sec  
Width 5000.0 Hz  
Observer HJH  
DATA PROCESSING  
Gauss apodization 0.824 sec  
FT size 65536  
Total time 0 min, 37 sec

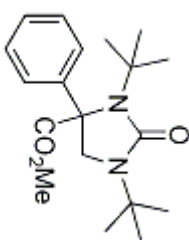

Table 1, entry 15

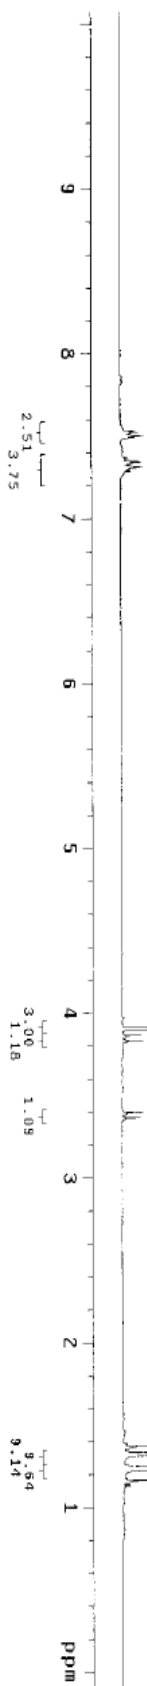

13C OBSERVE

Pulse Sequence: szpu1

Solvent: CDCl3

Ambient temperature

File: Wen-2-14BC2

INOVA-500 "epoxide"

Relax. delay 1.000 sec

Pulse 46.3 degrees

Acq. time 0.697 sec

400th 42837.8 Hz

240th 42837.8 Hz

OBSERVE C13 on 75.4750885 MHz

DECOUPLE H1, 300.1606799 MHz

Power 40 dB

continuously on

WALTZ-16 modulated

DATA PROCESSING

File name: szpu1

File size: 32758

Total time 22 min, 44 sec

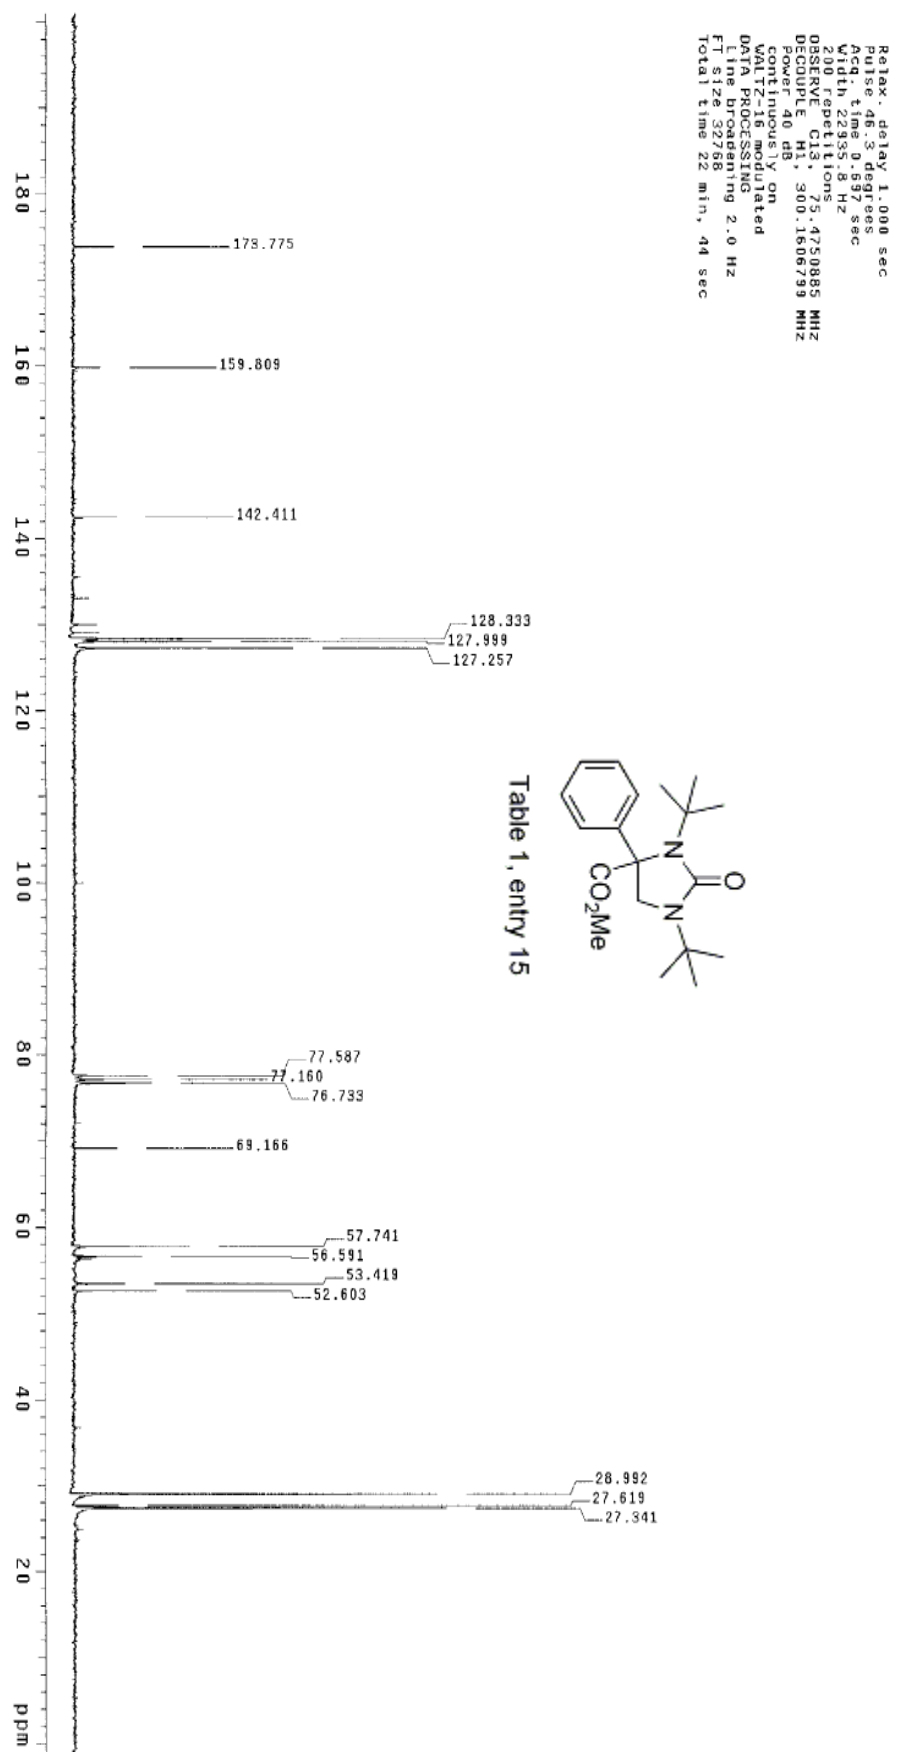

STANDARD 1H OBSERVE

Pulse Sequence: s2pul  
Solvent: CDCl3  
Ambient temperature  
F1s: Wen-2-9AH  
INDVA-500 "epoxide"

Relax. delay 1.000 sec  
Pulse 3d.0 degrees  
Acq. time 2.732 sec  
Width 6000.8 Hz  
OBSERVED F1: 299.9533661 MHz  
DATA PROCESSING  
Gauss apodization 0.824 sec  
F1 size 65528  
Total time 0 min, 37 sec

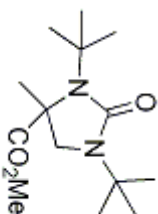

Table1, entry 16

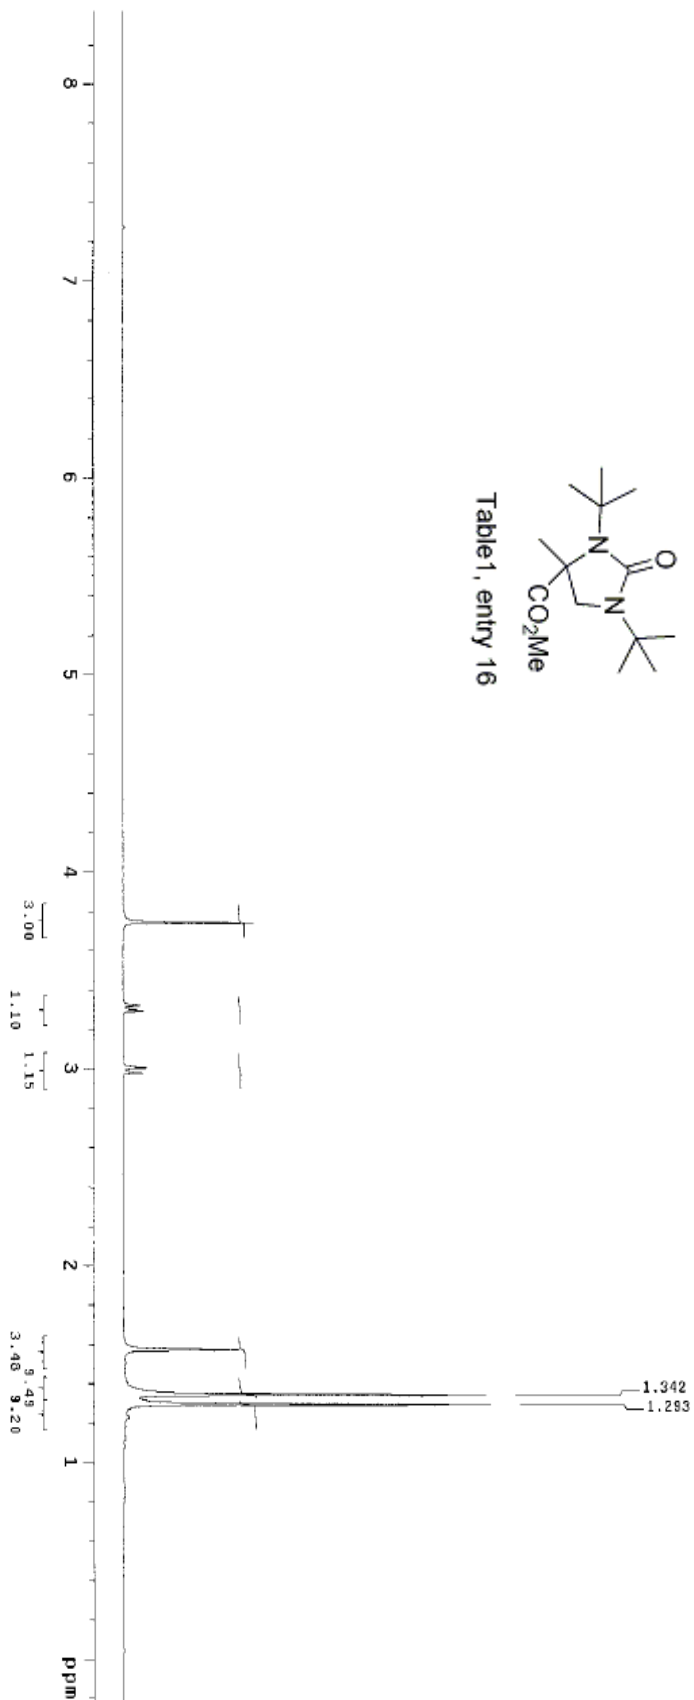

13C OBSERVE

Pulse Sequence: zgpg30

Solvent: CDCl3  
Temperature: 25.00  
Flatten: 2.000  
INOVA-500 "epoxide"

Relax: delay 1.500 sec  
Pulse: 35.1 degrees  
Acq: time 0.800 sec  
Width: 20000.0 Hz  
428 Repetitions  
OBSERVE C13, 75.423263 MHz  
DECOUPLE H1, 299.954853 MHz  
Power: 36.00  
Spectrum: 0.00  
WALTZ16 modulated  
DATA PROCESSING  
Line broadening 1.0 Hz  
FT size 32768  
Total time 30 min, 47 sec

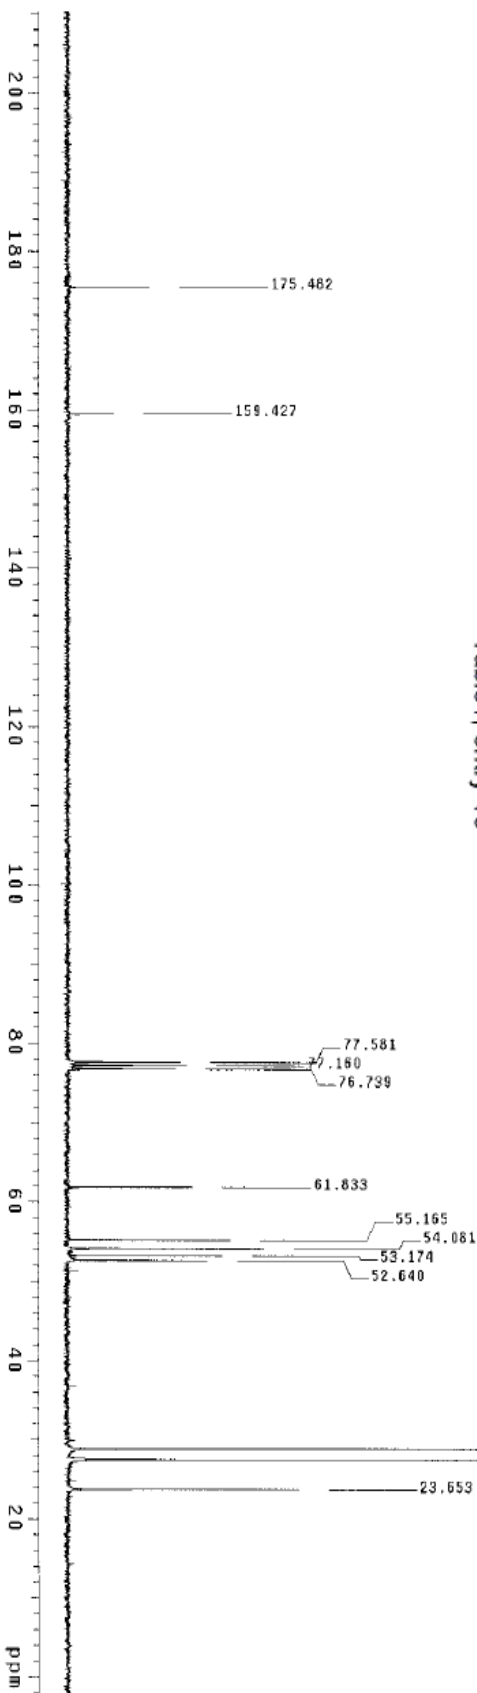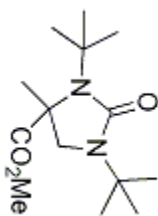

STANDARD 1H OBSERVE  
 Pulse Sequence: s2pul  
 Solvent: CDCl3  
 Ambient Temperature  
 File: Ven-2-noeBh  
 INOVA-500 "epoxide"  
 Pulse 31.0 degrees  
 Width 6982.6 Hz  
 R Repetitions  
 OBSERVE H1.400.1063260 MHZ  
 DATA PROCESSING  
 F1 Acquisition 0.971 sec  
 F2 Acquisition 0.971 sec  
 Total time 0 min, 23 sec

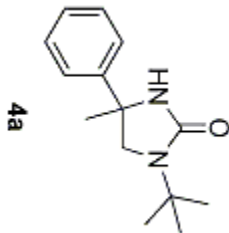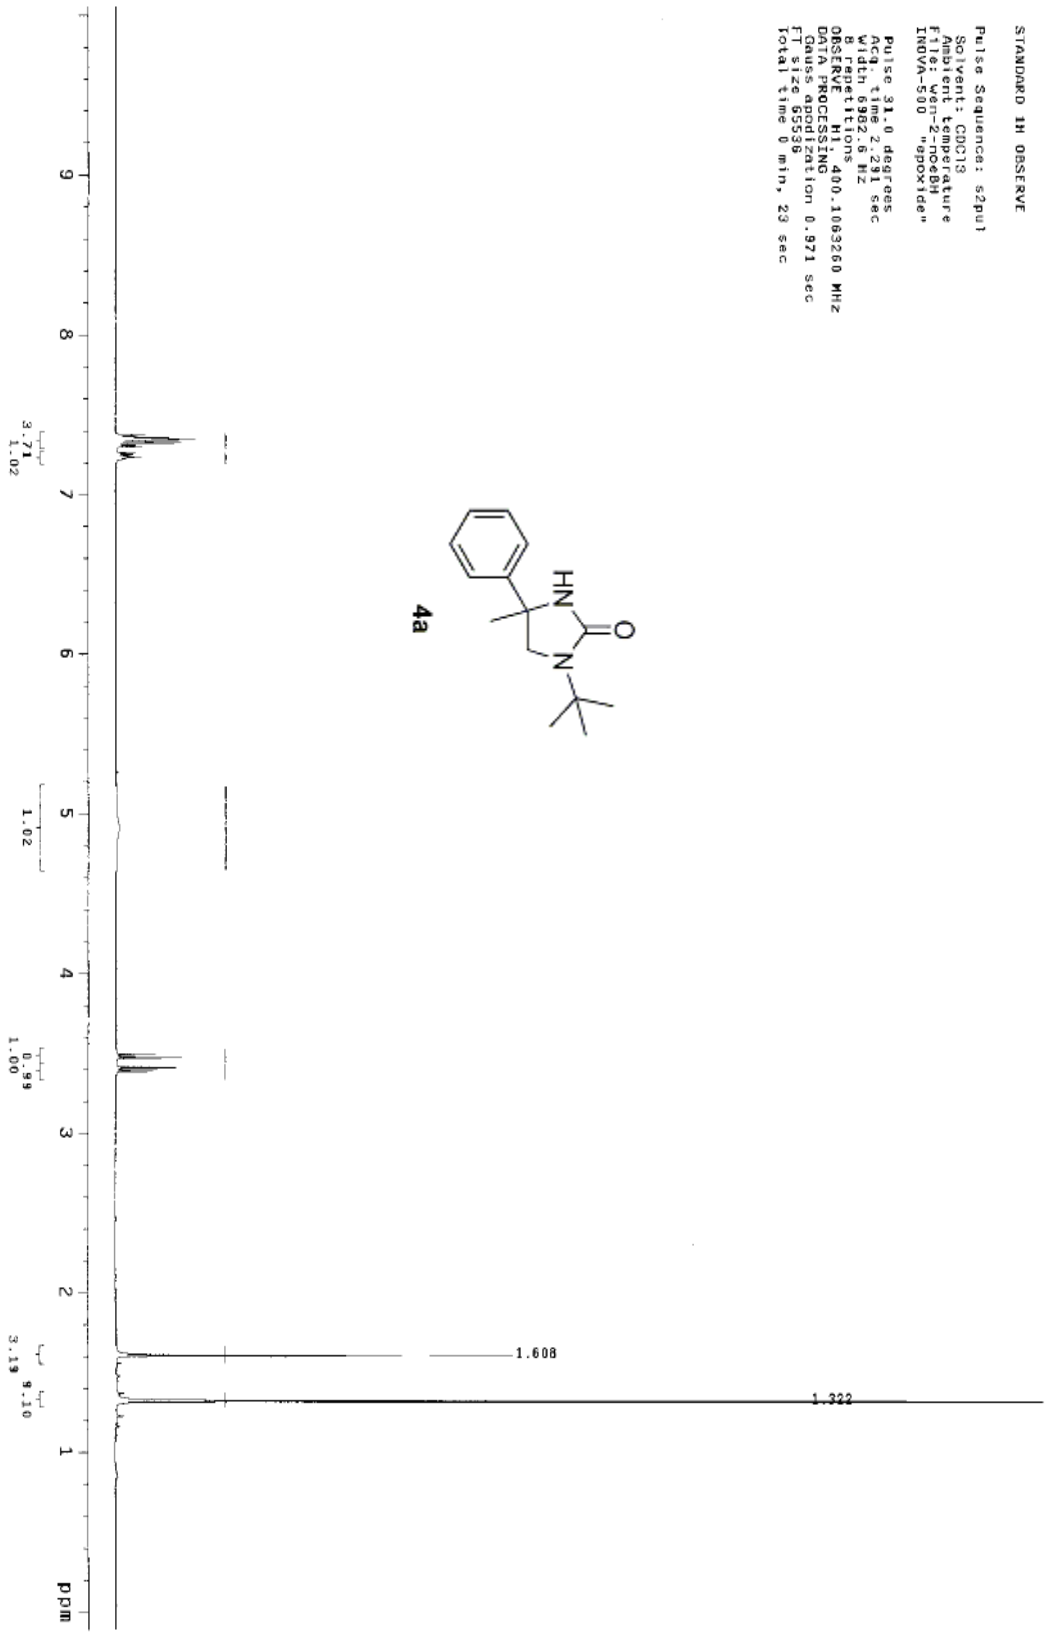

13C OBSERVE

Pulse Sequence: s2put

Solvent: CDCl3  
Substance: 4a  
File: chem-290A1C  
INOVA-500 "epoxide"

Relax. delay 1.700 sec  
Pulse 47.5 degrees  
Acq. time 0.539 sec  
Width 30018.8 Hz  
88 repetitions  
OBSERVE C13: 100.608067 MHz  
PULSE P1: 480.1083268 MHz  
Power 42 dB  
continuously on  
WALTZ-16 modulated  
DATA PROCESSING  
Line broadening 2.0 Hz  
FI size 32788  
Total time 29 min, 53 sec

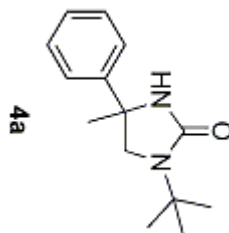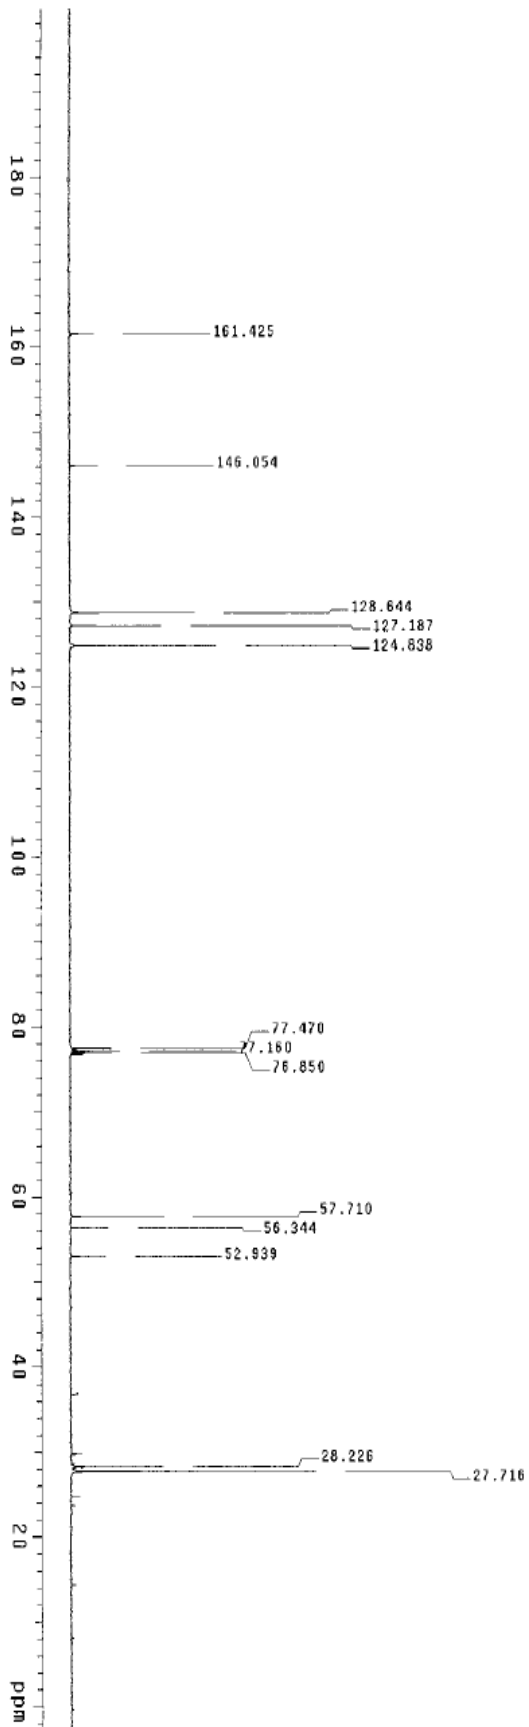

STANDARD 1H OBSERVE

Pulse Sequence: szpul

Solvent: DMSO

Acquisition Temperature

INOVA-500

Pulse 31.0 degrees

Acq. time 2.281 sec

Width 6982.6 Hz

8 Repetitions

Observed Resolution 0.001082024 MHz

Observed F2 500.136195 MHz

Gauss Modulation 0.971 sec

FI Size 65536

Total time 0 min, 23 sec

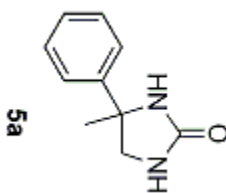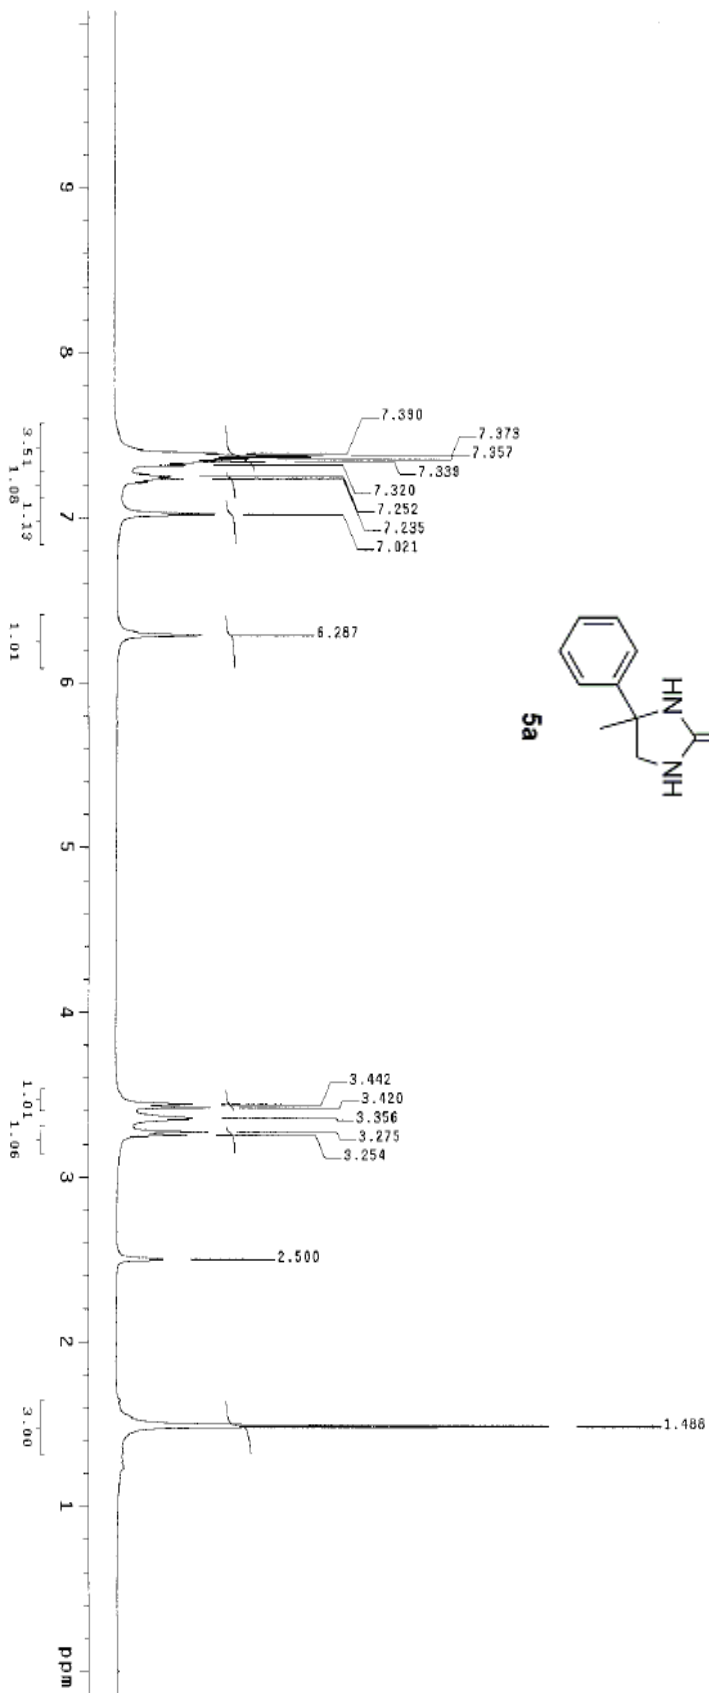



13C OBSERVE

Pulse Sequence: zgpg30  
Solvent: DMSO  
Ambient Temperature  
File: varm-2-00830  
INOVA-500 "epoxide"

Relax. delay 1.700 sec  
Pulse 14.000 deg  
Acq. time 0.453 sec  
Width 30013.8 Hz  
240 Repetitions  
OBSERVE C13, 100.6073320 MHz  
DECOUPLE H1, 400.1102274 MHz  
Power 42 dB  
CONTINUOUSLY  
WATERGATED  
DATA PROCESSING  
Line broadening 2.0 Hz  
FT size 32768  
Total time 59 min, 46 sec

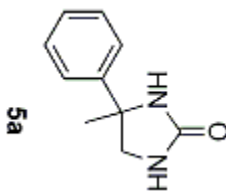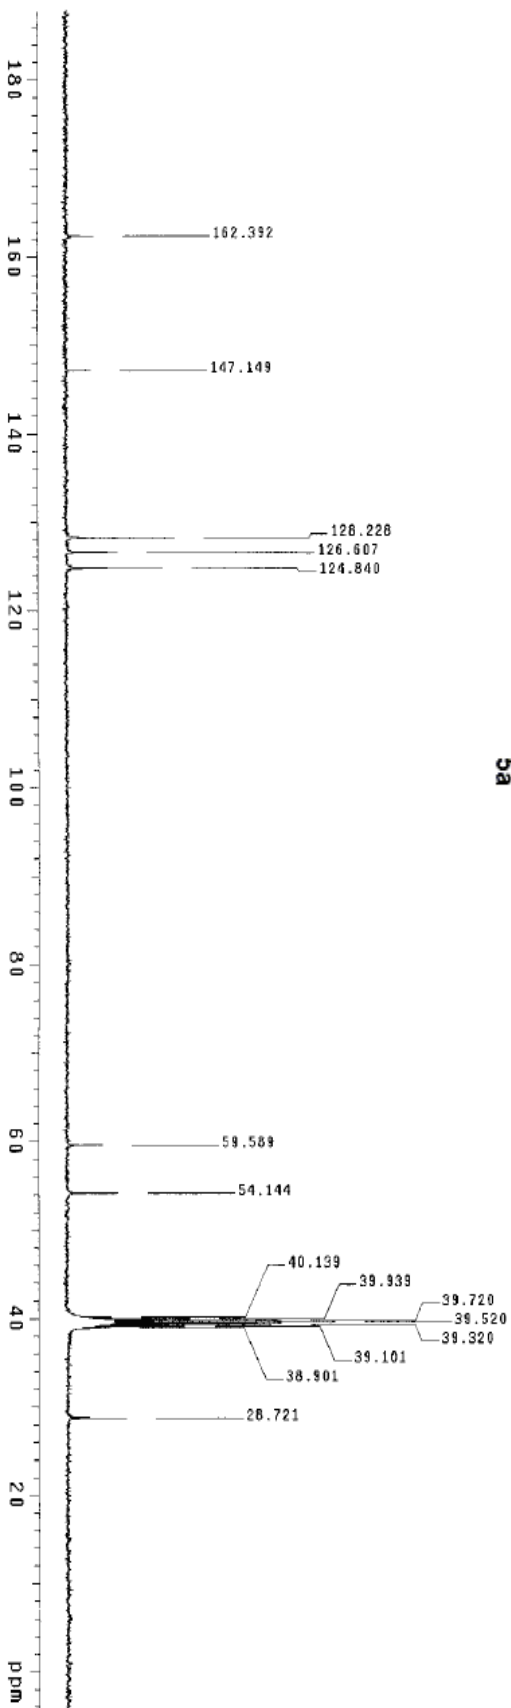

STANDARD 1H OBSERVE

Pulse Sequence: s2pu1

Solvent: CDCl3

Amplifier: Temperature

INOVA-500 "epoxide"

Relax. delay: 1.000 sec

Pulse: 34.0 degrees

Acq. time: 2.732 sec

Width: 6000.6 Hz

OS: 299.9533661 MHz

DATA PROCESSING

Gauss apodization: 0.824 sec

FI size: 65536

Total time: 0 min, 37 sec

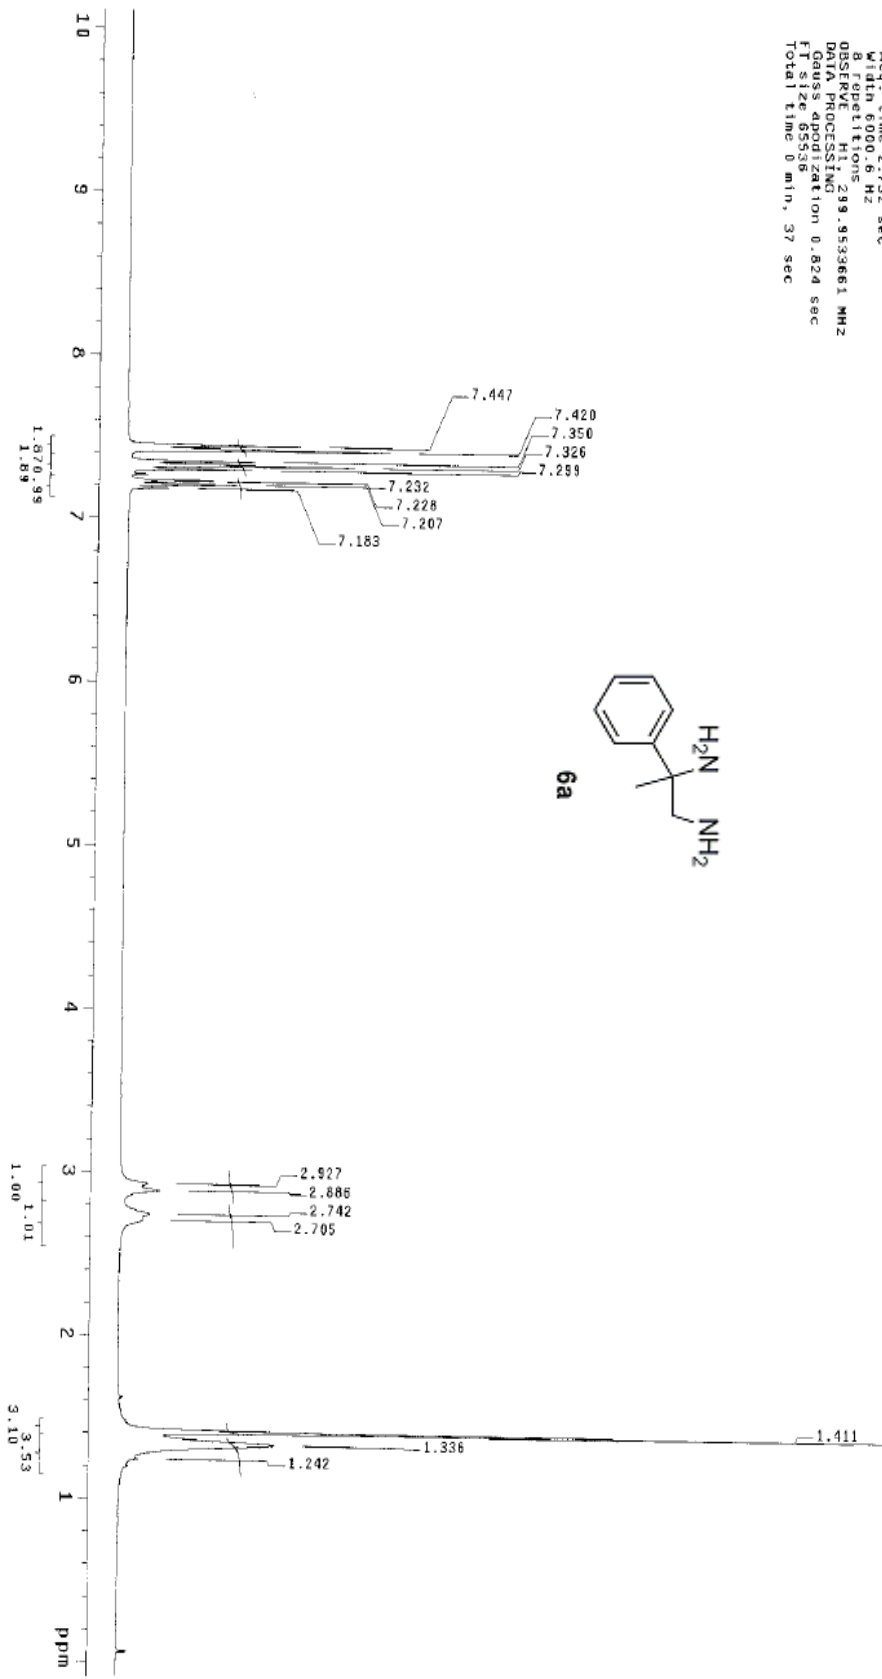

13C OBSERVE

Pulse Sequence: s2pul  
Solvent: CDCl3  
Acq. temperature  
File: Men-2-42BC  
INOVA-500 "epoxide"

Relax. delay 1.500 sec  
Pulse 39.1 degrees  
Acq. time 0.800 sec  
Width 20001.0 Hz  
NUC1 13C  
OBSERVE C13 101.254233348 MHz  
DECUPLE H1 293.5546859 MHz  
Power 35 dB  
continuously on  
WALTZ-16 modulated  
DATA ACQUISITION 1.0 Hz  
F1 size 32768  
Total time 30 min, 47 sec

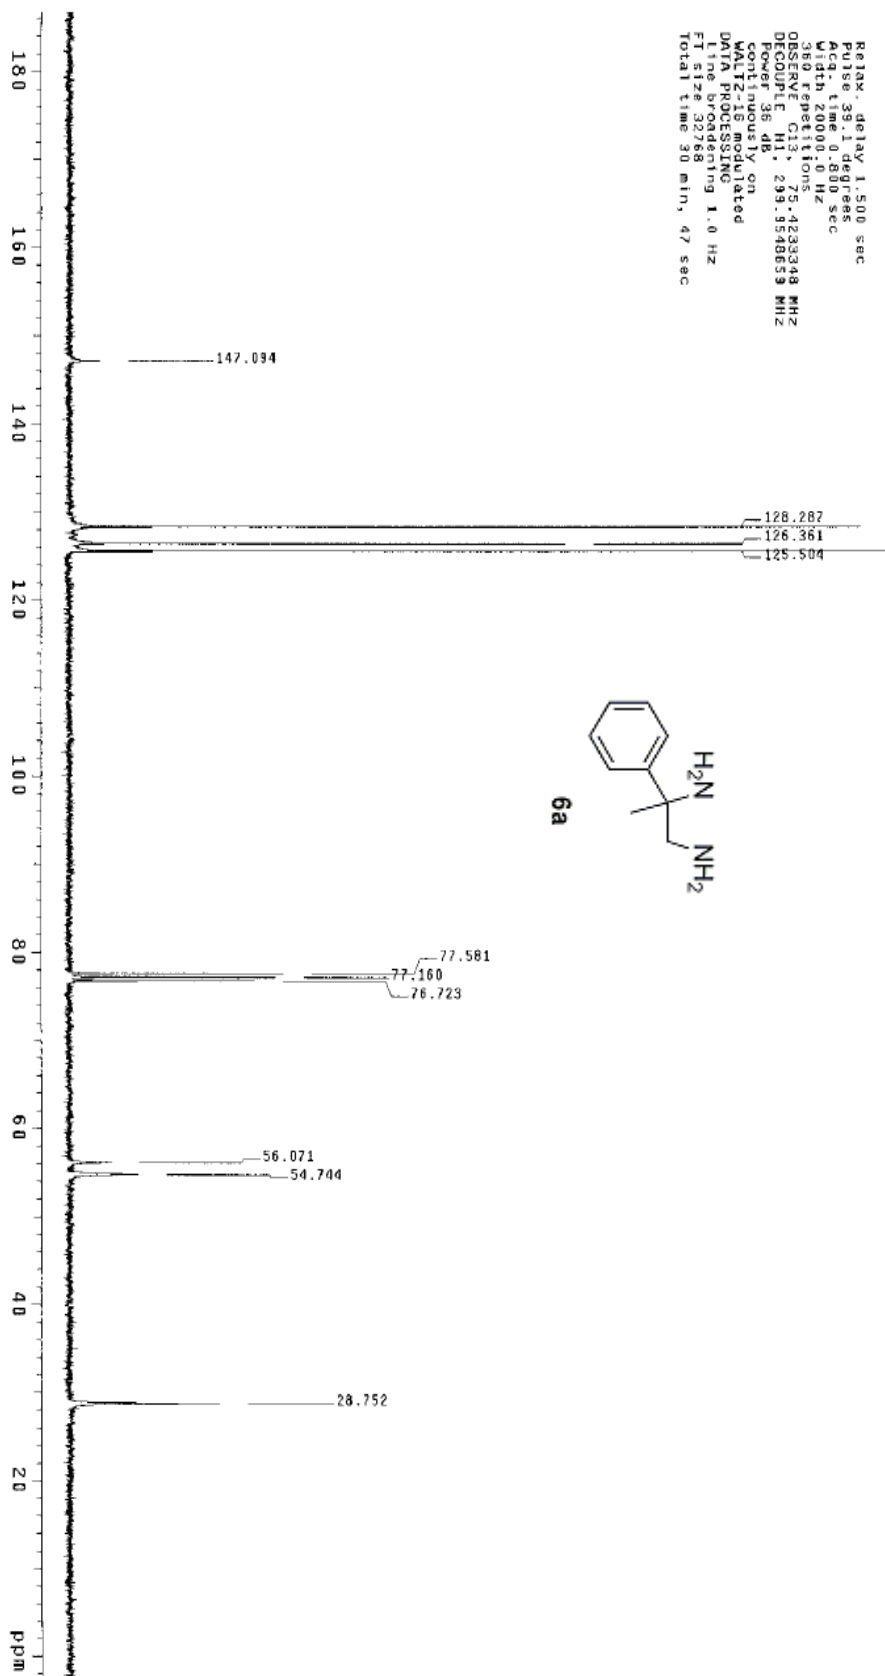

STANDARD 1H OBSERVE

Pulse Sequence: s2pul  
Solvent: CDCl3  
Ambient temperature  
File: WCH-3-05AH  
INDM-500 "epoxide"  
Pulse 31.0 degrees  
Acq time 2.59 sec  
Width 6982.6 Hz  
8 Repetitions  
OBSERVE H1, 400.1063397 MHz  
DATA PROCESSING  
Phase optimization 0.971 sec  
Total time 0 min, 23 sec

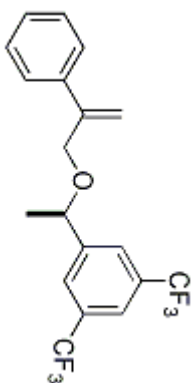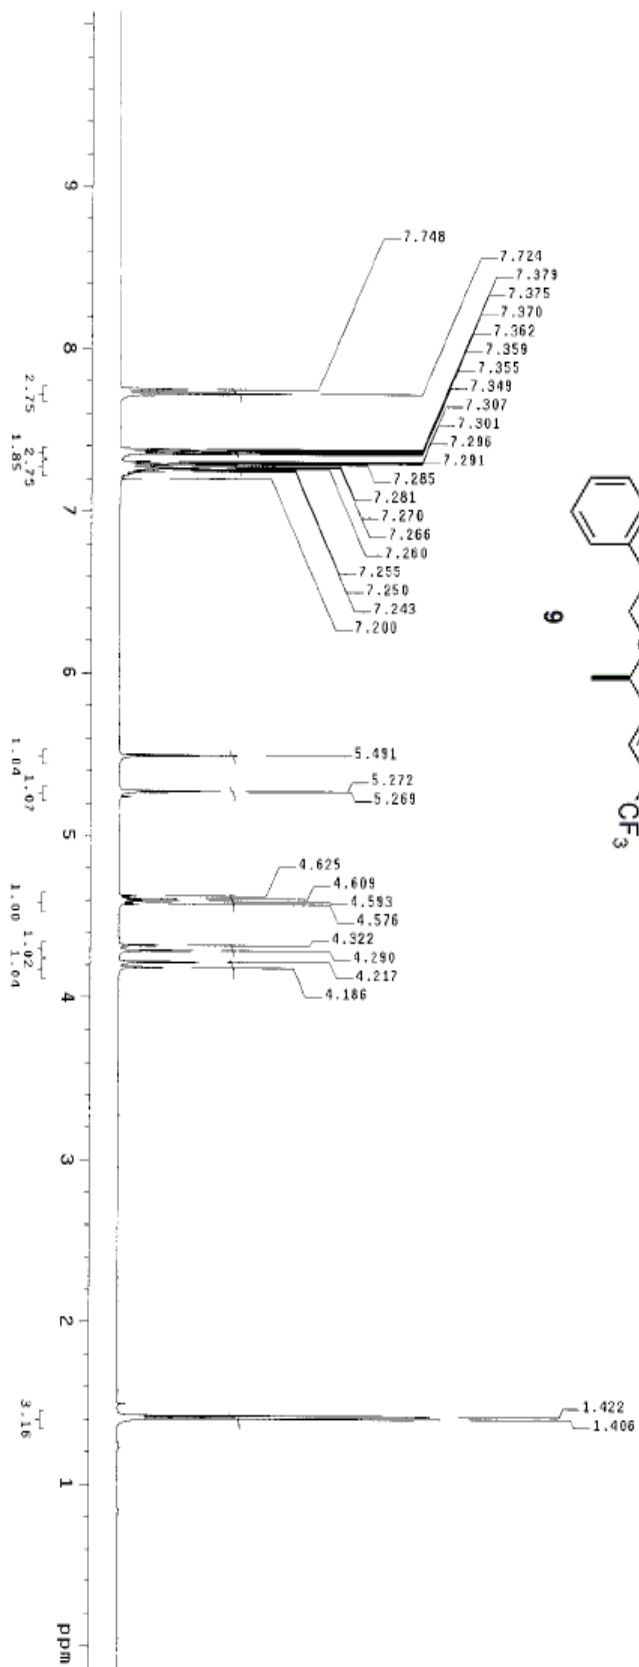

13C NMR

Pulse Sequence: zgpg30  
Solvent: CDCl3  
Ambient Temperature  
File: Ven-3-05AC  
INOVA-500 "epoxide"

Relax. delay 1.700 sec  
Pulse 44.5 degrees  
Acq. time 0.533 sec  
Width 30018.8 Hz  
200 repetitions  
ORIGIN C13: 400.6067975 MHz  
DECUPLE C13: 400.1083258 MHz  
Power 42 dB  
continuously on  
MALTZ-16 modulated  
DATA PROCESSING  
Line broadening 2.0 Hz  
FT size 32768  
Total time 29 min, 53 sec

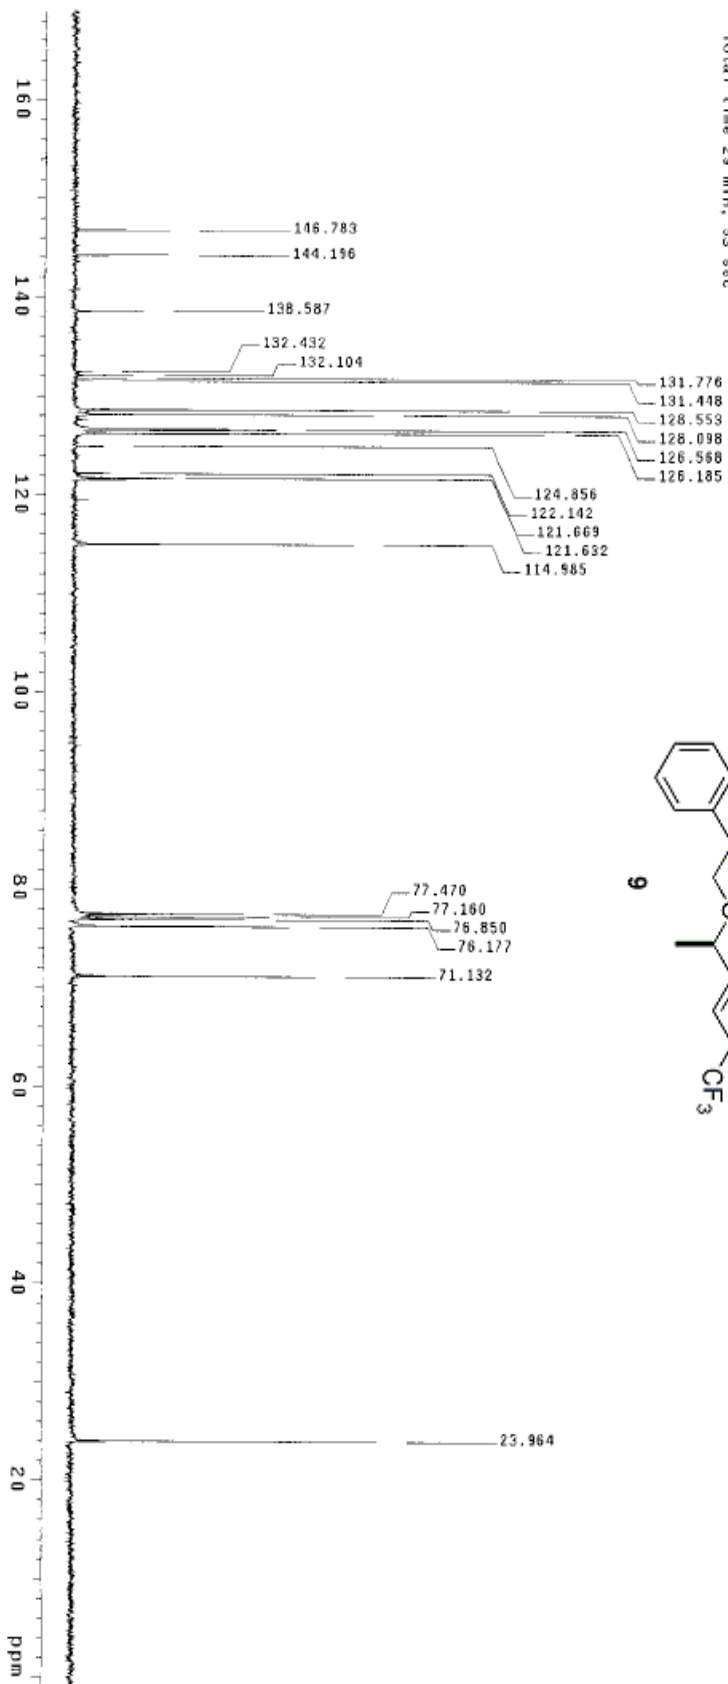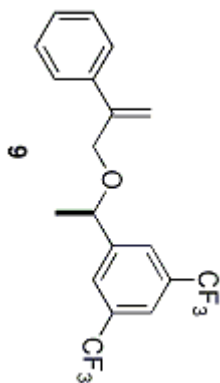

STANDARD 1H OBSERVE

Pulse Sequence: sput  
Solvent: CDCl3  
Ambient temperature  
File: var-3-24AHP  
INOVA-500 "epoxide"

Relax. delay 1.000 sec  
Pulse 34.049 sec  
Pulse program 2.75 sec  
Width 6000.6 Hz  
8 repetitions  
OBSERVE H1, 299.9533661 MHz  
DATA PROCESSING  
Gauss position 0.824 sec  
size 6536  
Total time 9 min, 37 sec

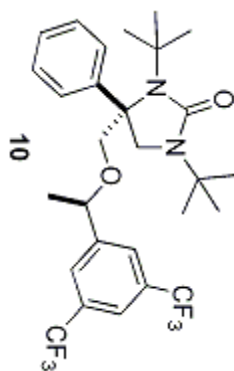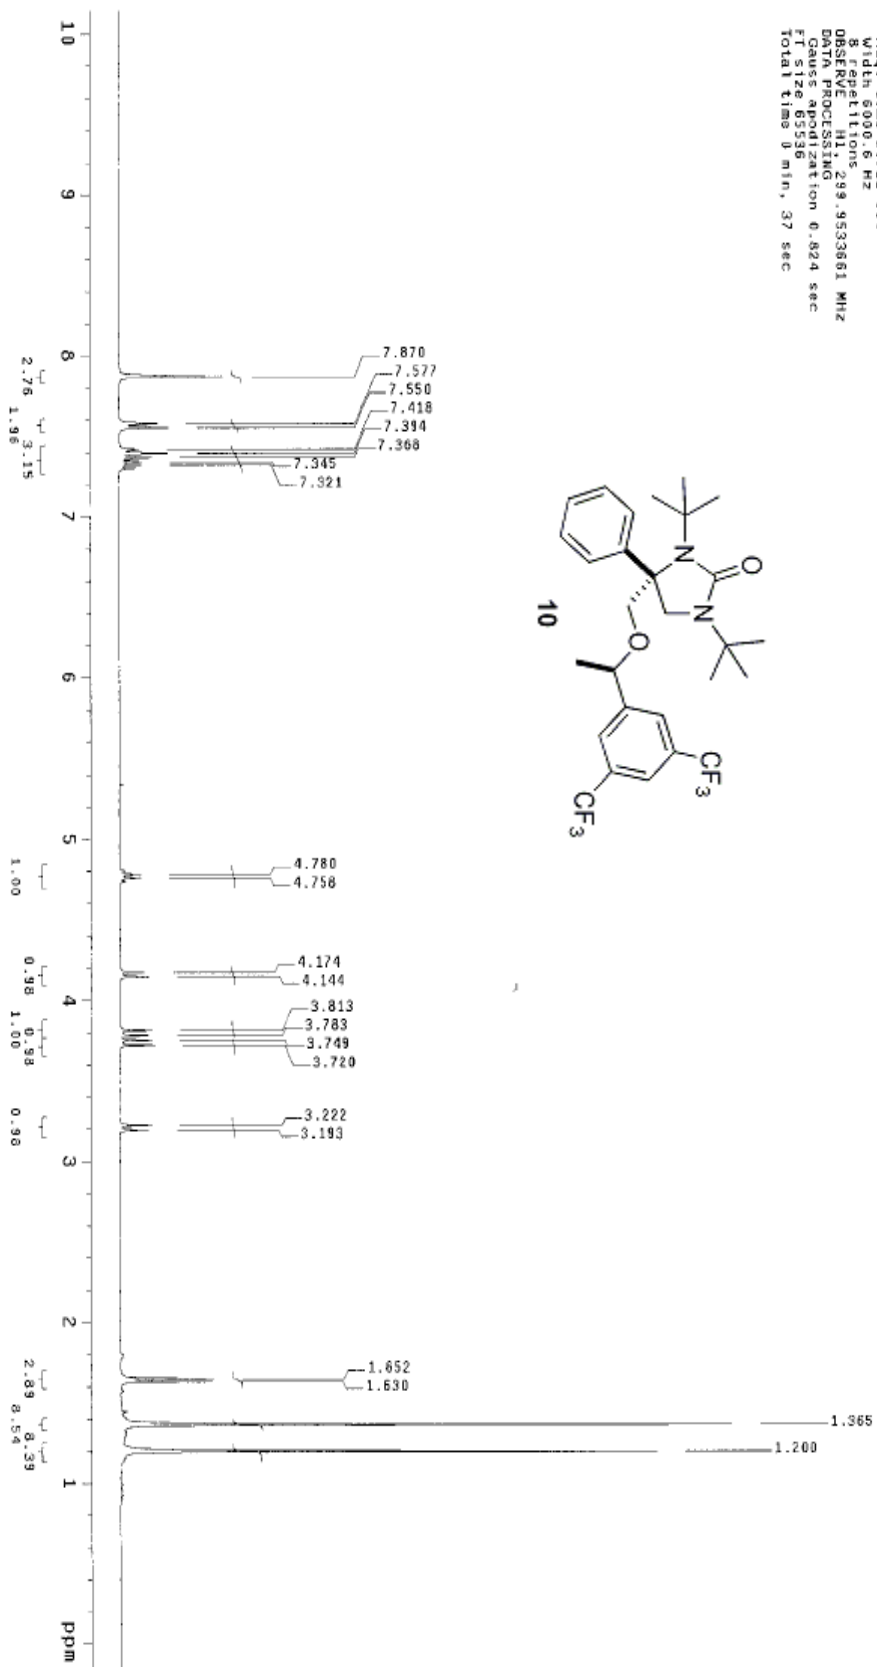

13C OBSERVE

Pulse Sequence: s2pul  
Solvent: CDCl3  
Ambient Temperature  
F1 INVD=50  
INDM=500

Relax. delay: 1.500 sec  
Pulse 39, 1 degrees  
Acq. time: 0.800 sec  
RG: 20000.0 Hz  
RG: 20000.0 Hz  
OBSERVE C13, 75.4233178 MHz  
DECUPLE H1, 299.9508659 MHz  
Power: 36 db  
VOLTAGE: on  
WALTZ16  
DATA PROCESSING  
Line broadening: 1.0 Hz  
FT size: 32768  
Total time: 5 min, 50 sec

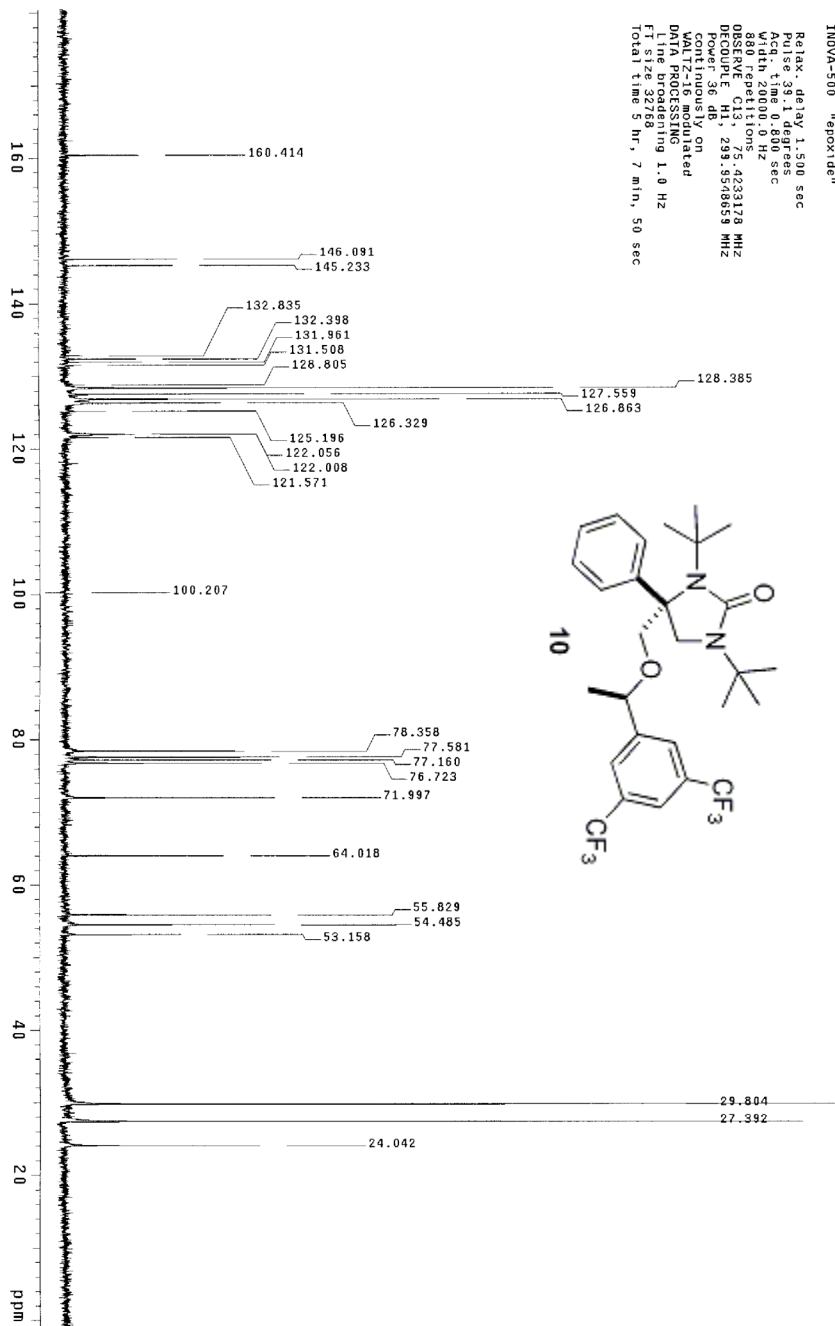

STANDARD 1H OBSERVE

Pulse Sequence: szpu1  
Solvent: CDCl3  
Ambient Temperature  
File: ven-3-2dbp  
INOVA-500 "epoxide"

Relax. delay 1.000 sec  
Pulse 34.0 degrees  
Acq. time 2.732 sec  
Width 6000.6 Hz  
Observed 1H  
Observed 1Hs 249.9533661 MHz  
DATA PROCESSING  
Gauss apodization 0.824 sec  
FT size 65536  
Total time 0 min, 37 sec

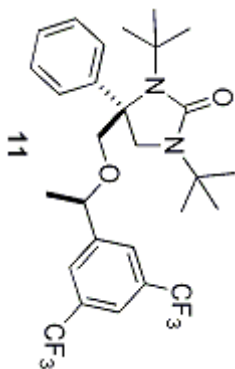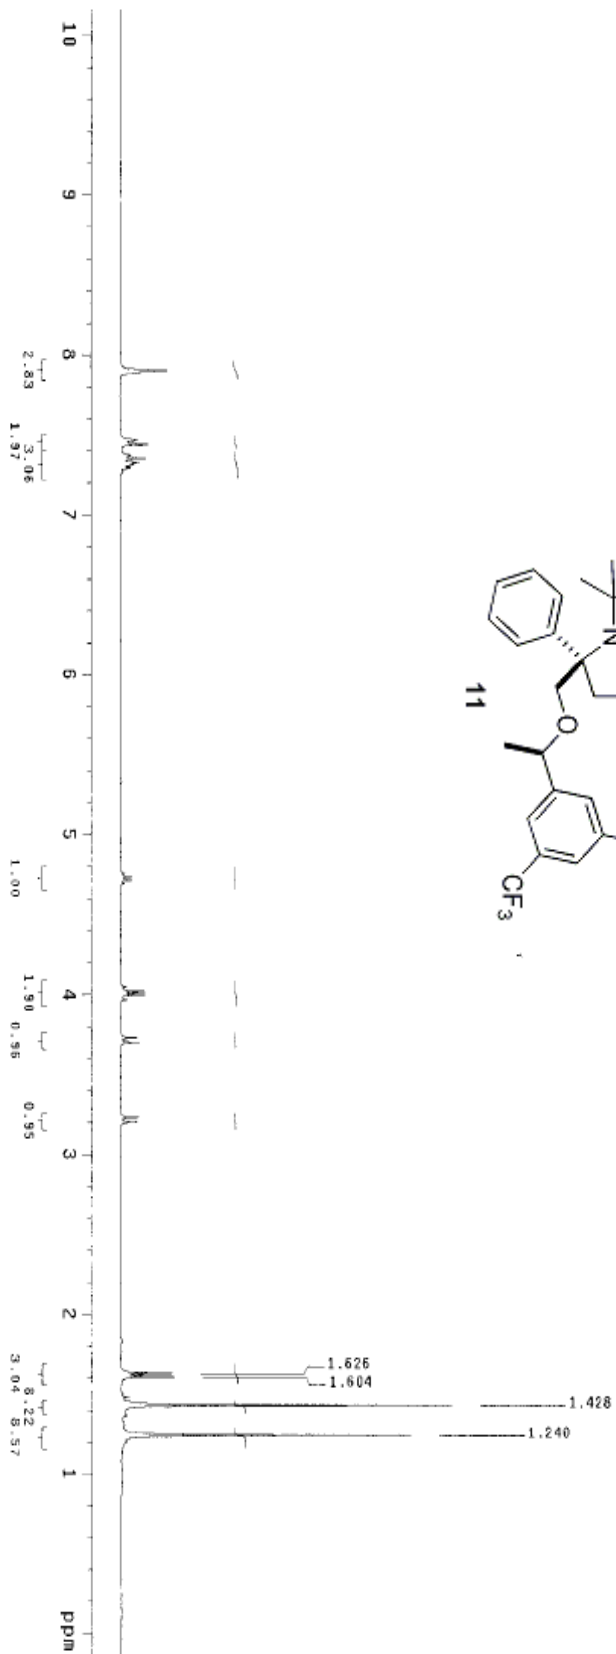



13C OBSERVE

Pulse Sequence: s2pul  
Solvent: CDCl3  
Ambient Temperature  
File: ven-3-24RCP  
INDVA-508 "epoxide"

Relax: delay 1.500 sec  
Pulse: 99.1 degrees  
Acq: 129.000 sec  
Vd: 1.000  
Z2: FIDET110NS  
OBSERVE: C13, 75.4233178 MHz  
DECOUPLE: H1, 299.9548559 MHz  
Power: 36 dB  
Continuously on  
WALTZ-16 modulated  
DATA PROCESSING  
F1 size 32768  
Total time 6 hr, 24 min, 48 sec

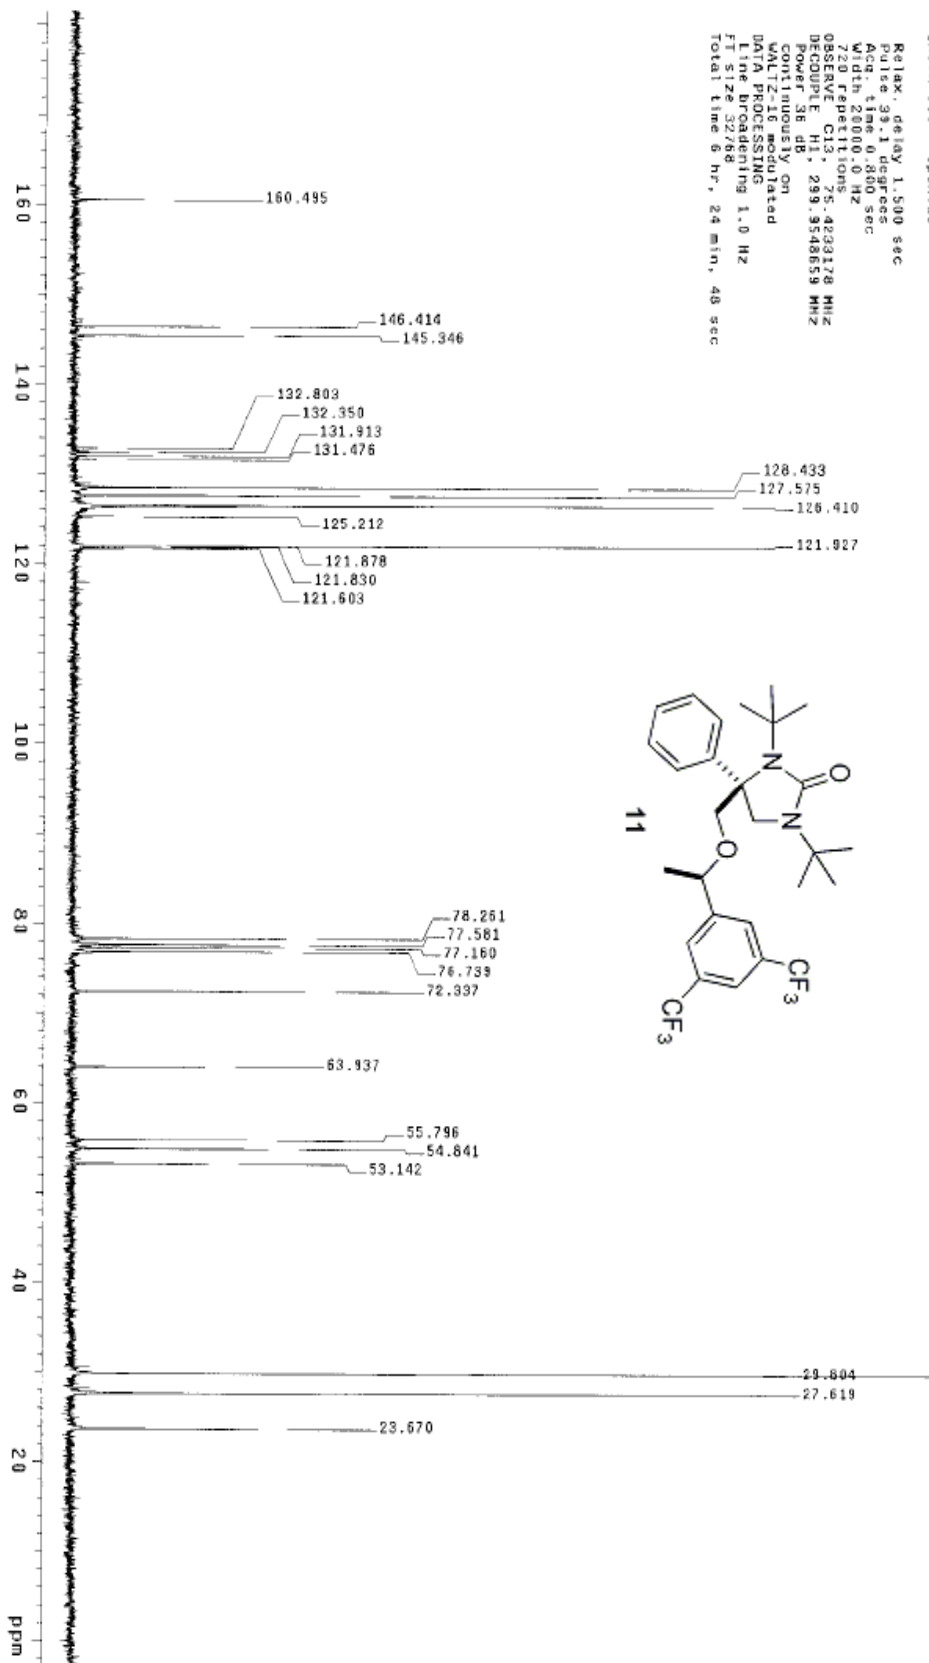

STANDARD 1H OBSERVE

Pulse Sequence: szpu1  
Solvent: CDCl3  
Acq. time: 2.732 sec  
File: Men-3-10APHR  
INOVA-500 "epoxide"

Relax. delay: 1.000 sec  
Pulse: 34.0 degrees  
Acq. time: 2.732 sec  
Width: 8000.6 Hz  
Observed: 299.9533661 MHz  
DATA PROCESSING  
Gauss apodization: 0.824 sec  
FI size: 65536  
Total time: 0 min, 37 sec

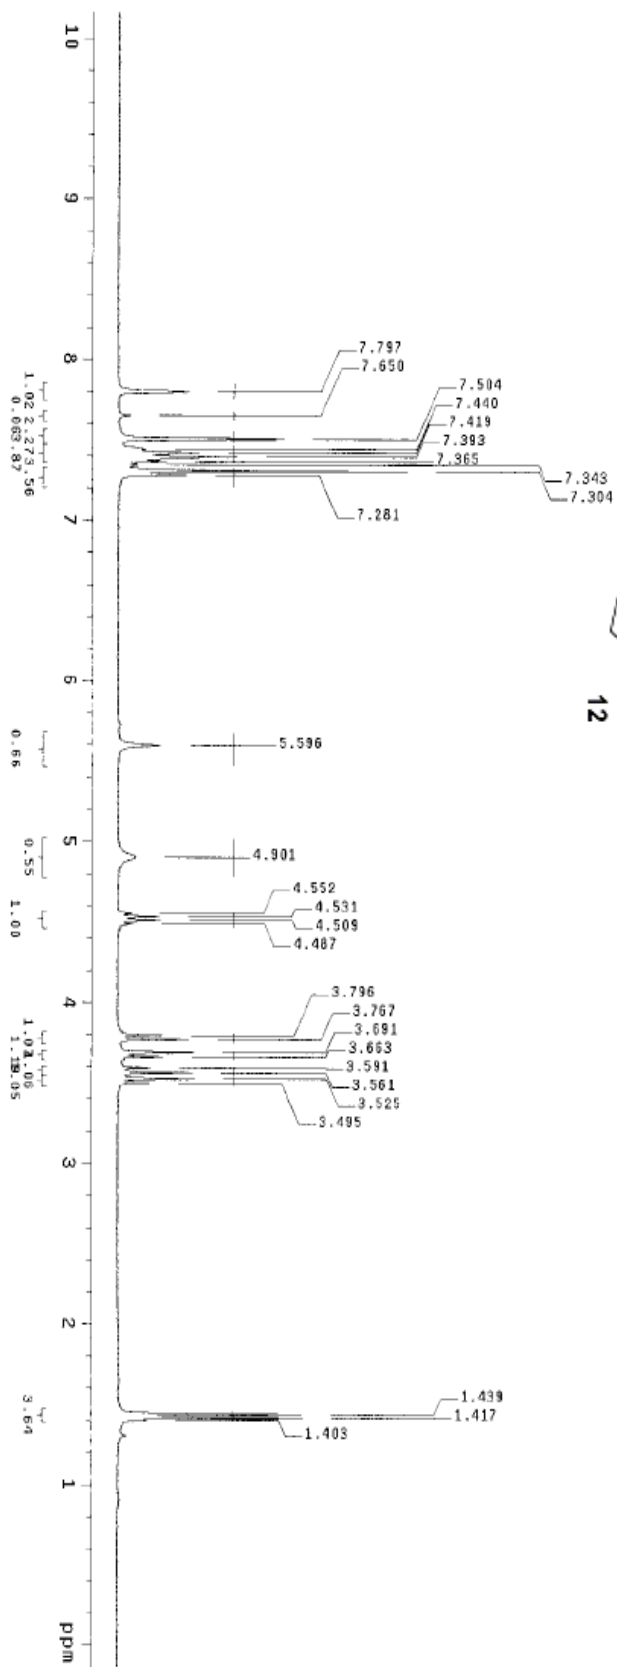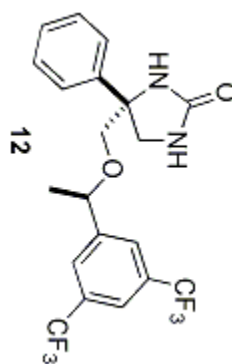

13C NMR

Pulse Sequence: s2put  
Solvent: CDCl3  
Ambient temperature  
File: men-3-10MOC  
IMOVA-500 \*epoxide

Relax. delay 1.500 sec  
Pulse 39.1 degrees  
Acq. time 0.800 sec  
Scan 2000  
5280 2000.0 Hz  
OBSERVE C13 1075  
DECUPLE H1 299.950659 MHz  
Power 96 dB  
continuously on  
WALTZ-16 modulated  
DATA PROCESSING  
Line broadening 1.0 Hz  
File size 32768  
Total time 84 hr, 8 min, 3 sec

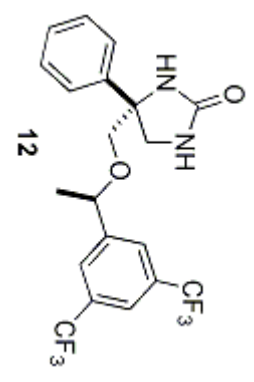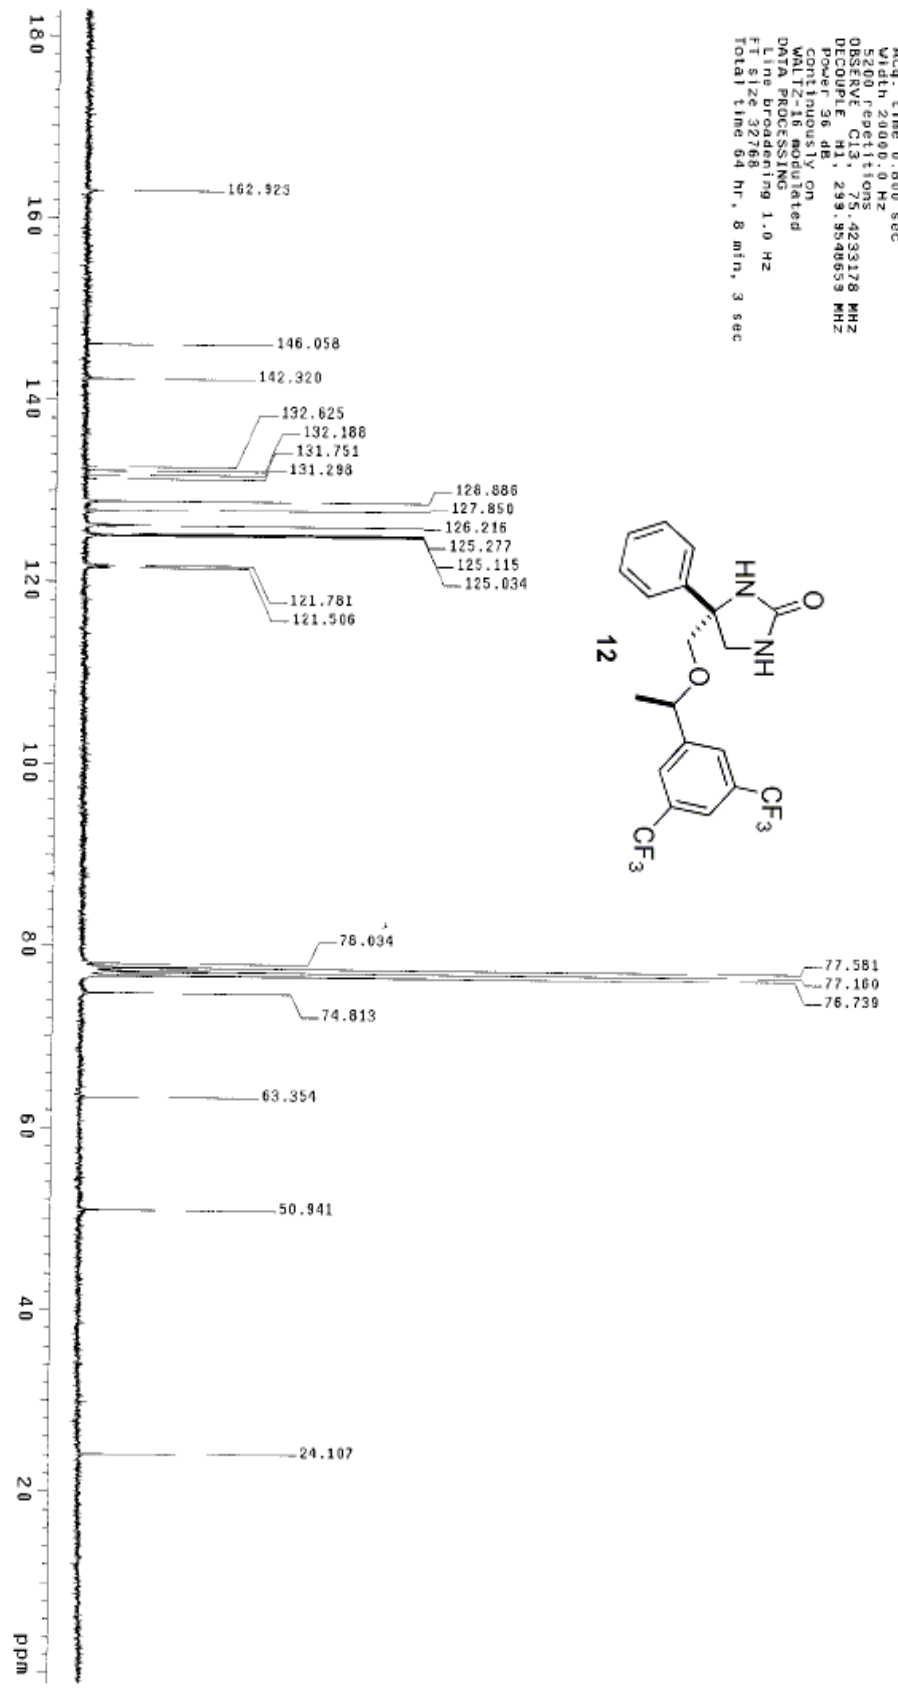

STANDARD 1H OBSERVE

Pulse Sequence: s2pu1  
Solvent: CDCl3  
Ambient temperature  
File: W01-3-22AHP2  
INDVA-500 "epoxide"

Relax. delay 0.000 sec  
Pulse 26.0 degrees  
Acq. 1.595299 sec  
Fid 1.595299 sec  
32 repetitions  
OBSERVE H1, 300.1592196 MHz  
DATA PROCESSING  
Gauss apodization 0.898 sec  
F1 size 32766  
Total time 1 min, 31 sec

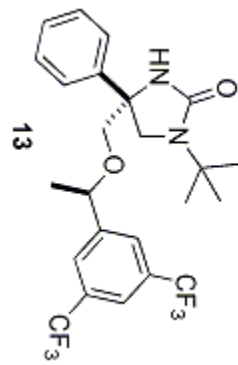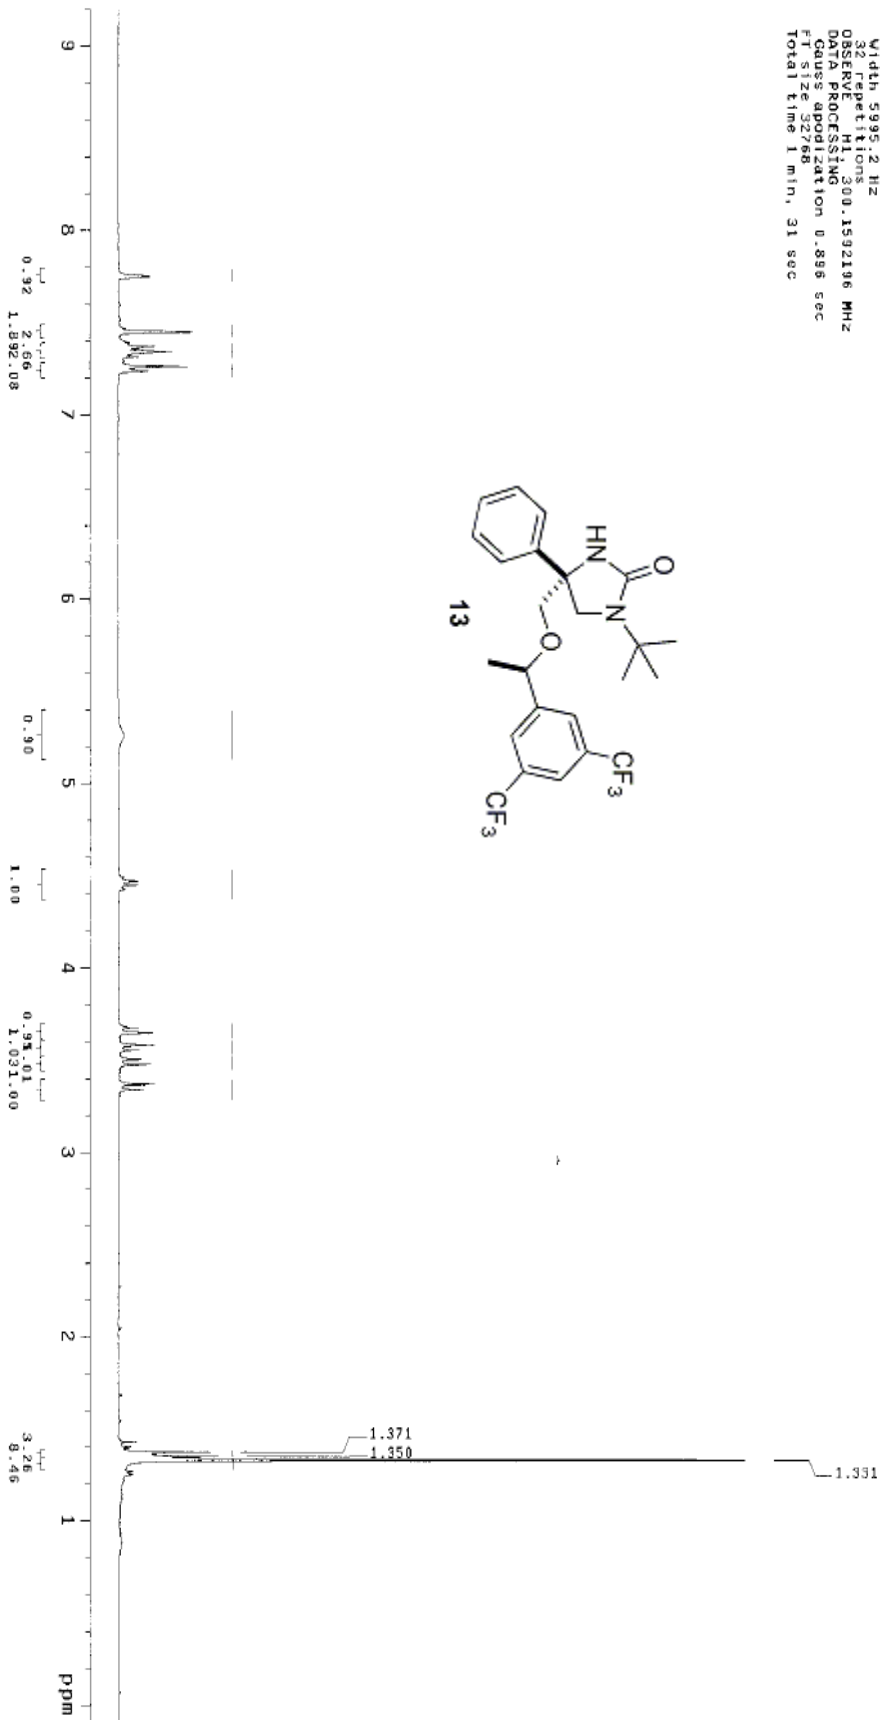

13C OBSERVE

Pulse Sequence: s2pul1  
Solvent: CDCl3  
Ambient Temperature  
File: ven-3-22ACP  
INOVA-500 "epoxide"

Relax. delay 1.500 sec  
Pulse 39.1 degrees  
Acq. time 0.800 sec  
1584 F2 (0.001) F0 F2  
OBSERVE CDCl3 75.4233176 MHz  
DECOUPLE H1 299.5543659 MHz  
Power 36 dB  
continously on  
WALTZ-16 modulated  
DATA ACQUISITION  
Pulse program 1.0 Hz  
F1 size 32768  
Total time 6 hr, 24 min, 48 sec

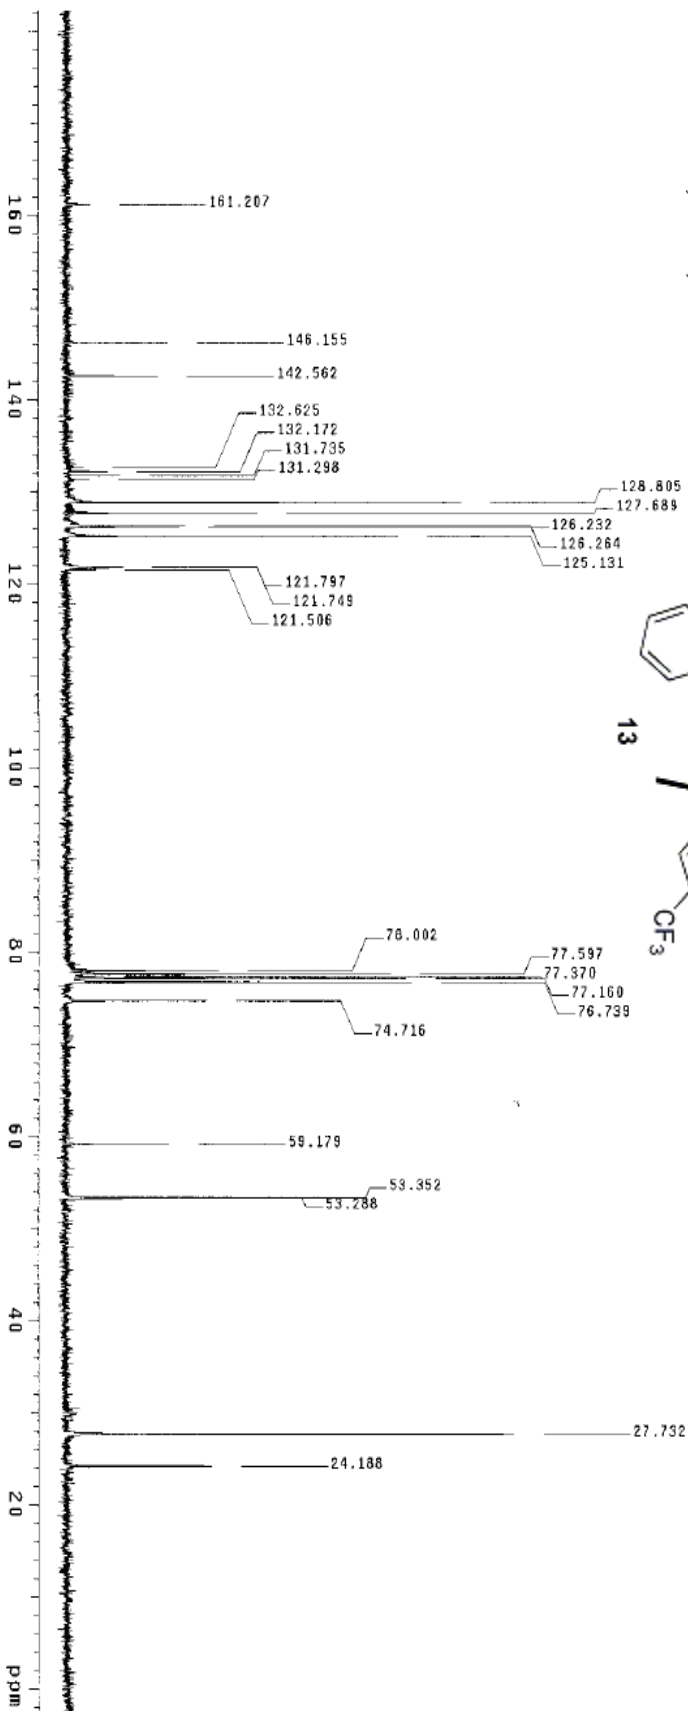

STANDARD 1H OBSERVE

Pulse Sequence: szpu1  
Solvent: CDCl3  
Acq. time: 4.00 min  
File: wfn-4-b7a  
INOVA-500 "epoxide"

Pulse: 31.0 degrees  
Acq. time: 2.291 sec  
Width: 6982.6 Hz  
8 repetitions  
OBSERVE: H1, 400.1063260 MHz  
DATA ACQUISITION: 0.971 sec  
FT size: 65536  
Total time: 0 min, 23 sec

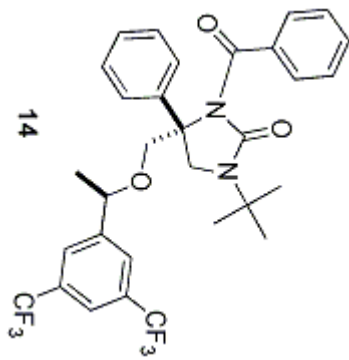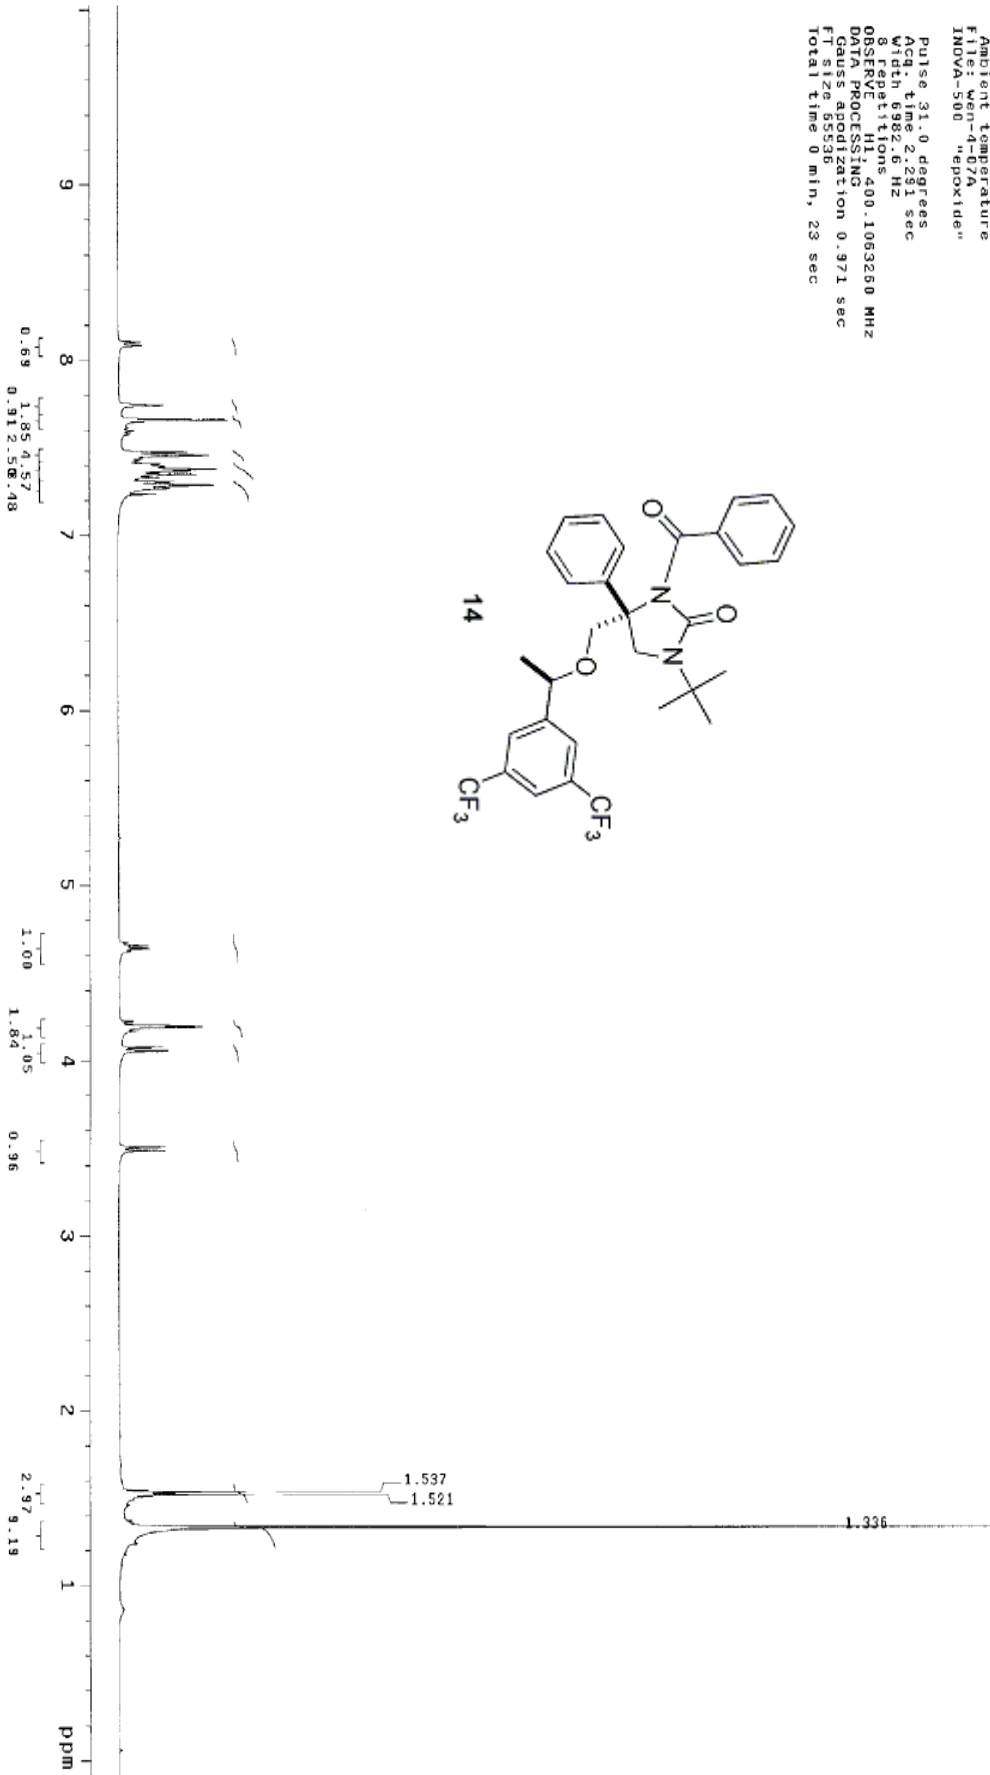

13C OBSERVE

Pulse Sequence: s2pu1  
Solvent: CDCl3  
Acq. temperature  
File: wen-4-07AC4  
INQVA-500 "epoxide"

Relax. delay 1.700 sec  
Pulse 44.5 degrees  
Acq. time 0.533 sec  
Width 30018.8 Hz  
364 repetitions  
OBSERVE C13, 100.6082993 MHz  
PULPROG zgpg30  
Power 42 dB  
continuously on  
WALTZ-16 modulated  
DATA PROCESSING  
Line broadening 2.0 Hz  
FT size 32768  
Total time 29 min, 53 sec

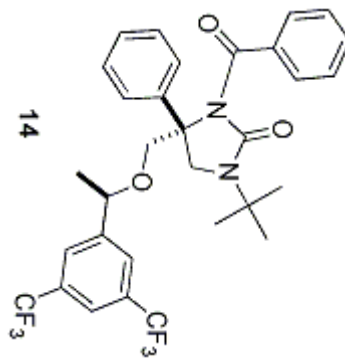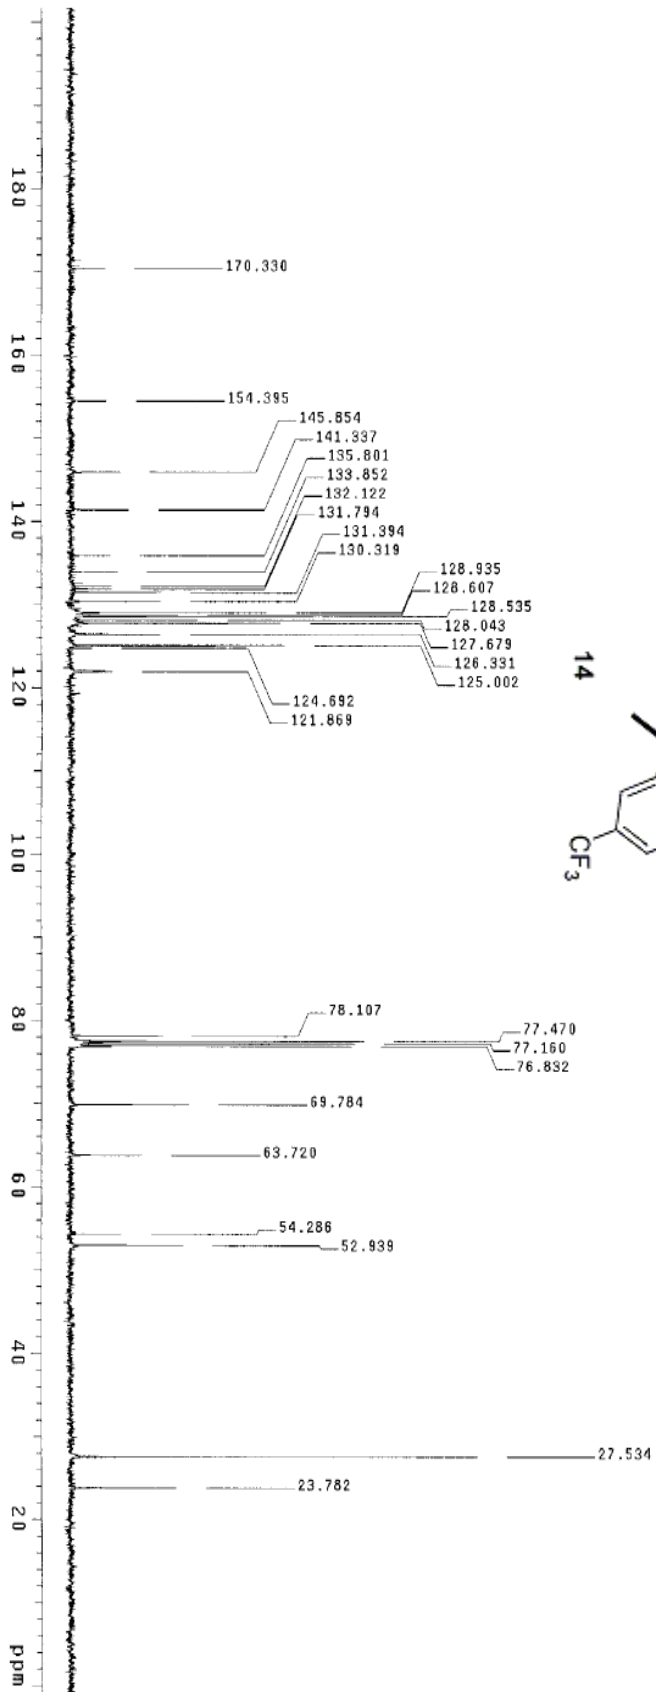

The X-ray structure of compound **14**

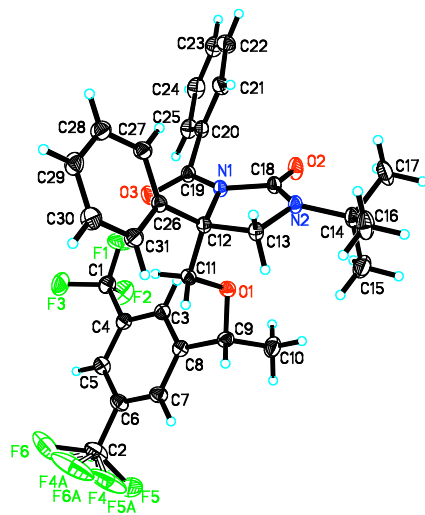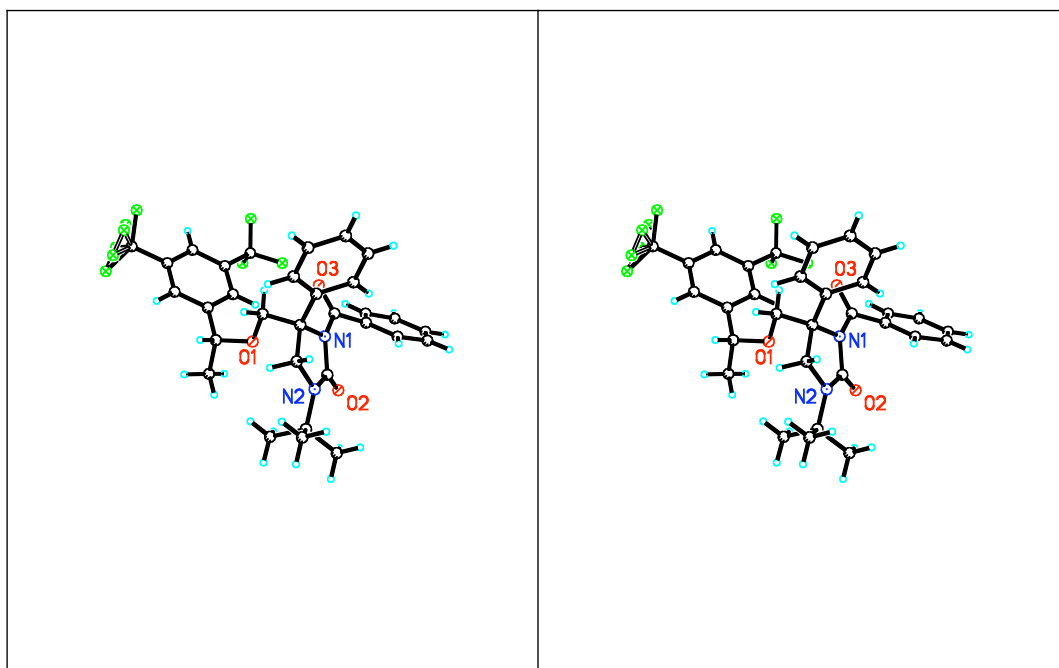



Table 1. Crystal data and structure refinement for 14.

|                                   |                                             |                  |
|-----------------------------------|---------------------------------------------|------------------|
| Identification code               | ys190_0m                                    |                  |
| Empirical formula                 | C31 H30 F6 N2 O3                            |                  |
| Formula weight                    | 592.57                                      |                  |
| Temperature                       | 120(2) K                                    |                  |
| Wavelength                        | 0.71073 Å                                   |                  |
| Crystal system                    | Monoclinic                                  |                  |
| Space group                       | P2(1)                                       |                  |
| Unit cell dimensions              | a = 9.5388(6) Å                             | ∠ = 90°.         |
|                                   | b = 14.5600(10) Å                           | ∠ = 109.057(4)°. |
|                                   | c = 10.9484(7) Å                            | ∠ = 90°.         |
| Volume                            | 1437.23(16) Å <sup>3</sup>                  |                  |
| Z                                 | 2                                           |                  |
| Density (calculated)              | 1.369 Mg/m <sup>3</sup>                     |                  |
| Absorption coefficient            | 0.114 mm <sup>-1</sup>                      |                  |
| F(000)                            | 616                                         |                  |
| Crystal size                      | 0.52 x 0.34 x 0.24 mm <sup>3</sup>          |                  |
| Theta range for data collection   | 2.26 to 45.37°.                             |                  |
| Index ranges                      | -19 ≤ h ≤ 18, -22 ≤ k ≤ 28, -21 ≤ l ≤ 21    |                  |
| Reflections collected             | 40750                                       |                  |
| Independent reflections           | 18762 [R(int) = 0.0555]                     |                  |
| Completeness to theta = 45.37°    | 98.7 %                                      |                  |
| Absorption correction             | Multi-scan                                  |                  |
| Max. and min. transmission        | 0.9728 and 0.9433                           |                  |
| Refinement method                 | Full-matrix least-squares on F <sup>2</sup> |                  |
| Data / restraints / parameters    | 18762 / 1 / 408                             |                  |
| Goodness-of-fit on F <sup>2</sup> | 0.967                                       |                  |
| Final R indices [I > 2σ(I)]       | R1 = 0.0562, wR2 = 0.1185                   |                  |
| R indices (all data)              | R1 = 0.1293, wR2 = 0.1478                   |                  |
| Absolute structure parameter      | -0.1(4)                                     |                  |
| Extinction coefficient            | 0.0167(18)                                  |                  |
| Largest diff. peak and hole       | 0.382 and -0.337 e.Å <sup>-3</sup>          |                  |

Table 2. Atomic coordinates ( $\times 10^4$ ) and equivalent isotropic displacement parameters ( $\text{\AA}^2 \times 10^3$ )

for ys190\_0m.  $U(\text{eq})$  is defined as one third of the trace of the orthogonalized  $U_{ij}$  tensor.

|       | x        | y        | z        | $U(\text{eq})$ |
|-------|----------|----------|----------|----------------|
| N(1)  | 6812(1)  | 7867(1)  | 10838(1) | 16(1)          |
| N(2)  | 4784(1)  | 7863(1)  | 11440(1) | 18(1)          |
| O(1)  | 4867(1)  | 8660(1)  | 8719(1)  | 19(1)          |
| O(2)  | 5466(1)  | 6505(1)  | 10675(1) | 26(1)          |
| O(3)  | 8443(1)  | 8044(1)  | 9734(1)  | 24(1)          |
| F(1)  | 8541(1)  | 7593(1)  | 6800(1)  | 40(1)          |
| F(2)  | 7622(1)  | 7563(1)  | 4731(1)  | 41(1)          |
| F(3)  | 9255(1)  | 8567(1)  | 5656(1)  | 41(1)          |
| F(4)  | 4655(10) | 10724(3) | 2884(3)  | 101(2)         |
| F(4A) | 5660(6)  | 10935(3) | 3193(5)  | 66(2)          |
| F(5)  | 3541(3)  | 10963(4) | 3402(5)  | 83(2)          |
| F(5A) | 4215(7)  | 11504(3) | 4334(5)  | 78(2)          |
| F(6)  | 6357(4)  | 11405(3) | 4242(6)  | 98(2)          |
| F(6A) | 5309(7)  | 11713(2) | 4641(3)  | 81(2)          |
| C(1)  | 8063(2)  | 8123(1)  | 5756(1)  | 25(1)          |
| C(2)  | 5041(2)  | 10922(1) | 4063(2)  | 34(1)          |
| C(3)  | 6066(1)  | 8624(1)  | 6636(1)  | 20(1)          |
| C(4)  | 6870(1)  | 8779(1)  | 5799(1)  | 20(1)          |
| C(5)  | 6558(2)  | 9527(1)  | 4958(1)  | 22(1)          |
| C(6)  | 5406(2)  | 10111(1) | 4955(1)  | 22(1)          |
| C(7)  | 4589(2)  | 9961(1)  | 5784(1)  | 22(1)          |
| C(8)  | 4919(1)  | 9221(1)  | 6633(1)  | 19(1)          |
| C(9)  | 4006(1)  | 9058(1)  | 7525(1)  | 20(1)          |
| C(10) | 2749(2)  | 8385(1)  | 6919(1)  | 30(1)          |
| C(11) | 5952(1)  | 9276(1)  | 9515(1)  | 17(1)          |
| C(12) | 6485(1)  | 8854(1)  | 10874(1) | 16(1)          |
| C(13) | 5179(1)  | 8830(1)  | 11427(1) | 18(1)          |
| C(14) | 3290(1)  | 7604(1)  | 11489(1) | 21(1)          |
| C(15) | 2179(2)  | 7680(1)  | 10130(2) | 33(1)          |

|       |          |          |          |       |
|-------|----------|----------|----------|-------|
| C(16) | 2887(2)  | 8274(1)  | 12402(2) | 33(1) |
| C(17) | 3301(2)  | 6631(1)  | 12017(2) | 37(1) |
| C(18) | 5635(1)  | 7315(1)  | 10965(1) | 18(1) |
| C(19) | 7891(1)  | 7539(1)  | 10344(1) | 18(1) |
| C(20) | 8464(1)  | 6586(1)  | 10689(1) | 18(1) |
| C(21) | 8739(2)  | 6233(1)  | 11934(1) | 23(1) |
| C(22) | 9446(2)  | 5390(1)  | 12268(2) | 28(1) |
| C(23) | 9854(2)  | 4885(1)  | 11361(2) | 30(1) |
| C(24) | 9574(2)  | 5227(1)  | 10123(2) | 28(1) |
| C(25) | 8903(2)  | 6084(1)  | 9792(1)  | 24(1) |
| C(26) | 7784(1)  | 9406(1)  | 11754(1) | 17(1) |
| C(27) | 9056(2)  | 8985(1)  | 12589(1) | 22(1) |
| C(28) | 10194(2) | 9514(1)  | 13399(1) | 25(1) |
| C(29) | 10087(2) | 10461(1) | 13408(1) | 27(1) |
| C(30) | 8826(2)  | 10884(1) | 12595(2) | 29(1) |
| C(31) | 7686(2)  | 10363(1) | 11771(1) | 24(1) |

---

Table 3. Bond lengths [ $\text{\AA}$ ] and angles [ $^\circ$ ] for ys190\_0m.

---

|             |            |
|-------------|------------|
| N(1)-C(19)  | 1.3936(15) |
| N(1)-C(18)  | 1.4239(15) |
| N(1)-C(12)  | 1.4746(15) |
| N(2)-C(18)  | 1.3574(16) |
| N(2)-C(13)  | 1.4583(16) |
| N(2)-C(14)  | 1.4922(15) |
| O(1)-C(9)   | 1.4208(15) |
| O(1)-C(11)  | 1.4311(15) |
| O(2)-C(18)  | 1.2179(16) |
| O(3)-C(19)  | 1.2223(15) |
| F(1)-C(1)   | 1.3296(17) |
| F(2)-C(1)   | 1.3385(17) |
| F(3)-C(1)   | 1.3433(18) |
| F(4)-C(2)   | 1.254(4)   |
| F(4A)-C(2)  | 1.274(3)   |
| F(5)-C(2)   | 1.377(3)   |
| F(5A)-C(2)  | 1.256(3)   |
| F(6)-C(2)   | 1.396(4)   |
| F(6A)-C(2)  | 1.298(3)   |
| C(1)-C(4)   | 1.4982(18) |
| C(2)-C(6)   | 1.500(2)   |
| C(3)-C(4)   | 1.3923(17) |
| C(3)-C(8)   | 1.3965(18) |
| C(4)-C(5)   | 1.3941(19) |
| C(5)-C(6)   | 1.3880(19) |
| C(6)-C(7)   | 1.3936(18) |
| C(7)-C(8)   | 1.3904(19) |
| C(8)-C(9)   | 1.5234(17) |
| C(9)-C(10)  | 1.523(2)   |
| C(11)-C(12) | 1.5353(17) |
| C(12)-C(26) | 1.5260(17) |
| C(12)-C(13) | 1.5522(16) |
| C(14)-C(15) | 1.523(2)   |
| C(14)-C(17) | 1.528(2)   |
| C(14)-C(16) | 1.533(2)   |

|             |            |
|-------------|------------|
| C(19)-C(20) | 1.4942(17) |
| C(20)-C(25) | 1.3939(17) |
| C(20)-C(21) | 1.3989(18) |
| C(21)-C(22) | 1.3901(19) |
| C(22)-C(23) | 1.391(2)   |
| C(23)-C(24) | 1.386(2)   |
| C(24)-C(25) | 1.395(2)   |
| C(26)-C(31) | 1.3965(18) |
| C(26)-C(27) | 1.3997(18) |
| C(27)-C(28) | 1.389(2)   |
| C(28)-C(29) | 1.383(2)   |
| C(29)-C(30) | 1.385(2)   |
| C(30)-C(31) | 1.390(2)   |

|                  |            |
|------------------|------------|
| C(19)-N(1)-C(18) | 123.41(10) |
| C(19)-N(1)-C(12) | 122.25(10) |
| C(18)-N(1)-C(12) | 111.52(9)  |
| C(18)-N(2)-C(13) | 112.02(9)  |
| C(18)-N(2)-C(14) | 124.22(11) |
| C(13)-N(2)-C(14) | 119.86(10) |
| C(9)-O(1)-C(11)  | 112.95(10) |
| F(1)-C(1)-F(2)   | 107.07(13) |
| F(1)-C(1)-F(3)   | 106.68(12) |
| F(2)-C(1)-F(3)   | 105.49(11) |
| F(1)-C(1)-C(4)   | 113.16(11) |
| F(2)-C(1)-C(4)   | 112.38(12) |
| F(3)-C(1)-C(4)   | 111.58(12) |
| F(4)-C(2)-F(5A)  | 113.7(4)   |
| F(4)-C(2)-F(4A)  | 44.5(3)    |
| F(5A)-C(2)-F(4A) | 130.3(2)   |
| F(4)-C(2)-F(6A)  | 130.6(3)   |
| F(5A)-C(2)-F(6A) | 47.6(3)    |
| F(4A)-C(2)-F(6A) | 106.6(3)   |
| F(4)-C(2)-F(5)   | 64.2(5)    |
| F(5A)-C(2)-F(5)  | 58.1(3)    |
| F(4A)-C(2)-F(5)  | 105.3(4)   |
| F(6A)-C(2)-F(5)  | 102.9(4)   |

|                   |            |
|-------------------|------------|
| F(4)-C(2)-F(6)    | 102.1(4)   |
| F(5A)-C(2)-F(6)   | 103.4(4)   |
| F(4A)-C(2)-F(6)   | 58.8(3)    |
| F(6A)-C(2)-F(6)   | 57.3(3)    |
| F(5)-C(2)-F(6)    | 141.7(2)   |
| F(4)-C(2)-C(6)    | 114.6(2)   |
| F(5A)-C(2)-C(6)   | 114.05(17) |
| F(4A)-C(2)-C(6)   | 115.60(19) |
| F(6A)-C(2)-C(6)   | 114.46(18) |
| F(5)-C(2)-C(6)    | 110.87(18) |
| F(6)-C(2)-C(6)    | 107.33(19) |
| C(4)-C(3)-C(8)    | 119.85(12) |
| C(3)-C(4)-C(5)    | 121.07(12) |
| C(3)-C(4)-C(1)    | 120.35(12) |
| C(5)-C(4)-C(1)    | 118.55(11) |
| C(6)-C(5)-C(4)    | 118.59(12) |
| C(5)-C(6)-C(7)    | 120.86(12) |
| C(5)-C(6)-C(2)    | 120.00(12) |
| C(7)-C(6)-C(2)    | 119.14(12) |
| C(8)-C(7)-C(6)    | 120.30(12) |
| C(7)-C(8)-C(3)    | 119.31(11) |
| C(7)-C(8)-C(9)    | 119.84(11) |
| C(3)-C(8)-C(9)    | 120.83(11) |
| O(1)-C(9)-C(10)   | 105.93(11) |
| O(1)-C(9)-C(8)    | 111.93(10) |
| C(10)-C(9)-C(8)   | 110.78(11) |
| O(1)-C(11)-C(12)  | 106.50(9)  |
| N(1)-C(12)-C(26)  | 113.26(9)  |
| N(1)-C(12)-C(11)  | 111.73(9)  |
| C(26)-C(12)-C(11) | 110.15(9)  |
| N(1)-C(12)-C(13)  | 101.08(9)  |
| C(26)-C(12)-C(13) | 110.82(9)  |
| C(11)-C(12)-C(13) | 109.47(9)  |
| N(2)-C(13)-C(12)  | 105.59(9)  |
| N(2)-C(14)-C(15)  | 108.36(11) |
| N(2)-C(14)-C(17)  | 111.07(11) |
| C(15)-C(14)-C(17) | 110.70(13) |

|                   |            |
|-------------------|------------|
| N(2)-C(14)-C(16)  | 107.92(11) |
| C(15)-C(14)-C(16) | 110.32(13) |
| C(17)-C(14)-C(16) | 108.42(12) |
| O(2)-C(18)-N(2)   | 128.60(11) |
| O(2)-C(18)-N(1)   | 124.26(11) |
| N(2)-C(18)-N(1)   | 107.14(10) |
| O(3)-C(19)-N(1)   | 120.72(11) |
| O(3)-C(19)-C(20)  | 120.64(10) |
| N(1)-C(19)-C(20)  | 118.37(10) |
| C(25)-C(20)-C(21) | 119.34(12) |
| C(25)-C(20)-C(19) | 118.58(11) |
| C(21)-C(20)-C(19) | 121.60(11) |
| C(22)-C(21)-C(20) | 120.10(13) |
| C(21)-C(22)-C(23) | 120.26(14) |
| C(24)-C(23)-C(22) | 119.90(13) |
| C(23)-C(24)-C(25) | 120.11(13) |
| C(20)-C(25)-C(24) | 120.24(13) |
| C(31)-C(26)-C(27) | 118.36(11) |
| C(31)-C(26)-C(12) | 119.32(11) |
| C(27)-C(26)-C(12) | 122.27(11) |
| C(28)-C(27)-C(26) | 120.33(12) |
| C(29)-C(28)-C(27) | 120.84(13) |
| C(28)-C(29)-C(30) | 119.31(13) |
| C(29)-C(30)-C(31) | 120.34(13) |
| C(30)-C(31)-C(26) | 120.81(13) |

---

Symmetry transformations used to generate equivalent atoms:

Table 4. Anisotropic displacement parameters ( $\text{\AA}^2 \times 10^3$ ) for ys190\_0m. The anisotropic displacement factor exponent takes the form:  $-2\pi^2 [ h^2 a^{*2} U^{11} + \dots + 2 h k a^* b^* U^{12} ]$

|       | U11    | U22    | U33    | U23    | U13   | U12   |
|-------|--------|--------|--------|--------|-------|-------|
| N(1)  | 16(1)  | 11(1)  | 23(1)  | 0(1)   | 10(1) | 0(1)  |
| N(2)  | 16(1)  | 14(1)  | 26(1)  | 0(1)   | 11(1) | 0(1)  |
| O(1)  | 20(1)  | 16(1)  | 19(1)  | 0(1)   | 5(1)  | -1(1) |
| O(2)  | 24(1)  | 13(1)  | 46(1)  | -4(1)  | 19(1) | -3(1) |
| O(3)  | 25(1)  | 20(1)  | 32(1)  | 5(1)   | 18(1) | 2(1)  |
| F(1)  | 45(1)  | 43(1)  | 40(1)  | 14(1)  | 23(1) | 25(1) |
| F(2)  | 39(1)  | 42(1)  | 44(1)  | -19(1) | 16(1) | 7(1)  |
| F(3)  | 24(1)  | 43(1)  | 64(1)  | 4(1)   | 22(1) | 3(1)  |
| F(4)  | 217(7) | 49(2)  | 26(1)  | 14(1)  | 23(3) | 43(3) |
| F(4A) | 111(3) | 44(2)  | 76(3)  | 34(2)  | 78(3) | 37(2) |
| F(5)  | 37(1)  | 111(4) | 84(3)  | 76(3)  | -2(2) | 1(2)  |
| F(5A) | 130(4) | 43(2)  | 99(4)  | 43(2)  | 91(4) | 54(2) |
| F(6)  | 92(3)  | 58(3)  | 157(5) | 61(3)  | 59(3) | 3(2)  |
| F(6A) | 174(5) | 22(1)  | 38(1)  | 4(1)   | 23(2) | 5(2)  |
| C(1)  | 23(1)  | 27(1)  | 28(1)  | 0(1)   | 13(1) | 4(1)  |
| C(2)  | 50(1)  | 25(1)  | 37(1)  | 8(1)   | 26(1) | 9(1)  |
| C(3)  | 19(1)  | 19(1)  | 22(1)  | 1(1)   | 7(1)  | 1(1)  |
| C(4)  | 19(1)  | 20(1)  | 20(1)  | -2(1)  | 7(1)  | 0(1)  |
| C(5)  | 26(1)  | 20(1)  | 22(1)  | -2(1)  | 11(1) | 0(1)  |
| C(6)  | 29(1)  | 19(1)  | 23(1)  | 1(1)   | 12(1) | 2(1)  |
| C(7)  | 24(1)  | 19(1)  | 23(1)  | 1(1)   | 9(1)  | 4(1)  |
| C(8)  | 19(1)  | 19(1)  | 19(1)  | -1(1)  | 7(1)  | 0(1)  |
| C(9)  | 18(1)  | 22(1)  | 21(1)  | 2(1)   | 8(1)  | 4(1)  |
| C(10) | 21(1)  | 43(1)  | 24(1)  | 1(1)   | 5(1)  | -7(1) |
| C(11) | 19(1)  | 13(1)  | 20(1)  | 1(1)   | 7(1)  | -1(1) |
| C(12) | 16(1)  | 12(1)  | 21(1)  | -1(1)  | 8(1)  | 1(1)  |
| C(13) | 18(1)  | 14(1)  | 25(1)  | -2(1)  | 11(1) | -1(1) |
| C(14) | 18(1)  | 17(1)  | 34(1)  | 1(1)   | 16(1) | 0(1)  |
| C(15) | 20(1)  | 34(1)  | 44(1)  | -1(1)  | 9(1)  | -4(1) |
| C(16) | 34(1)  | 29(1)  | 47(1)  | -8(1)  | 30(1) | -4(1) |



|       |       |       |       |       |       |       |
|-------|-------|-------|-------|-------|-------|-------|
| C(17) | 39(1) | 25(1) | 59(1) | 12(1) | 34(1) | 1(1)  |
| C(18) | 17(1) | 14(1) | 24(1) | 0(1)  | 10(1) | -1(1) |
| C(19) | 16(1) | 16(1) | 23(1) | 0(1)  | 9(1)  | 1(1)  |
| C(20) | 16(1) | 14(1) | 27(1) | -1(1) | 10(1) | 0(1)  |
| C(21) | 23(1) | 19(1) | 29(1) | 3(1)  | 13(1) | 3(1)  |
| C(22) | 28(1) | 19(1) | 37(1) | 6(1)  | 12(1) | 4(1)  |
| C(23) | 24(1) | 16(1) | 51(1) | 2(1)  | 14(1) | 3(1)  |
| C(24) | 26(1) | 20(1) | 43(1) | -7(1) | 17(1) | 2(1)  |
| C(25) | 23(1) | 20(1) | 31(1) | -5(1) | 13(1) | 0(1)  |
| C(26) | 18(1) | 14(1) | 19(1) | -1(1) | 8(1)  | -1(1) |
| C(27) | 22(1) | 18(1) | 23(1) | 0(1)  | 5(1)  | 0(1)  |
| C(28) | 23(1) | 26(1) | 24(1) | 0(1)  | 4(1)  | 0(1)  |
| C(29) | 26(1) | 25(1) | 28(1) | -5(1) | 5(1)  | -8(1) |
| C(30) | 31(1) | 17(1) | 36(1) | -5(1) | 6(1)  | -5(1) |
| C(31) | 23(1) | 15(1) | 32(1) | 0(1)  | 5(1)  | 0(1)  |

---

Table 5. Hydrogen coordinates ( $\times 10^4$ ) and isotropic displacement parameters ( $\text{\AA}^2 \times 10^3$ ) for ys190\_0m.

|        | x     | y     | z     | U(eq) |
|--------|-------|-------|-------|-------|
| H(3A)  | 6297  | 8114  | 7208  | 24    |
| H(5A)  | 7122  | 9635  | 4400  | 26    |
| H(7A)  | 3803  | 10367 | 5769  | 26    |
| H(9A)  | 3584  | 9655  | 7693  | 24    |
| H(10A) | 2176  | 8291  | 7506  | 44    |
| H(10B) | 3162  | 7797  | 6764  | 44    |
| H(10C) | 2100  | 8634  | 6097  | 44    |
| H(11A) | 5509  | 9889  | 9533  | 21    |
| H(11B) | 6792  | 9345  | 9179  | 21    |
| H(13A) | 5488  | 9088  | 12311 | 22    |
| H(13B) | 4327  | 9189  | 10873 | 22    |
| H(15A) | 2184  | 8308  | 9811  | 49    |
| H(15B) | 1184  | 7530  | 10149 | 49    |
| H(15C) | 2452  | 7250  | 9557  | 49    |
| H(16A) | 2876  | 8902  | 12077 | 49    |
| H(16B) | 3624  | 8228  | 13267 | 49    |
| H(16C) | 1904  | 8121  | 12445 | 49    |
| H(17A) | 3556  | 6193  | 11442 | 55    |
| H(17B) | 2317  | 6484  | 12063 | 55    |
| H(17C) | 4038  | 6592  | 12882 | 55    |
| H(21A) | 8442  | 6569  | 12551 | 27    |
| H(22A) | 9651  | 5159  | 13120 | 33    |
| H(23A) | 10324 | 4305  | 11589 | 36    |
| H(24A) | 9840  | 4878  | 9499  | 34    |
| H(25A) | 8745  | 6326  | 8952  | 28    |
| H(27A) | 9142  | 8335  | 12601 | 26    |
| H(28A) | 11058 | 9221  | 13954 | 30    |
| H(29A) | 10870 | 10818 | 13966 | 32    |
| H(30A) | 8740  | 11534 | 12601 | 35    |
| H(31A) | 6830  | 10660 | 11213 | 29    |
